# Supplementary material
Source: MDPI journal article supplement (https://www.mdpi.com/1099-4300/19/7/338)
Supplement: s1 [file s1]

## Sheet: AnR_LV1-2_Ent D100
notation used in the paper					nab											Ra
IdxBfSort	Seq	UserID	tRecTrans	RecAnR	tRecAnSell	tRecAnBuy	tGivTrans	AdditionalGive	GivAnR	tmpGivAnR	tGivAnSell	tGivAnBuy	TotTrans(Rec+Giv)	TotAn(Rec+Giv)	TotAnR(Rec)	TotAnR(Rec+Giv)	TotAnBuy(Rec+Giv)	Nr	NDAmean	Core	CW	LV2nBetweenness	2Core	3Core	4Core	5Core	6Core	k-Plex	K2_S5	K2_S6	K2_S7	SuspendedStatus
1	1	0123ja	9	0	0	0	2	0	0	0	0	0	11	0	0	0	0	1.5	590.5	3	0	2.21487e-06	True	True	False	False	False	4	False	False	False	Yes
135	2	charge1118	106	0.00943396	0	1	141	0	0.0070922	0.0070922	0	1	247	2	0.00404858	0.00809717	2	3.31821	4028.45	2	97.2086	0.00291076	True	False	False	False	False	4	False	False	False	No
2332	3	ft0807	1	0	0	0	6	0	0	0	0	0	7	0	0	0	0	0	748	1	0	2.59667e-05	False	False	False	False	False	3	False	False	False	No
3593	4	rainy811022	8	0	0	0	7	0	0	0	0	0	15	0	0	0	0	1.90564	8344.62	1	0	0	False	False	False	False	False	3	False	False	False	No
2	5	093sc	7	0	0	0	1	0	0	0	0	0	8	0	0	0	0	0	11.5	2	9.57143	1.12482e-05	True	False	False	False	False	4	False	False	False	Yes
1065	6	-doris2899-	87	0	0	0	89	0	0	0	0	0	176	0	0	0	0	3.06532	2321.51	1	0	0	False	False	False	False	False	3	False	False	False	No
2333	7	ftcs0917	3150	0.364762	1116	33	3029	0	0.245956	0.245956	745	0	6179	1894	0.185952	0.306522	33	1.94639	104.836	1	0	0	False	False	False	False	False	3	False	False	False	No
3594	8	randy1226	120	0.00833333	1	0	121	0	0.00826446	0.00826446	1	0	241	2	0.00414938	0.00829876	0	3.33466	2608.1	1	0	0	False	False	False	False	False	3	False	False	False	No
3	9	19qkx352	4	0	0	0	0	0	0	0	0	0	4	0	0	0	0	0	13	4	0	4.7249e-05	True	True	True	False	False	4	False	False	False	Yes
1066	10	004264	124	0	0	0	124	0	0	0	0	0	248	0	0	0	0	3.28101	3194.34	1	0	0	False	False	False	False	False	3	False	False	False	No
2334	11	ftisland841111	4	0	0	0	2	0	0	0	0	0	6	0	0	0	0	1.58496	4149	1	0	0	False	False	False	False	False	3	False	False	False	No
3595	12	raptor0998	34	0.0294118	1	0	5	0	0.2	0.2	1	0	39	2	0.025641	0.0512821	0	2.83362	1903.48	1	0	0	False	False	False	False	False	3	False	False	False	No
4	13	1mgc31x8	3	0	0	0	0	0	0	0	0	0	3	0	0	0	0	0	4.33333	2	0	9.9499e-05	True	False	False	False	False	4	False	False	False	Yes
1067	14	0081206	223	0.112108	7	18	236	0	0.105932	0.105932	7	18	459	50	0.0544662	0.108932	36	2.78215	763.549	1	0	0	False	False	False	False	False	3	False	False	False	No
2335	15	ftr6vthkfyae	8	0.125	0	1	8	0	0	0	0	0	16	1	0.0625	0.0625	1	1.84237	6582	1	0	0	False	False	False	False	False	3	False	False	False	No
3596	16	rarapipi	10	0.2	0	2	10	0	0.2	0.2	0	2	20	4	0.1	0.2	4	2.5	3058.25	1	0	0	False	False	False	False	False	3	False	False	False	No
5	17	1r1hq5	8	0.625	5	0	0	0	0	0	0	0	8	5	0.625	0.625	0	0.918296	42	3	0	0.000217046	True	True	False	False	False	3	False	False	False	Yes
1068	18	015225	2	0	0	0	1	0	0	0	0	0	3	0	0	0	0	1	1884.5	1	0	0	False	False	False	False	False	3	False	False	False	No
2336	19	fu2246	1	0	0	0	1	0	0	0	0	0	2	0	0	0	0	0	48	1	0	0	False	False	False	False	False	3	False	False	False	No
3597	20	rc17425	1	0	0	0	2	0	0	0	0	0	3	0	0	0	0	0	1600	1	0	0	False	False	False	False	False	3	False	False	False	No
6	21	227m55xh	35	0.342857	12	0	13	0	0.153846	0.153846	2	0	48	14	0.25	0.291667	0	1	90.5	1	0	1.52274e-06	False	False	False	False	False	3	False	False	False	Yes
1069	22	0167tw	331	0.0302115	10	0	318	0	0.0314465	0.0314465	10	0	649	20	0.0154083	0.0308166	0	3.0248	2070.64	1	0	0	False	False	False	False	False	3	False	False	False	No
2337	23	fuck071894	3	0	0	0	5	0	0	0	0	0	8	0	0	0	0	1.58496	13319	1	0	0	False	False	False	False	False	3	False	False	False	No
3598	24	rd866587	5	0	0	0	6	0	0	0	0	0	11	0	0	0	0	1	2799.5	1	0	0	False	False	False	False	False	3	False	False	False	No
7	25	229x2rk3	18	0	0	0	0	0	0	0	0	0	18	0	0	0	0	0	1	1	1	0	False	False	False	False	False	0	False	False	False	Yes
1070	26	0212908	75	0.0533333	3	1	94	0	0.0425532	0.0425532	3	1	169	8	0.0236686	0.0473373	2	2.99958	2205.12	1	0	0	False	False	False	False	False	3	False	False	False	No
2338	27	fuck306270	21	0	0	0	21	0	0	0	0	0	42	0	0	0	0	2.70523	8962.22	1	0	0	False	False	False	False	False	3	False	False	False	No
3599	28	reagerjto	3	0	0	0	49	0	0.428571	0.428571	0	21	52	21	0	0.403846	21	0.918296	50.3333	4	0	0.000166531	True	True	True	False	False	4	False	False	False	No
8	29	23fs8gm9	5	0	0	0	0	0	0	0	0	0	5	0	0	0	0	0	17.6	4	0	9.32102e-05	True	True	True	False	False	4	False	False	False	Yes
1071	30	0228572116	30	0	0	0	30	0	0	0	0	0	60	0	0	0	0	3.07488	7822.69	1	0	0	False	False	False	False	False	3	False	False	False	No
2339	31	fuck7788966	10	0	0	0	9	0	0	0	0	0	19	0	0	0	0	2.75	11518.9	1	0	0	False	False	False	False	False	3	False	False	False	No
3600	32	redj563	51	0.705882	0	36	113	0	0.867257	0.867257	0	98	164	134	0.219512	0.817073	134	1.26381	54.3571	1	0	0	False	False	False	False	False	3	False	False	False	No
9	33	27m2y61g	8	0.625	5	0	0	0	0	0	0	0	8	5	0.625	0.625	0	0	29.6667	1	0	0.000132799	False	False	False	False	False	3	False	False	False	Yes
1072	34	0324tim8	39	0.025641	0	1	41	0	0.0243902	0.0243902	0	1	80	2	0.0125	0.025	2	2.93565	2314.37	1	0	0	False	False	False	False	False	3	False	False	False	No
2340	35	fuf6j69yyy	3	0	0	0	5	0	0	0	0	0	8	0	0	0	0	0	12	1	0	0	False	False	False	False	False	3	False	False	False	No
3601	36	reigyeiy	3	0	0	0	19	0	0	0	0	0	22	0	0	0	0	0	16	1	4	8.01442e-08	False	False	False	False	False	3	False	False	False	No
10	37	29g6bk3g	25	0.96	24	0	0	0	0	0	0	0	25	24	0.96	0.96	0	0	20	1	1	0	False	False	False	False	False	0	False	False	False	Yes
1073	38	033017927	53	0	0	0	52	0	0	0	0	0	105	0	0	0	0	3.28576	4834.2	1	0	0	False	False	False	False	False	3	False	False	False	No
2341	39	fujudo	199	0.0100503	2	0	191	0	0.0104712	0.0104712	1	1	390	4	0.00512821	0.0102564	1	3.39136	3520.98	1	0	0	False	False	False	False	False	3	False	False	False	No
3602	40	reject	1269	0.0102443	0	13	1343	0	0.0104244	0.0104244	0	14	2612	27	0.00497703	0.0103369	27	3.16781	2159.53	1	0	0	False	False	False	False	False	3	False	False	False	No
11	41	2mchgfh5	7	0.142857	1	0	5	0	0	0	0	0	12	1	0.0833333	0.0833333	0	0	3.5	3	11.2835	5.54027e-07	True	True	False	False	False	4	False	False	False	Yes
1074	42	04c4s5ep	6	0	0	0	6	0	0	0	0	0	12	0	0	0	0	0	19.5	1	0	0	False	False	False	False	False	3	False	False	False	No
2342	43	fun9573	301	0.0265781	5	3	312	0	0.025641	0.025641	5	3	613	16	0.0130506	0.0261011	6	3.18447	3077.77	1	0	0	False	False	False	False	False	3	False	False	False	No
3603	44	relmax0508	1	0	0	0	1	0	0	0	0	0	2	0	0	0	0	0	56	1	0	0	False	False	False	False	False	3	False	False	False	No
12	45	2q6mgb76	39	0.512821	20	0	12	0	0.5	0.5	3	3	51	26	0.392157	0.509804	3	0.721928	40.4	1	14	9.6173e-06	False	False	False	False	False	3	False	False	False	Yes
1075	46	0910171619	24	0	0	0	11	0	0	0	0	0	35	0	0	0	0	2.35539	11071.2	1	0	0	False	False	False	False	False	3	False	False	False	No
2343	47	funny-shop	41875	0.148872	6234	0	57220	0	0.138203	0.138203	7908	0	99095	14142	0.0629093	0.142712	0	1.86786	103.553	1	0	0	False	False	False	False	False	3	False	False	False	No
3604	48	renas64	31	0	0	0	27	0	0	0	0	0	58	0	0	0	0	3.01688	12940.8	1	0	0	False	False	False	False	False	3	False	False	False	No
13	49	2ttrk5xx	1	0	0	0	0	0	0	0	0	0	1	0	0	0	0	0	1	1	1	0	False	False	False	False	False	0	False	False	False	Yes
1076	50	0910857898	81	0	0	0	79	0	0	0	0	0	160	0	0	0	0	3.07084	4477.52	1	0	0	False	False	False	False	False	3	False	False	False	No
2344	51	futsai233	14	0	0	0	13	0	0	0	0	0	27	0	0	0	0	2.84535	4829.91	1	0	0	False	False	False	False	False	3	False	False	False	No
3605	52	renault1016	32	0	0	0	27	0	0	0	0	0	59	0	0	0	0	3.11058	6425	1	0	0	False	False	False	False	False	3	False	False	False	No
14	53	2x2f8y8b	4	0	0	0	7	0	0	0	0	0	11	0	0	0	0	0	13.5	3	8	4.80865e-07	True	True	False	False	False	4	False	False	False	Yes
1077	54	0913630771	140	0.00714286	1	0	144	0	0.00694444	0.00694444	1	0	284	2	0.00352113	0.00704225	0	3.28061	3658.69	1	0	0	False	False	False	False	False	3	False	False	False	No
2345	55	fvydegklrfe	213	0	0	0	54	0	0	0	0	0	267	0	0	0	0	0.635768	24.802	1	0	0	False	False	False	False	False	3	False	False	False	No
3606	56	renjilin	18	0	0	0	21	0	0.0952381	0.0952381	1	1	39	2	0	0.0512821	1	2.4165	1113.12	1	0	0	False	False	False	False	False	3	False	False	False	No
15	57	3ettr	1	0	0	0	0	0	0	0	0	0	1	0	0	0	0	0	14	1	0	0	False	False	False	False	False	3	False	False	False	Yes
1078	58	0917766062	17	0.0588235	0	1	16	0	0	0	0	0	33	1	0.030303	0.030303	1	2.2999	3803.91	2	0	0.00480865	True	False	False	False	False	3	False	False	False	No
2346	59	fz0418999	3	0	0	0	1	0	0	0	0	0	4	0	0	0	0	1.58496	10206	1	0	0	False	False	False	False	False	3	False	False	False	No
3607	60	reposeful	17	0	0	0	18	0	0	0	0	0	35	0	0	0	0	2.5	20445.5	1	0	0	False	False	False	False	False	3	False	False	False	No
16	61	3fm9mb	14	0	0	0	0	0	0	0	0	0	14	0	0	0	0	0	1	2	0	7.6137e-07	True	False	False	False	False	3	False	False	False	Yes
1079	62	0918595555	37	0.918919	0	34	38	0	0.894737	0.894737	0	34	75	68	0.453333	0.906667	68	1.58496	1817.67	1	0	0	False	False	False	False	False	3	False	False	False	No
2347	63	g0109236	34	0.0294118	0	1	40	0	0.025	0.025	0	1	74	2	0.0135135	0.027027	2	3.17353	3636.88	1	0	0	False	False	False	False	False	3	False	False	False	No
3608	64	rest437	11	0	0	0	8	0	0	0	0	0	19	0	0	0	0	2.52164	855.571	1	0	0	False	False	False	False	False	3	False	False	False	No
17	65	3fm9mbg2	4	0	0	0	0	0	0	0	0	0	4	0	0	0	0	0.811278	29.5	4	0	8.95781e-05	True	True	True	False	False	4	False	False	False	Yes
1080	66	0918886201	57	0	0	0	59	0	0.0169492	0.0169492	1	0	116	1	0	0.00862069	0	2.86523	2457.36	1	0	0	False	False	False	False	False	3	False	False	False	No
2348	67	g0925607588	4	0.25	0	1	5	0	0.2	0.2	0	1	9	2	0.111111	0.222222	2	0.918296	57.3333	1	0	0	False	False	False	False	False	3	False	False	False	No
3609	68	revivalhsl	642	0.0404984	8	18	675	0	0.04	0.04	9	18	1317	53	0.0197418	0.040243	36	3.17578	1601.82	1	0	0	False	False	False	False	False	3	False	False	False	No
18	69	3gtrfbs5	1	0	0	0	1	0	0	0	0	0	2	0	0	0	0	0	14	1	1	0	False	False	False	False	False	0	False	False	False	Yes
1081	70	0920420195	14	0	0	0	16	0	0	0	0	0	30	0	0	0	0	2.35539	9222.5	1	1	0	False	False	False	False	False	0	False	False	False	No
2349	71	g119724	7	0	0	0	9	0	0	0	0	0	16	0	0	0	0	0.721928	20.4	1	0	0	False	False	False	False	False	3	False	False	False	No
3610	72	rey81806	81	0	0	0	84	0	0	0	0	0	165	0	0	0	0	3.06114	2089.92	1	0	0	False	False	False	False	False	3	False	False	False	No
19	73	3qk2cr9g	10	0	0	0	10	0	0	0	0	0	20	0	0	0	0	0	13.2	3	0	1.68326e-06	True	True	False	False	False	6	True	True	False	Yes
1082	74	0923326982	9	0	0	0	8	0	0	0	0	0	17	0	0	0	0	1.92193	6530.2	1	0	0	False	False	False	False	False	3	False	False	False	No
2350	75	g12058602000	1	0	0	0	5	0	0	0	0	0	6	0	0	0	0	0	23	2	0	1.7708e-06	True	False	False	False	False	3	False	False	False	No
3611	76	rgkjsdlkfl	1	0	0	0	12	0	0	0	0	0	13	0	0	0	0	0	23	4	0	3.18738e-05	True	True	True	False	False	4	False	False	False	No
20	77	3r934769	1	0	0	0	0	0	0	0	0	0	1	0	0	0	0	0	1	1	1	0	False	False	False	False	False	0	False	False	False	Yes
1083	78	0925369509	1	0	0	0	2	0	0	0	0	0	3	0	0	0	0	0	23583	1	0	0	False	False	False	False	False	3	False	False	False	No
2351	79	g125g12591	4	0	0	0	4	0	0	0	0	0	8	0	0	0	0	0.918296	638.333	1	0	0	False	False	False	False	False	3	False	False	False	No
3612	80	richardlsh	43	0.44186	0	19	48	0	0.4375	0.4375	0	21	91	40	0.208791	0.43956	40	2.95114	5564.71	1	0	0	False	False	False	False	False	3	False	False	False	No
21	81	52458	27	0.185185	5	0	25	0	0.2	0.2	5	0	52	10	0.0961538	0.192308	0	0.413817	18.3333	2	23.3756	0.000123644	True	False	False	False	False	4	False	False	False	Yes
1084	82	0926156982	1	0	0	0	1	0	0	0	0	0	2	0	0	0	0	0	3283	1	0	0	False	False	False	False	False	3	False	False	False	No
2352	83	g45667700	16	0	0	0	18	0	0	0	0	0	34	0	0	0	0	2.41592	1433.8	1	0	0	False	False	False	False	False	3	False	False	False	No
3613	84	richiewu707	20	0	0	0	42	0	0	0	0	0	62	0	0	0	0	0.650022	34.8333	3	0	5.71678e-05	True	True	False	False	False	4	False	False	False	No
22	85	52x87422	55	0	0	0	0	0	0	0	0	0	55	0	0	0	0	0	1	2	32.3947	0.000122514	True	False	False	False	False	4	False	False	False	Yes
1085	86	0928250661	1	0	0	0	2	0	0	0	0	0	3	0	0	0	0	0	821	1	0	0	False	False	False	False	False	3	False	False	False	No
2353	87	g48914	19	0.210526	0	4	16	0	0.25	0.25	0	4	35	8	0.114286	0.228571	8	3.02699	9030.31	1	0	0	False	False	False	False	False	3	False	False	False	No
3614	88	richken520	228	0.0394737	9	0	233	0	0.0386266	0.0386266	9	0	461	18	0.0195228	0.0390456	0	3.18166	2925.66	2	0	1.53673e-06	True	False	False	False	False	4	False	False	False	No
23	89	546654	13	0	0	0	0	0	0	0	0	0	13	0	0	0	0	0.413817	14.25	3	27.6415	0.000240116	True	True	False	False	False	3	False	False	False	Yes
1086	90	0930755868	7	0	0	0	7	0	0	0	0	0	14	0	0	0	0	2.25163	6856.33	1	0	0	False	False	False	False	False	3	False	False	False	No
2354	91	g6g66m	412	0.0873786	36	0	490	0	0.0877551	0.0877551	43	0	902	79	0.0399113	0.0875831	0	1.79885	116.32	1	0	0	False	False	False	False	False	3	False	False	False	No
3615	92	rick784512	80	0.05	0	4	63	0	0.031746	0.031746	0	2	143	6	0.027972	0.041958	6	3.29161	4160.5	1	0	0	False	False	False	False	False	3	False	False	False	No
24	93	5689331x	15	0	0	0	0	0	0	0	0	0	15	0	0	0	0	0.591673	17.5714	2	13.6454	6.75692e-06	True	False	False	False	False	3	False	False	False	Yes
1087	94	0930803454	7	0	0	0	7	0	0	0	0	0	14	0	0	0	0	2.58496	3476	1	0	0	False	False	False	False	False	3	False	False	False	No
2355	95	g810716	4	0.25	0	1	5	0	0.2	0.2	0	1	9	2	0.111111	0.222222	2	0	1281	1	0	0	False	False	False	False	False	3	False	False	False	No
3616	96	ricky61815	2	0	0	0	7	0	0	0	0	0	9	0	0	0	0	1	41	1	0	0	False	False	False	False	False	3	False	False	False	No
25	97	5r3y23	43	0.953488	41	0	0	0	0	0	0	0	43	41	0.953488	0.953488	0	1	33.5	1	3	7.69384e-06	False	False	False	False	False	0	False	False	False	Yes
1088	98	0933296172	2	0	0	0	3	0	0	0	0	0	5	0	0	0	0	1	936	1	0	0	False	False	False	False	False	3	False	False	False	No
2356	99	g900	81	0.0246914	0	2	84	0	0.0238095	0.0238095	0	2	165	4	0.0121212	0.0242424	4	3.24769	7453.98	1	4	8.01442e-08	False	False	False	False	False	3	False	False	False	No
3617	100	rickyweng8888	157	0.101911	16	0	169	0	0.106509	0.106509	18	0	326	34	0.0490798	0.104294	0	2.99681	1242.18	1	0	0	False	False	False	False	False	3	False	False	False	No
26	101	5s21k249	5	0.6	3	0	0	0	0	0	0	0	5	3	0.6	0.6	0	0	42	1	0	0	False	False	False	False	False	3	False	False	False	Yes
1089	102	0933580024	62	0	0	0	63	0	0	0	0	0	125	0	0	0	0	3.13556	4383.06	1	0	0	False	False	False	False	False	3	False	False	False	No
2357	103	gabriela	278	0.0431655	1	11	275	0	0.0436364	0.0436364	1	11	553	24	0.0216998	0.0433996	22	3.23297	3140.99	1	0	0	False	False	False	False	False	3	False	False	False	No
3618	104	right311375	2	0	0	0	1	0	0	0	0	0	3	0	0	0	0	0	1	1	0	0	False	False	False	False	False	3	False	False	False	No
27	105	61186r3c	3	0	0	0	0	0	0	0	0	0	3	0	0	0	0	0	5.5	2	0	1.63474e-08	True	False	False	False	False	4	False	False	False	Yes
1090	106	0939234666	10	0	0	0	11	0	0	0	0	0	21	0	0	0	0	2.17095	2579.7	1	1	0	False	False	False	False	False	0	False	False	False	No
2358	107	gaby7731	6	0	0	0	8	0	0	0	0	0	14	0	0	0	0	1.52193	89.6	1	0	4.80865e-06	False	False	False	False	False	3	False	False	False	No
3619	108	right7588	1	0	0	0	1	0	0	0	0	0	2	0	0	0	0	0	166	1	0	0	False	False	False	False	False	0	False	False	False	No
28	109	61m2g5ty	9	0	0	0	0	0	0	0	0	0	9	0	0	0	0	0	25.3333	4	0	0.000253252	True	True	True	False	False	4	False	False	False	Yes
1092	110	0955154888	7	0	0	0	6	0	0	0	0	0	13	0	0	0	0	1.92193	7651.2	1	0	0	False	False	False	False	False	3	False	False	False	No
2359	111	game1198	14	0	0	0	14	0	0	0	0	0	28	0	0	0	0	2.31582	9331.69	1	0	0	False	False	False	False	False	3	False	False	False	No
3620	112	rika1021rika1021	17	0	0	0	15	0	0	0	0	0	32	0	0	0	0	2.87314	2297.69	1	0	0	False	False	False	False	False	3	False	False	False	No
29	113	655cc3cc	5	0.6	3	0	0	0	0	0	0	0	5	3	0.6	0.6	0	0	8	1	1	0	False	False	False	False	False	0	False	False	False	Yes
1093	114	0956777227	23	0	0	0	28	0	0	0	0	0	51	0	0	0	0	2.95854	6897.5	1	0	0	False	False	False	False	False	3	False	False	False	No
2360	115	gamepower0615	278	0.172662	1	47	284	0	0.169014	0.169014	1	47	562	96	0.0854093	0.170819	94	3.32498	4372.04	1	0	0	False	False	False	False	False	3	False	False	False	No
3621	116	ririkoko20012002	58	0.0689655	3	1	52	0	0.0384615	0.0384615	2	0	110	6	0.0363636	0.0545455	1	3.0127	2021.63	1	0	0	False	False	False	False	False	3	False	False	False	No
30	117	6yy48fsm	1	0	0	0	0	0	0	0	0	0	1	0	0	0	0	0	14	1	1	0	False	False	False	False	False	0	False	False	False	Yes
1094	118	0958995947	70	0	0	0	76	0	0	0	0	0	146	0	0	0	0	3.03529	5380.49	1	0	0	False	False	False	False	False	3	False	False	False	No
2361	119	ganbad3	334	0.00299401	0	1	353	0	0.00283286	0.00283286	0	1	687	2	0.0014556	0.00291121	2	3.31355	3151.53	1	1	0	False	False	False	False	False	0	False	False	False	No
3622	120	rismyl	32	0.375	2	10	26	0	0.307692	0.307692	2	6	58	20	0.206897	0.344828	16	2.73957	895.933	1	0	0	False	False	False	False	False	3	False	False	False	No
31	121	777h3y2q	1	0	0	0	3	0	0	0	0	0	4	0	0	0	0	0	2	2	1	0.000368879	True	False	False	False	False	4	False	False	False	Yes
1095	122	096834926	58	0.0172414	0	1	51	0	0.0196078	0.0196078	0	1	109	2	0.00917431	0.0183486	2	3.17837	9900.14	1	1	0	False	False	False	False	False	0	False	False	False	No
2362	123	gaoso911017	85	0	0	0	98	0	0	0	0	0	183	0	0	0	0	3.20899	9445.14	1	0	0	False	False	False	False	False	3	False	False	False	No
3623	124	rita_651024	3137	0.141218	414	29	3940	0	0.132741	0.132741	505	18	7077	966	0.0625971	0.136499	47	2.08827	135.558	1	0	0	False	False	False	False	False	3	False	False	False	No
32	125	7bbkc3hs	14	0.928571	13	0	0	0	0	0	0	0	14	13	0.928571	0.928571	0	0	685	1	1	0	False	False	False	False	False	0	False	False	False	Yes
1096	126	0976265120	9	0.333333	0	3	3	0	0	0	0	0	12	3	0.25	0.25	3	2.58496	6196.83	1	0	0	False	False	False	False	False	3	False	False	False	No
2363	127	garcia840524	1	0	0	0	2	0	0	0	0	0	3	0	0	0	0	0	247	1	0	0	False	False	False	False	False	3	False	False	False	No
3624	128	rita0579	48	0	0	0	57	0	0	0	0	0	105	0	0	0	0	3.17489	2829.39	1	0	0	False	False	False	False	False	3	False	False	False	No
33	129	7by3b357	2	0	0	0	0	0	0	0	0	0	2	0	0	0	0	0	27	2	0	1.32267e-05	True	False	False	False	False	4	False	False	False	Yes
1097	130	0978633174	5	0	0	0	1	0	0	0	0	0	6	0	0	0	0	2	6864	1	0	0	False	False	False	False	False	3	False	False	False	No
2364	131	garnetwendy	118	0	0	0	78	0	0	0	0	0	196	0	0	0	0	3.23741	5173.42	1	0	0	False	False	False	False	False	3	False	False	False	No
3625	132	rita1113mei	67	0	0	0	60	0	0	0	0	0	127	0	0	0	0	3.28176	5656.11	1	0	0	False	False	False	False	False	3	False	False	False	No
34	133	7gtrbm6	1	0	0	0	0	0	0	0	0	0	1	0	0	0	0	0	26	1	0	0	False	False	False	False	False	3	False	False	False	Yes
1098	134	0978801677	12	0	0	0	16	0	0	0	0	0	28	0	0	0	0	1.9183	12039.8	1	0	0	False	False	False	False	False	3	False	False	False	No
2365	135	gary823mr	10	0	0	0	9	0	0	0	0	0	19	0	0	0	0	2.12809	8658.14	1	0	0	False	False	False	False	False	3	False	False	False	No
3626	136	rita8193	461	0	0	0	479	0	0.00208768	0.00208768	0	1	940	1	0	0.00106383	1	3.15697	1558.19	1	0	0	False	False	False	False	False	3	False	False	False	No
35	137	7thq53	10	0.2	2	0	0	0	0	0	0	0	10	2	0.2	0.2	0	0.650022	26.5	4	0	0.000265949	True	True	True	False	False	4	False	False	False	Yes
1099	138	0980280664	14	0	0	0	5	0	0	0	0	0	19	0	0	0	0	2.50326	3712.11	1	0	0	False	False	False	False	False	3	False	False	False	No
2366	139	garyfan	4	0	0	0	7	0	0	0	0	0	11	0	0	0	0	0.918296	891.333	1	0	0	False	False	False	False	False	3	False	False	False	No
3627	140	rita8911127	5	0	0	0	4	0	0	0	0	0	9	0	0	0	0	1.52193	1158.4	1	0	0	False	False	False	False	False	3	False	False	False	No
36	141	7thq532h	5	0	0	0	0	0	0	0	0	0	5	0	0	0	0	0	14.2	1	0	0.000265277	False	False	False	False	False	3	False	False	False	Yes
1100	142	0983291207	60	0.0333333	0	2	6	0	0	0	0	0	66	2	0.030303	0.030303	2	2.87314	3623	1	0	0	False	False	False	False	False	3	False	False	False	No
2367	143	gash612gash612	18	0	0	0	17	0	0	0	0	0	35	0	0	0	0	2.60624	6737.47	1	0	0	False	False	False	False	False	3	False	False	False	No
3628	144	rj_0930	7	0.142857	0	1	8	0	0.125	0.125	0	1	15	2	0.0666667	0.133333	2	2.58496	2846.33	1	0	0	False	False	False	False	False	3	False	False	False	No
37	145	7y2ctgy5	16	0.3125	5	0	0	0	0	0	0	0	16	5	0.3125	0.3125	0	0.845351	28.5455	2	26.6577	0.000772876	True	False	False	False	False	4	False	False	False	Yes
1101	146	0983565127	3	0	0	0	1	0	0	0	0	0	4	0	0	0	0	1.58496	6280.67	1	1	0	False	False	False	False	False	0	False	False	False	No
2368	147	gash7777	35	0	0	0	38	0	0	0	0	0	73	0	0	0	0	3.00966	7089.16	1	0	0	False	False	False	False	False	3	False	False	False	No
3629	148	rjk424d	48	0.729167	0	35	103	0	0.873786	0.873786	0	90	151	125	0.231788	0.827815	125	1.29574	54.7692	1	0	0	False	False	False	False	False	3	False	False	False	No
38	149	83h9xy	33	0.939394	31	0	0	0	0	0	0	0	33	31	0.939394	0.939394	0	0	1	1	1	0	False	False	False	False	False	0	False	False	False	Yes
1102	150	0988702318	2	0	0	0	1	0	0	0	0	0	3	0	0	0	0	1	878.5	1	0	0	False	False	False	False	False	3	False	False	False	No
2369	151	gb1104	4	0	0	0	3	0	0	0	0	0	7	0	0	0	0	1.58496	3965.67	1	0	0	False	False	False	False	False	3	False	False	False	No
3630	152	rk59624	11	0	0	0	9	0	0	0	0	0	20	0	0	0	0	2.52193	398.6	1	0	0	False	False	False	False	False	3	False	False	False	No
39	153	867h24hq	3	0	0	0	0	0	0	0	0	0	3	0	0	0	0	0	100	1	1	0	False	False	False	False	False	0	False	False	False	Yes
1103	154	0physics	3	0	0	0	4	0	0	0	0	0	7	0	0	0	0	0.918296	2303.33	1	0	0	False	False	False	False	False	3	False	False	False	No
2370	155	genecheng888	14	0	0	0	10	0	0	0	0	0	24	0	0	0	0	2.4997	3294.38	1	0	0	False	False	False	False	False	3	False	False	False	No
3631	156	rmoon12345	15	0	0	0	14	0	0	0	0	0	29	0	0	0	0	2.29248	5787.67	1	0	0	False	False	False	False	False	3	False	False	False	No
40	157	87r74hrfg	4	0	0	0	6	0	0	0	0	0	10	0	0	0	0	1	79.5	1	3	2.40433e-07	False	False	False	False	False	3	False	False	False	Yes
1104	158	10191998joe	8	0	0	0	4	0	0	0	0	0	12	0	0	0	0	1.92193	1561	1	0	0	False	False	False	False	False	3	False	False	False	No
2371	159	genen320	145	0.22069	0	32	87	0	0.126437	0.126437	0	11	232	43	0.137931	0.185345	43	2.63183	778.13	1	0	0	False	False	False	False	False	3	False	False	False	No
3632	160	rnlkane	52	0	0	0	58	0	0	0	0	0	110	0	0	0	0	3.29974	4073.18	1	0	0	False	False	False	False	False	3	False	False	False	No
41	161	8sh36f1	1	0	0	0	0	0	0	0	0	0	1	0	0	0	0	0	13	1	0	0	False	False	False	False	False	3	False	False	False	Yes
1105	162	10270615	5	0	0	0	8	0	0	0	0	0	13	0	0	0	0	1.92193	725.4	1	0	0	False	False	False	False	False	3	False	False	False	No
2372	163	george6680	5	0	0	0	5	0	0	0	0	0	10	0	0	0	0	2	9735.75	1	0	0	False	False	False	False	False	3	False	False	False	No
3633	164	robby1019tw	23	0	0	0	20	0	0	0	0	0	43	0	0	0	0	2.56545	6040.15	1	0	0	False	False	False	False	False	3	False	False	False	No
42	165	91yxm8q6	5	0.4	2	0	0	0	0	0	0	0	5	2	0.4	0.4	0	1	27	2	0	4.31454e-06	True	False	False	False	False	4	False	False	False	Yes
1106	166	1059532041	88	0.0113636	0	1	21	0	0.047619	0.047619	0	1	109	2	0.00917431	0.0183486	2	3.09003	8364.63	1	0	0	False	False	False	False	False	3	False	False	False	No
2373	167	gfdhdrhdr	1	0	0	0	29	0	0	0	0	0	30	0	0	0	0	0	82	3	0	8.35111e-07	True	True	False	False	False	4	False	False	False	No
3634	168	robin79boy	14	0	0	0	16	0	0	0	0	0	30	0	0	0	0	2.84237	7683.36	1	0	0	False	False	False	False	False	3	False	False	False	No
43	169	979syg27	2	0	0	0	0	0	0	0	0	0	2	0	0	0	0	0	3	1	1	0	False	False	False	False	False	0	False	False	False	Yes
1107	170	11200406	18	0	0	0	8	0	0	0	0	0	26	0	0	0	0	2.50326	7352.11	1	0	0	False	False	False	False	False	3	False	False	False	No
2374	171	gfdshegrjer	1	0	0	0	25	0	0	0	0	0	26	0	0	0	0	0	82	3	0	8.35111e-07	True	True	False	False	False	4	False	False	False	No
3635	172	rocavence	155	0.0387097	2	4	162	0	0.037037	0.037037	3	3	317	12	0.0189274	0.0378549	7	3.18068	2128.18	1	0	0	False	False	False	False	False	3	False	False	False	No
44	173	992q9tmg	10	0	0	0	9	0	0	0	0	0	19	0	0	0	0	0	12.1667	3	0	4.07875e-06	True	True	False	False	False	6	True	True	False	Yes
1108	174	1120878	8	0	0	0	7	0	0	0	0	0	15	0	0	0	0	2.23593	1272.29	1	0	0	False	False	False	False	False	3	False	False	False	No
2375	175	gfhsfh5	11	0.181818	0	2	27	0	0.037037	0.037037	0	1	38	3	0.0526316	0.0789474	3	0	11.5	2	0	6.58089e-05	True	False	False	False	False	3	False	False	False	No
3636	176	rock60917	7	0	0	0	7	0	0	0	0	0	14	0	0	0	0	2.32193	4607	1	0	0	False	False	False	False	False	3	False	False	False	No
45	177	99fg6349	12	0.75	9	0	2	0	0	0	0	0	14	9	0.642857	0.642857	0	0.918296	29.6667	1	4.85714	1.14606e-05	False	False	False	False	False	3	False	False	False	Yes
1109	178	1122321	75	0.0133333	0	1	56	0	0	0	0	0	131	1	0.00763359	0.00763359	1	3.28108	7288.78	1	0	0	False	False	False	False	False	3	False	False	False	No
2376	179	gfsgfdsgfesa	7	0	0	0	41	0	0	0	0	0	48	0	0	0	0	1.44882	155.714	3	0	8.35111e-07	True	True	False	False	False	4	False	False	False	No
3637	180	rock72287419	3	0	0	0	5	0	0	0	0	0	8	0	0	0	0	1.58496	6858.33	1	0	0	False	False	False	False	False	3	False	False	False	No
46	181	9c6xs8	2	0	0	0	0	0	0	0	0	0	2	0	0	0	0	0	6	2	0	3.52051e-06	True	False	False	False	False	4	False	False	False	Yes
1110	182	120338527	91	0	0	0	102	0	0	0	0	0	193	0	0	0	0	2.98604	3173.37	1	0	0	False	False	False	False	False	3	False	False	False	No
2377	183	gg123122	1	0	0	0	3	0	0	0	0	0	4	0	0	0	0	0	5120	1	0	0	False	False	False	False	False	3	False	False	False	No
3638	184	rockmomo	1	0	0	0	3	0	0	0	0	0	4	0	0	0	0	0	1063	1	0	0	False	False	False	False	False	3	False	False	False	No
47	185	9g9247h8	11	0.0909091	1	0	4	0	0	0	0	0	15	1	0.0666667	0.0666667	0	0.881291	32	1	20	3.60649e-06	False	False	False	False	False	3	False	False	False	Yes
1111	186	12100314	82	0	0	0	85	0	0	0	0	0	167	0	0	0	0	3.04416	1986.6	1	0	0	False	False	False	False	False	3	False	False	False	No
2378	187	gg66666tw	21	0	0	0	14	0	0.142857	0.142857	0	2	35	2	0	0.0571429	2	2.90564	4319.44	1	0	0	False	False	False	False	False	3	False	False	False	No
3639	188	roger360987	2	0	0	0	2	0	0	0	0	0	4	0	0	0	0	1	493	1	0	0	False	False	False	False	False	3	False	False	False	No
48	189	9gh37121	5	0	0	0	0	0	0	0	0	0	5	0	0	0	0	0.721928	26.6	4	0	0.000139043	True	True	True	False	False	4	False	False	False	Yes
1112	190	12126143109	62	0	0	0	67	0	0	0	0	0	129	0	0	0	0	3.21543	4628.29	1	0	0	False	False	False	False	False	3	False	False	False	No
2379	191	ggg52002520	5	0	0	0	5	0	0	0	0	0	10	0	0	0	0	1.92193	1481.4	1	0	0	False	False	False	False	False	3	False	False	False	No
3640	192	roger54rg	4	0	0	0	2	0	0	0	0	0	6	0	0	0	0	2	527	1	0	0	False	False	False	False	False	3	False	False	False	No
49	193	a0911852094	1	0	0	0	0	0	0	0	0	0	1	0	0	0	0	0	2085	1	1	0	False	False	False	False	False	0	False	False	False	Yes
1113	194	121426607	33	0	0	0	35	0	0	0	0	0	68	0	0	0	0	2.8918	1022.7	1	0	0	False	False	False	False	False	3	False	False	False	No
2380	195	gh791125	11	0	0	0	11	0	0	0	0	0	22	0	0	0	0	2.72548	4198.22	1	0	0	False	False	False	False	False	3	False	False	False	No
3641	196	romance_jazz	21	0	0	0	25	0	0	0	0	0	46	0	0	0	0	2.71929	3442.77	1	1	0	False	False	False	False	False	0	False	False	False	No
50	197	a2603669	5	0.8	4	0	0	0	0	0	0	0	5	4	0.8	0.8	0	0	98	1	1	0	False	False	False	False	False	0	False	False	False	Yes
1114	198	123465	576	0.0104167	0	6	584	0	0.010274	0.010274	0	6	1160	12	0.00517241	0.0103448	12	3.23184	3181.11	1	0	0	False	False	False	False	False	3	False	False	False	No
2381	199	ghe51212	7	0	0	0	8	0	0	0	0	0	15	0	0	0	0	1.9183	2959.5	1	0	0	False	False	False	False	False	3	False	False	False	No
3642	200	ronin_ku	303	0	0	0	295	0	0	0	0	0	598	0	0	0	0	3.38645	4871.26	1	0	0	False	False	False	False	False	3	False	False	False	No
51	201	a4895230	10	1	10	0	0	0	0	0	0	0	10	10	1	1	0	0	0	0	0	0	False	False	False	False	False	0	False	False	False	Yes
1115	202	1234koko	21	0	0	0	22	0	0	0	0	0	43	0	0	0	0	2.92745	4956.17	1	0	0	False	False	False	False	False	3	False	False	False	No
2383	203	ghnbg85	72	0.805556	0	58	100	0	0.85	0.85	0	85	172	143	0.337209	0.831395	143	1.56128	63.875	1	0	0	False	False	False	False	False	3	False	False	False	No
3644	204	room1076	7	0.142857	0	1	7	0	0.142857	0.142857	0	1	14	2	0.0714286	0.142857	2	2.25163	3679.83	1	0	0	False	False	False	False	False	3	False	False	False	No
52	205	a86864550	43	0	0	0	4	0	0	0	0	0	47	0	0	0	0	0.632528	148.326	2	101.012	0.000308609	True	False	False	False	False	4	False	False	False	Yes
1116	206	1330gk6123	173	0.115607	20	0	217	0	0.119816	0.119816	26	0	390	46	0.0512821	0.117949	0	1.64909	140.303	1	0	0	False	False	False	False	False	3	False	False	False	No
2384	207	ghoe	110	0	0	0	113	0	0	0	0	0	223	0	0	0	0	3.12038	2351.91	1	0	0	False	False	False	False	False	0	False	False	False	No
3645	208	rootcc	1	0	0	0	1	0	0	0	0	0	2	0	0	0	0	0	447	1	0	0	False	False	False	False	False	3	False	False	False	No
53	209	abip99	9	0	0	0	0	0	0	0	0	0	9	0	0	0	0	0	5.77778	3	16.7625	0.000152163	True	True	False	False	False	4	False	False	False	Yes
1117	210	14082012	23	0	0	0	21	0	0	0	0	0	44	0	0	0	0	2.93121	3069.31	1	0	0	False	False	False	False	False	3	False	False	False	No
2385	211	ghost19910513	28	0.107143	2	1	30	0	0.1	0.1	2	1	58	6	0.0517241	0.103448	2	2.70356	1006.14	1	0	0	False	False	False	False	False	3	False	False	False	No
3646	212	rosalinawen	38	0.0263158	1	0	40	0	0.025	0.025	1	0	78	2	0.0128205	0.025641	0	2.92611	4501.58	1	0	0	False	False	False	False	False	3	False	False	False	No
54	213	abnerxiang	5	1	5	0	0	0	0	0	0	0	5	5	1	1	0	0	0	0	0	0	False	False	False	False	False	0	False	False	False	Yes
1118	214	180180	3	0	0	0	3	0	0	0	0	0	6	0	0	0	0	1.58496	969	1	0	0	False	False	False	False	False	3	False	False	False	No
2387	215	ghym15mt	3	0	0	0	24	0	0	0	0	0	27	0	0	0	0	0	19.5	4	0	0.000539918	True	True	True	False	False	4	False	False	False	No
3647	216	rose1328888	8	0	0	0	8	0	0	0	0	0	16	0	0	0	0	2.40564	2345.88	1	1	0	False	False	False	False	False	0	False	False	False	No
55	217	abrialqian	5	0.6	3	0	5	0	0.6	0.6	3	0	10	6	0.3	0.6	0	0	11	1	3	1.60288e-07	False	False	False	False	False	3	False	False	False	Yes
1119	218	19625	18	0	0	0	20	0	0	0	0	0	38	0	0	0	0	2.46924	4365.12	1	1	0	False	False	False	False	False	0	False	False	False	No
2388	219	gi555999	5	0.2	0	1	3	0	0	0	0	0	8	1	0.125	0.125	1	2	550.75	1	0	0	False	False	False	False	False	3	False	False	False	No
3648	220	rosebbay	15	0	0	0	15	0	0	0	0	0	30	0	0	0	0	2.50326	9624.89	1	0	0	False	False	False	False	False	3	False	False	False	No
56	221	acca99	1	0	0	0	1	0	0	0	0	0	2	0	0	0	0	0	1	1	1	0	False	False	False	False	False	0	False	False	False	Yes
1120	222	19811107	21	0	0	0	29	0	0	0	0	0	50	0	0	0	0	2.41309	4945.36	1	0	0	False	False	False	False	False	3	False	False	False	No
2389	223	gillbert966	4	0.25	0	1	1	0	0	0	0	0	5	1	0.2	0.2	1	1	5139	1	1	0	False	False	False	False	False	0	False	False	False	No
3649	224	roseilove2002	10	0	0	0	10	0	0	0	0	0	20	0	0	0	0	1.79248	5000.67	1	0	0	False	False	False	False	False	3	False	False	False	No
57	225	acvutv	7	0	0	0	2	0	0	0	0	0	9	0	0	0	0	0	8.83333	2	0	0.00024116	True	False	False	False	False	4	False	False	False	Yes
1121	226	20001227	86	0.534884	23	23	89	0	0.516854	0.516854	23	23	175	92	0.262857	0.525714	46	2.85019	692.344	1	0	0	False	False	False	False	False	3	False	False	False	No
2390	227	gina29t	294	0.0782313	8	15	310	0	0.0741935	0.0741935	8	15	604	46	0.0380795	0.0761589	30	2.9715	1049.49	1	0	0	False	False	False	False	False	3	False	False	False	No
3650	228	rosiesong	47	0.106383	5	0	51	0	0.137255	0.137255	7	0	98	12	0.0510204	0.122449	0	2.26082	321.929	1	0	0	False	False	False	False	False	3	False	False	False	No
58	229	acyanf	4	0.25	1	0	0	0	0	0	0	0	4	1	0.25	0.25	0	0.918296	50	1	6	2.40433e-07	False	False	False	False	False	3	False	False	False	Yes
1122	230	20040250	5	0	0	0	5	0	0	0	0	0	10	0	0	0	0	1.52193	146.6	1	0	0	False	False	False	False	False	3	False	False	False	No
2391	231	gina80132000	3	0	0	0	2	0	0	0	0	0	5	0	0	0	0	0.918296	5551	1	0	0	False	False	False	False	False	3	False	False	False	No
3651	232	rosis_mdt	111	0.0720721	7	1	59	0	0.20339	0.20339	11	1	170	20	0.0470588	0.117647	2	3.23226	2961.78	1	0	0	False	False	False	False	False	3	False	False	False	No
59	233	adaua	3	0	0	0	2	0	0	0	0	0	5	0	0	0	0	1	166	1	3	1.92346e-06	False	False	False	False	False	3	False	False	False	Yes
1123	234	21357056	13	0	0	0	16	0	0	0	0	0	29	0	0	0	0	2.40564	9353.75	1	0	0	False	False	False	False	False	3	False	False	False	No
2392	235	gina817908	2	0	0	0	3	0	0	0	0	0	5	0	0	0	0	1	262.5	1	0	0	False	False	False	False	False	3	False	False	False	No
3652	236	rossi2006july	120	0	0	0	120	0	0	0	0	0	240	0	0	0	0	3.181	3009.5	1	1	0	False	False	False	False	False	0	False	False	False	No
60	237	aderwa	11	0.0909091	1	0	10	0	0.1	0.1	1	0	21	2	0.047619	0.0952381	0	1.52193	53.5	1	20	3.60649e-06	False	False	False	False	False	3	False	False	False	Yes
1124	238	21986220	17	0	0	0	16	0	0	0	0	0	33	0	0	0	0	3.23593	5271.86	1	0	0	False	False	False	False	False	3	False	False	False	No
2393	239	girl20066227	1	0	0	0	2	0	0	0	0	0	3	0	0	0	0	0	9	1	0	0	False	False	False	False	False	3	False	False	False	No
3653	240	rossi466	89	0.011236	0	1	91	0	0.032967	0.032967	2	1	180	4	0.00555556	0.0222222	2	3.22037	2830.49	1	0	0	False	False	False	False	False	3	False	False	False	No
61	241	adshfds78	9	0	0	0	9	0	0	0	0	0	18	0	0	0	0	0	8.25	2	0	5.72649e-06	True	False	False	False	False	4	False	False	False	Yes
1125	242	22091897	3	0	0	0	4	0	0	0	0	0	7	0	0	0	0	0.918296	854	1	0	0	False	False	False	False	False	3	False	False	False	No
2394	243	gissxicy	186	0.00537634	1	0	192	0	0.00520833	0.00520833	1	0	378	2	0.0026455	0.00529101	0	3.33082	3436.43	1	0	0	False	False	False	False	False	3	False	False	False	No
3654	244	rougyn0408	18	0	0	0	17	0	0	0	0	0	35	0	0	0	0	2.69238	1909.07	1	0	0	False	False	False	False	False	3	False	False	False	No
62	245	adxcs	1	0	0	0	0	0	0	0	0	0	1	0	0	0	0	0	14	1	1	0	False	False	False	False	False	0	False	False	False	Yes
1126	246	224394	16	0	0	0	19	0	0	0	0	0	35	0	0	0	0	1.44882	1418.43	1	0	0	False	False	False	False	False	3	False	False	False	No
2395	247	gjghkghk	9	0	0	0	42	0	0	0	0	0	51	0	0	0	0	0	24.3333	2	0	3.08021e-06	True	False	False	False	False	4	False	False	False	No
3655	248	roxanne0304	10	0.1	0	1	6	0	0.166667	0.166667	0	1	16	2	0.0625	0.125	2	2.25	4232	1	0	0	False	False	False	False	False	3	False	False	False	No
63	249	afd23dsfsd	1	0	0	0	0	0	0	0	0	0	1	0	0	0	0	0	1	1	0	0	False	False	False	False	False	0	False	False	False	Yes
1127	250	22522292	36	0	0	0	33	0	0	0	0	0	69	0	0	0	0	3.03974	2332.31	1	0	0	False	False	False	False	False	3	False	False	False	No
2396	251	gjunjimmy	5	0.2	0	1	6	0	0.166667	0.166667	0	1	11	2	0.0909091	0.181818	2	2	528	1	0	0	False	False	False	False	False	3	False	False	False	No
3656	252	roy_liu	16	0.1875	3	0	16	0	0.125	0.125	2	0	32	5	0.09375	0.15625	0	2.91398	1574	1	0	0	False	False	False	False	False	3	False	False	False	No
64	253	afikdsa9f8ds	5	0	0	0	1	0	0	0	0	0	6	0	0	0	0	0.811278	22.75	1	8	5.77038e-06	False	False	False	False	False	3	False	False	False	Yes
1128	254	228511326	6	0	0	0	7	0	0	0	0	0	13	0	0	0	0	2.25163	4704.83	1	0	0	False	False	False	False	False	3	False	False	False	No
2397	255	gkjashdlgkjl	6	0	0	0	8	0	0	0	0	0	14	0	0	0	0	0	7.33333	3	0	1.02483e-06	True	True	False	False	False	5	True	False	False	No
3657	256	rq15456	4	0	0	0	5	0	0	0	0	0	9	0	0	0	0	1.5	5315.25	2	0	0.00222096	True	False	False	False	False	3	False	False	False	No
65	257	afjsad87f	8	0	0	0	1	0	0	0	0	0	9	0	0	0	0	1	44.25	1	8	4.80865e-07	False	False	False	False	False	3	False	False	False	Yes
1129	258	2300	99	0.010101	1	0	91	0	0.010989	0.010989	1	0	190	2	0.00526316	0.0105263	0	3.31277	4380.22	1	0	0	False	False	False	False	False	3	False	False	False	No
2398	259	gks520	280	0.00357143	1	0	293	0	0.00341297	0.00341297	1	0	573	2	0.0017452	0.0034904	0	3.35688	4464.42	1	0	0	False	False	False	False	False	3	False	False	False	No
3658	260	rrccookimo	141	0.148936	21	0	161	0	0.136646	0.136646	22	0	302	43	0.0695364	0.142384	0	2.29225	1380.08	1	0	0	False	False	False	False	False	3	False	False	False	No
66	261	agfdshgdj	4	0.75	3	0	0	0	0	0	0	0	4	3	0.75	0.75	0	0	4	1	1	0	False	False	False	False	False	0	False	False	False	Yes
1130	262	23260	11	0	0	0	9	0	0	0	0	0	20	0	0	0	0	2	6189.5	1	0	0	False	False	False	False	False	3	False	False	False	No
2399	263	glay111756	15	0	0	0	21	0	0	0	0	0	36	0	0	0	0	2.77736	8733.92	1	0	0	False	False	False	False	False	3	False	False	False	No
3659	264	rrvf0420	31	0	0	0	33	0	0	0	0	0	64	0	0	0	0	3.20899	10382.9	1	0	0	False	False	False	False	False	3	False	False	False	No
67	265	agmxd	25	0.04	1	0	2	0	0	0	0	0	27	1	0.037037	0.037037	0	0	3.27273	4	31.5647	0.00190867	True	True	True	False	False	4	False	False	False	Yes
1131	266	24165533	2	0	0	0	4	0	0	0	0	0	6	0	0	0	0	1	418	1	0	0	False	False	False	False	False	3	False	False	False	No
2400	267	glayzard	6	0	0	0	7	0	0	0	0	0	13	0	0	0	0	2.25163	3049.17	1	0	0	False	False	False	False	False	3	False	False	False	No
3660	268	rsguo	4	0	0	0	64	0	0	0	0	0	68	0	0	0	0	0	54	3	0	5.18934e-06	True	True	False	False	False	4	False	False	False	No
68	269	agpur	2	0	0	0	2	0	0	0	0	0	4	0	0	0	0	0	8.5	2	0	2.67147e-08	True	False	False	False	False	3	False	False	False	Yes
1132	270	365942417	10	0	0	0	7	0	0	0	0	0	17	0	0	0	0	1.9183	4754.83	1	0	0	False	False	False	False	False	3	False	False	False	No
2401	271	glitterglitter	3	0.333333	0	1	4	0	0	0	0	0	7	1	0.142857	0.142857	1	0	551	1	0	0	False	False	False	False	False	3	False	False	False	No
3663	272	rtx2000	928	0.00215517	1	1	790	0	0.00126582	0.00126582	1	0	1718	3	0.00116414	0.00174622	1	3.26722	3050.69	1	0	0	False	False	False	False	False	3	False	False	False	No
69	273	alastar	15	0.2	3	0	15	0	0.2	0.2	3	0	30	6	0.1	0.2	0	1.5	141.75	2	8.28571	2.03032e-06	True	False	False	False	False	4	False	False	False	Yes
1133	274	38007296	26	0.0384615	0	1	26	0	0.0384615	0.0384615	0	1	52	2	0.0192308	0.0384615	2	2.8209	6519.09	1	0	0	False	False	False	False	False	3	False	False	False	No
2402	275	gloryvst	32	0	0	0	24	0	0	0	0	0	56	0	0	0	0	2.64559	8828.79	1	0	0	False	False	False	False	False	3	False	False	False	No
3664	276	ruan0125	25	0	0	0	16	0	0	0	0	0	41	0	0	0	0	3.11828	6262.29	1	0	0	False	False	False	False	False	3	False	False	False	No
70	277	alferalinz	5	0.8	4	0	7	0	0.571429	0.571429	4	0	12	8	0.333333	0.666667	0	0	60	1	1	0	False	False	False	False	False	0	False	False	False	Yes
1134	278	5051uv	27	0	0	0	24	0	0	0	0	0	51	0	0	0	0	2.99527	7842.11	1	0	0	False	False	False	False	False	3	False	False	False	No
2403	279	gmxu30929	2	0	0	0	1	0	0	0	0	0	3	0	0	0	0	1	2519	1	0	0	False	False	False	False	False	3	False	False	False	No
3665	280	ruby02171997	44	0	0	0	47	0	0	0	0	0	91	0	0	0	0	2.9567	4423.42	1	0	0	False	False	False	False	False	3	False	False	False	No
71	281	aliax	2	0	0	0	0	0	0	0	0	0	2	0	0	0	0	0	5.5	1	4	8.01442e-08	False	False	False	False	False	0	False	False	False	Yes
1135	282	51131314	64	0.015625	1	0	66	0	0.0151515	0.0151515	1	0	130	2	0.00769231	0.0153846	0	3.28324	6194.29	1	0	0	False	False	False	False	False	3	False	False	False	No
2404	283	gn370437	102	0	0	0	106	0	0	0	0	0	208	0	0	0	0	3.22583	4481.71	1	0	0	False	False	False	False	False	3	False	False	False	No
3666	284	rup213027	2	0	0	0	2	0	0	0	0	0	4	0	0	0	0	1	45.5	1	0	0	False	False	False	False	False	3	False	False	False	No
72	285	alxe552	3	0.333333	1	0	1	0	1	1	1	0	4	2	0.25	0.5	0	1	56.5	1	4	8.01442e-08	False	False	False	False	False	3	False	False	False	Yes
1136	286	520520bb	26	0	0	0	26	0	0	0	0	0	52	0	0	0	0	2.9152	4998.19	1	0	0	False	False	False	False	False	3	False	False	False	No
2405	287	go-buy	2579	0.128732	332	0	3371	0	0.136755	0.136755	461	0	5950	793	0.0557983	0.133277	0	1.9503	151.862	1	0	0	False	False	False	False	False	3	False	False	False	No
3667	288	ruruby881226	8	0	0	0	6	0	0	0	0	0	14	0	0	0	0	0.970951	3491.8	1	0	0	False	False	False	False	False	3	False	False	False	No
73	289	amy654321	2	0	0	0	2	0	0	0	0	0	4	0	0	0	0	0	1881	1	0	0	False	False	False	False	False	3	False	False	False	Yes
1137	290	548787c	4	0	0	0	4	0	0	0	0	0	8	0	0	0	0	1.58496	119.667	1	0	0	False	False	False	False	False	3	False	False	False	No
2406	291	go120946	1	0	0	0	5	1	1	0.833333	0	5	7	5	0	0.714286	5	0	139	1	0	0	False	False	False	False	False	3	False	False	False	No
3668	292	ruskin1126	93	0.0107527	1	0	96	0	0.0104167	0.0104167	1	0	189	2	0.00529101	0.010582	0	3.25388	3824.04	1	0	0	False	False	False	False	False	3	False	False	False	No
74	293	androt	2	0	0	0	1	0	0	0	0	0	3	0	0	0	0	0	3.5	1	3	4.80865e-07	False	False	False	False	False	0	False	False	False	Yes
1138	294	54missnana	52	0	0	0	54	0	0	0	0	0	106	0	0	0	0	2.84922	1737.17	1	1	0	False	False	False	False	False	0	False	False	False	No
2407	295	gochcn52	314	0.00636943	0	2	74	0	0	0	0	0	388	2	0.00515464	0.00515464	2	3.32021	3120.61	1	0	0	False	False	False	False	False	3	False	False	False	No
3669	296	ruthpro	97	0.0103093	0	1	96	0	0.0104167	0.0104167	0	1	193	2	0.00518135	0.0103627	2	3.28451	3407.25	1	0	0	False	False	False	False	False	3	False	False	False	No
75	297	anspx	11	0.909091	10	0	0	0	0	0	0	0	11	10	0.909091	0.909091	0	0	20	1	1	0	False	False	False	False	False	0	False	False	False	Yes
1139	298	5530333	259	0.003861	0	1	220	0	0.00454545	0.00454545	0	1	479	2	0.00208768	0.00417537	2	3.09118	2567.34	1	0	0	False	False	False	False	False	3	False	False	False	No
2408	299	god102613	85	0.341176	0	29	98	0	0.306122	0.306122	0	30	183	59	0.15847	0.322404	59	3.10352	2965.38	1	0	0	False	False	False	False	False	3	False	False	False	No
3670	300	ruyih0624	646	0.5387	130	218	692	0	0.526012	0.526012	126	238	1338	712	0.26009	0.532138	456	2.59023	398.533	1	0	0	False	False	False	False	False	3	False	False	False	No
76	301	anxin888	4	0.25	1	0	1	0	0	0	0	0	5	1	0.2	0.2	0	1	34	1	4	8.01442e-08	False	False	False	False	False	3	False	False	False	Yes
1140	302	58312a98	16	0	0	0	12	0	0	0	0	0	28	0	0	0	0	2.35275	3908.57	1	1	0	False	False	False	False	False	0	False	False	False	No
2409	303	godbossmvp789	27	0	0	0	23	0	0	0	0	0	50	0	0	0	0	3.17467	4185.91	1	0	0	False	False	False	False	False	3	False	False	False	No
3671	304	ryan2007	47	0.0638298	0	3	52	0	0.0769231	0.0769231	1	3	99	7	0.030303	0.0707071	6	3.15362	3313.32	1	0	0	False	False	False	False	False	3	False	False	False	No
77	305	aosoo	42	0.047619	2	0	0	0	0	0	0	0	42	2	0.047619	0.047619	0	0	1.35	1	40	1.52274e-05	False	False	False	False	False	3	False	False	False	Yes
1141	306	58411248	20	0	0	0	21	0	0	0	0	0	41	0	0	0	0	2.80735	4971	1	0	0	False	False	False	False	False	3	False	False	False	No
2410	307	godyu1220	851	0.052879	45	0	2009	0	0.0418118	0.0418118	84	0	2860	129	0.0157343	0.0451049	0	0.89636	68.4409	1	1	0	False	False	False	False	False	0	False	False	False	No
3672	308	ryo729	659	0	0	0	643	0	0	0	0	0	1302	0	0	0	0	3.29385	4025.19	1	0	0	False	False	False	False	False	3	False	False	False	No
78	309	app0088	69	0	0	0	107	0	0	0	0	0	176	0	0	0	0	2.45915	3216.58	2	23.2188	0.00397187	True	False	False	False	False	4	False	False	False	Yes
1142	310	58802013	125	0	0	0	127	0	0	0	0	0	252	0	0	0	0	3.32388	5546.27	1	0	0	False	False	False	False	False	3	False	False	False	No
2411	311	gofish	5	0	0	0	4	0	0	0	0	0	9	0	0	0	0	1.37095	2041.2	1	0	0	False	False	False	False	False	3	False	False	False	No
3673	312	s_266383838	53	0	0	0	57	0	0	0	0	0	110	0	0	0	0	3.06458	2224.94	1	0	0	False	False	False	False	False	3	False	False	False	No
79	313	app1188	1	0	0	0	0	0	0	0	0	0	1	0	0	0	0	0	84	1	0	0	False	False	False	False	False	3	False	False	False	Yes
1143	314	5951598	4	0	0	0	2	0	0	0	0	0	6	0	0	0	0	2	2899.75	1	0	0	False	False	False	False	False	3	False	False	False	No
2412	315	goldbergrod	3	0	0	0	3	0	0	0	0	0	6	0	0	0	0	1	791	1	0	0	False	False	False	False	False	3	False	False	False	No
3674	316	s00012345678	82	0.0243902	0	2	87	0	0.0229885	0.0229885	0	2	169	4	0.0118343	0.0236686	4	3.03838	6827.7	1	0	0	False	False	False	False	False	3	False	False	False	No
80	317	arenzqiyua	4	1	4	0	0	0	0	0	0	0	4	4	1	1	0	0	0	0	0	0	False	False	False	False	False	0	False	False	False	Yes
1144	318	5r86525k	16	0	0	0	19	0	0	0	0	0	35	0	0	0	0	0.503258	15	3	49.2936	6.47737e-06	True	True	False	False	False	6	True	True	False	No
2413	319	goldenman	85	0	0	0	76	0	0	0	0	0	161	0	0	0	0	3.13948	2202.21	1	0	0	False	False	False	False	False	3	False	False	False	No
3675	320	s00869520	5	0	0	0	6	0	0	0	0	0	11	0	0	0	0	2	8415.5	1	1	0	False	False	False	False	False	0	False	False	False	No
81	321	arosp	17	0.411765	7	0	0	0	0	0	0	0	17	7	0.411765	0.411765	0	0	9.55556	1	18	2.88519e-06	False	False	False	False	False	3	False	False	False	Yes
1145	322	60811exsy	58	0	0	0	48	0	0	0	0	0	106	0	0	0	0	2.7822	5644.04	1	0	0	False	False	False	False	False	3	False	False	False	No
2414	323	gon16136	180	0	0	0	170	0	0	0	0	0	350	0	0	0	0	3.29392	3509.28	1	0	0	False	False	False	False	False	3	False	False	False	No
3676	324	s06e5511	8	0.125	0	1	8	0	0	0	0	0	16	1	0.0625	0.0625	1	1.92193	5496.4	1	0	0	False	False	False	False	False	3	False	False	False	No
82	325	asadf	3	0	0	0	0	0	0	0	0	0	3	0	0	0	0	1	42.5	1	4	8.01442e-08	False	False	False	False	False	0	False	False	False	Yes
1146	326	62101319730919	2	0	0	0	4	0	0.5	0.5	0	2	6	2	0	0.333333	2	0	3077	1	0	0	False	False	False	False	False	3	False	False	False	No
2415	327	gordam77	15	0	0	0	16	0	0	0	0	0	31	0	0	0	0	2.68925	1678.87	1	0	0	False	False	False	False	False	3	False	False	False	No
3677	328	s0927223376	6	0	0	0	9	0	0	0	0	0	15	0	0	0	0	0.811278	5442.75	1	0	0	False	False	False	False	False	3	False	False	False	No
83	329	atlantaxia	1	0	0	0	1	0	0	0	0	0	2	0	0	0	0	0	40	1	1	0	False	False	False	False	False	0	False	False	False	Yes
1147	330	6210open	7	0	0	0	8	0	0	0	0	0	15	0	0	0	0	2.25163	1908.33	1	0	0	False	False	False	False	False	3	False	False	False	No
2416	331	gorrdon5437	25	0.08	0	2	19	0	0.0526316	0.0526316	0	1	44	3	0.0454545	0.0681818	3	2.75	7105.38	1	0	0	False	False	False	False	False	3	False	False	False	No
3678	332	s0927583850	92	0.0434783	0	4	85	0	0.0117647	0.0117647	0	1	177	5	0.0225989	0.0282486	5	3.28167	8059.49	1	0	0	False	False	False	False	False	3	False	False	False	No
84	333	atlgusqgp485	8	1	8	0	0	0	0	0	0	0	8	8	1	1	0	0	0	0	0	0	False	False	False	False	False	0	False	False	False	Yes
1148	334	66806680	4	0	0	0	4	0	0	0	0	0	8	0	0	0	0	0.918296	763	1	0	0	False	False	False	False	False	3	False	False	False	No
2418	335	govf5566	2	0	0	0	3	0	0	0	0	0	5	0	0	0	0	1	694	1	1	0	False	False	False	False	False	0	False	False	False	No
3679	336	s0932114259	40	0	0	0	40	0	0	0	0	0	80	0	0	0	0	3.12472	3177.72	1	0	0	False	False	False	False	False	3	False	False	False	No
85	337	au131618	4	1	4	0	3	0	0.666667	0.666667	2	0	7	6	0.571429	0.857143	0	0	0	0	0	0	False	False	False	False	False	0	False	False	False	Yes
1149	338	702285148007	1	0	0	0	1	0	0	0	0	0	2	0	0	0	0	0	1043	1	0	0	False	False	False	False	False	3	False	False	False	No
2419	339	gracechen10	6	0	0	0	5	0	0	0	0	0	11	0	0	0	0	1.25163	3230.33	1	0	0	False	False	False	False	False	3	False	False	False	No
3680	340	s0935059113	2	0	0	0	2	0	0	0	0	0	4	0	0	0	0	1	2692	1	0	0	False	False	False	False	False	3	False	False	False	No
86	341	aubre888	3	0	0	0	0	0	0	0	0	0	3	0	0	0	0	0	13	1	3	2.48447e-06	False	False	False	False	False	3	False	False	False	Yes
1150	342	7415988	13	0	0	0	13	0	0	0	0	0	26	0	0	0	0	2.71929	1245.38	1	0	0	False	False	False	False	False	3	False	False	False	No
2420	343	grape850712	5	0	0	0	8	0	0	0	0	0	13	0	0	0	0	1	5818	1	0	0	False	False	False	False	False	3	False	False	False	No
3681	344	s0951805	18	0	0	0	13	0	0	0	0	0	31	0	0	0	0	2.49893	3294.6	1	0	0	False	False	False	False	False	3	False	False	False	No
87	345	avhxdwifr927	1	0	0	0	0	0	0	0	0	0	1	0	0	0	0	0	160	1	1	0	False	False	False	False	False	0	False	False	False	Yes
1151	346	77yiko77	1	0	0	0	1	0	0	0	0	0	2	0	0	0	0	0	33	1	0	0	False	False	False	False	False	3	False	False	False	No
2421	347	grassle243	42	0.952381	0	40	116	0	0.594828	0.594828	0	69	158	109	0.253165	0.689873	109	1	61	4	0	0.00450487	True	True	True	False	False	4	False	False	False	No
3682	348	s10105	4	0.25	0	1	4	0	0	0	0	0	8	1	0.125	0.125	1	1.58496	8699	1	0	0	False	False	False	False	False	3	False	False	False	No
88	349	aviejing	7	0.714286	5	0	1	0	0	0	0	0	8	5	0.625	0.625	0	1	158.5	1	4	8.01442e-08	False	False	False	False	False	3	False	False	False	Yes
1152	350	81009	3	0	0	0	5	0	0	0	0	0	8	0	0	0	0	1.58496	990.333	1	0	0	False	False	False	False	False	3	False	False	False	No
2422	351	green30355	86	0.0581395	0	5	94	0	0.0531915	0.0531915	0	5	180	10	0.0277778	0.0555556	10	3.31446	7879.02	1	0	0	False	False	False	False	False	3	False	False	False	No
3683	352	s10124055	2	0	0	0	4	0	0	0	0	0	6	0	0	0	0	1	3219.5	1	1	0	False	False	False	False	False	0	False	False	False	No
89	353	awhee	43	0.976744	42	0	13	0	1	1	13	0	56	55	0.75	0.982143	0	0	48	1	1	0	False	False	False	False	False	0	False	False	False	Yes
1153	354	81xghht8	17	0.0588235	0	1	18	0	0.0555556	0.0555556	0	1	35	2	0.0285714	0.0571429	2	0	11.8	3	0	2.77009e-06	True	True	False	False	False	6	True	True	False	No
2423	355	greenlpd999	135	0.00740741	1	0	137	0	0.00729927	0.00729927	1	0	272	2	0.00367647	0.00735294	0	3.20947	2706.51	1	0	0	False	False	False	False	False	3	False	False	False	No
3684	356	s120428601	19	0	0	0	11	0	0	0	0	0	30	0	0	0	0	2.63129	8409.12	1	0	0	False	False	False	False	False	3	False	False	False	No
90	357	azxmd	5	0.2	1	0	11	0	0.272727	0.272727	3	0	16	4	0.0625	0.25	0	0	12	1	8	4.80865e-07	False	False	False	False	False	3	False	False	False	Yes
1154	358	84645045	111	0.144144	0	16	119	0	0.134454	0.134454	0	16	230	32	0.0695652	0.13913	32	3.1038	2866.73	1	0	0	False	False	False	False	False	3	False	False	False	No
2424	359	greenpeace	260	0.0730769	18	1	279	0	0.078853	0.078853	20	2	539	41	0.0352505	0.0760668	3	2.8996	1208.05	1	0	0	False	False	False	False	False	3	False	False	False	No
3685	360	s1228931	28	0	0	0	25	0	0.04	0.04	0	1	53	1	0	0.0188679	1	3.06347	2991.72	1	0	0	False	False	False	False	False	3	False	False	False	No
91	361	azzass	1	0	0	0	0	0	0	0	0	0	1	0	0	0	0	0	56	1	0	0	False	False	False	False	False	3	False	False	False	Yes
1155	362	85053497	2	0	0	0	2	0	0	0	0	0	4	0	0	0	0	1	2450.5	1	1	0	False	False	False	False	False	0	False	False	False	No
2425	363	gregfu	89	0.0224719	0	2	87	0	0.0229885	0.0229885	0	2	176	4	0.0113636	0.0227273	4	2.6645	1929.5	1	0	0	False	False	False	False	False	3	False	False	False	No
3686	364	s168go	126	0	0	0	126	0	0	0	0	0	252	0	0	0	0	3.03782	5141.99	1	0	0	False	False	False	False	False	3	False	False	False	No
92	365	b734y2ky	6	0	0	0	0	0	0	0	0	0	6	0	0	0	0	0	7	1	0	0	False	False	False	False	False	3	False	False	False	Yes
1156	366	870415	13	0	0	0	14	0	0	0	0	0	27	0	0	0	0	2.84535	9781.27	2	0	0.00259923	True	False	False	False	False	3	False	False	False	No
2426	367	grejurtjk	7	0	0	0	40	0	0	0	0	0	47	0	0	0	0	1.44882	155.714	3	0	8.35111e-07	True	True	False	False	False	4	False	False	False	No
3687	368	s198738	15	0	0	0	14	0	0	0	0	0	29	0	0	0	0	1.56128	2841.5	1	0	0	False	False	False	False	False	3	False	False	False	No
93	369	badleyliuk	2	0	0	0	2	0	0	0	0	0	4	0	0	0	0	1	83	1	4	8.01442e-08	False	False	False	False	False	3	False	False	False	Yes
1157	370	87363165	707	0	0	0	588	0	0	0	0	0	1295	0	0	0	0	3.23037	2728.36	1	0	0	False	False	False	False	False	3	False	False	False	No
2427	371	grejytrkj	1	0	0	0	29	0	0	0	0	0	30	0	0	0	0	0	82	3	0	8.35111e-07	True	True	False	False	False	4	False	False	False	No
3688	372	s22974667	30	0	0	0	24	0	0	0	0	0	54	0	0	0	0	2.87291	3036	1	0	0	False	False	False	False	False	3	False	False	False	No
94	373	balance222	1	0	0	0	0	0	0	0	0	0	1	0	0	0	0	0	1	1	1	0	False	False	False	False	False	0	False	False	False	Yes
1158	374	88414250	18	0.222222	2	2	22	0	0.136364	0.136364	1	2	40	7	0.1	0.175	4	2.66123	8591.31	1	0	0	False	False	False	False	False	3	False	False	False	No
2428	375	grescens	196	0.0102041	2	0	191	0	0.0052356	0.0052356	1	0	387	3	0.00516796	0.00775194	0	3.2549	2457.18	1	0	0.000132719	False	False	False	False	False	3	False	False	False	No
3689	376	s23345667	6	0	0	0	7	0	0	0	0	0	13	0	0	0	0	1.9183	2232.33	1	0	0	False	False	False	False	False	3	False	False	False	No
95	377	balance333	1	1	1	0	0	0	0	0	0	0	1	1	1	1	0	0	0	0	0	0	False	False	False	False	False	0	False	False	False	Yes
1159	378	9206006707	2274	0.208883	475	0	3079	0	0.191296	0.191296	589	0	5353	1064	0.0887353	0.198767	0	1.81252	102.74	1	0	0	False	False	False	False	False	3	False	False	False	No
2429	379	griffon1128	379	0	0	0	419	0	0	0	0	0	798	0	0	0	0	3.21976	2281.03	1	0	0	False	False	False	False	False	3	False	False	False	No
3690	380	s23605863s	10	0	0	0	10	0	0	0	0	0	20	0	0	0	0	2.50326	4252.78	1	0	0	False	False	False	False	False	3	False	False	False	No
96	381	ballshoujin	12	0.833333	10	0	5	0	1	1	5	0	17	15	0.588235	0.882353	0	0	453	1	0	0	False	False	False	False	False	3	False	False	False	Yes
1160	382	9636978zzz	16	0.25	0	4	15	0	0	0	0	0	31	4	0.129032	0.129032	4	2.41309	3655.73	1	0	0	False	False	False	False	False	3	False	False	False	No
2430	383	grilmichelle	1	0	0	0	1	0	0	0	0	0	2	0	0	0	0	0	6856	1	0	0	False	False	False	False	False	3	False	False	False	No
3691	384	s251022620778	67	0.0597015	0	4	69	0	0.0144928	0.0144928	0	1	136	5	0.0294118	0.0367647	5	3.23733	9958.58	1	0	0	False	False	False	False	False	3	False	False	False	No
97	385	bartosz890	173	0.283237	43	6	169	0	0.284024	0.284024	42	6	342	97	0.143275	0.283626	12	1.9598	109.664	1	215.845	0.00671216	False	False	False	False	False	3	False	False	False	Yes
1161	386	970314ss	79	0.202532	7	9	86	0	0.162791	0.162791	6	8	165	30	0.0969697	0.181818	17	2.74863	879.14	1	0	0	False	False	False	False	False	3	False	False	False	No
2432	387	gsn945209	62	0	0	0	62	0	0	0	0	0	124	0	0	0	0	3.18427	7468.79	1	0	0	False	False	False	False	False	3	False	False	False	No
3692	388	s2517879	53	0.0188679	0	1	55	0	0.0181818	0.0181818	0	1	108	2	0.00925926	0.0185185	2	3.06423	4851.84	1	0	0	False	False	False	False	False	3	False	False	False	No
98	389	basyv	10	1	10	0	0	0	0	0	0	0	10	10	1	1	0	0	0	0	0	0	False	False	False	False	False	0	False	False	False	Yes
1162	390	971hyj	2	0	0	0	3	0	0	0	0	0	5	0	0	0	0	1	4580	1	1	0	False	False	False	False	False	0	False	False	False	No
2433	391	gt_c3300k52	2	0	0	0	1	0	0	0	0	0	3	0	0	0	0	1	897.5	1	0	0	False	False	False	False	False	3	False	False	False	No
3695	392	s3300t	13	0	0	0	12	0	0	0	0	0	25	0	0	0	0	2.22219	1820.91	1	0	0	False	False	False	False	False	3	False	False	False	No
99	393	bb1992120919	2	0	0	0	0	0	0	0	0	0	2	0	0	0	0	0	1069	1	1	0	False	False	False	False	False	0	False	False	False	Yes
1163	394	979899100	5	0.2	0	1	5	0	0.2	0.2	0	1	10	2	0.1	0.2	2	2	5115.75	1	0	0	False	False	False	False	False	3	False	False	False	No
2434	395	gt591581571	46	0.0652174	0	3	48	0	0.0625	0.0625	0	3	94	6	0.0319149	0.0638298	6	3.11276	3989.19	1	0	0	False	False	False	False	False	3	False	False	False	No
3696	396	s3309623	11	0	0	0	18	0	0	0	0	0	29	0	0	0	0	2.1867	5159.45	1	0	5.52995e-06	False	False	False	False	False	3	False	False	False	No
100	397	bbox0410	56	0	0	0	94	0	0	0	0	0	150	0	0	0	0	1.95021	2040.57	7	0	3.6675e-07	True	True	True	True	True	4	False	False	False	Yes
1164	398	98151028	35	0.0571429	0	2	35	0	0.0285714	0.0285714	0	1	70	3	0.0285714	0.0428571	3	3.18583	5369.81	1	0	0	False	False	False	False	False	3	False	False	False	No
2435	399	gte5102876	13	0	0	0	14	0	0	0	0	0	27	0	0	0	0	2.04037	10466.3	1	0	0	False	False	False	False	False	3	False	False	False	No
3697	400	s3347642	35	0.0571429	0	2	39	0	0.0769231	0.0769231	0	3	74	5	0.027027	0.0675676	5	3.26381	6855.46	1	0	0	False	False	False	False	False	3	False	False	False	No
101	401	bcvdfe	10	0	0	0	0	0	0	0	0	0	10	0	0	0	0	0	8.6	1	9.71429	0.000158525	False	False	False	False	False	3	False	False	False	Yes
1165	402	9912002	4	0	0	0	5	0	0	0	0	0	9	0	0	0	0	1.5	1400	1	0	0	False	False	False	False	False	3	False	False	False	No
2436	403	gthp	49	0.0408163	0	2	51	0	0.0392157	0.0392157	0	2	100	4	0.02	0.04	4	3.02522	1255.29	1	0	0	False	False	False	False	False	3	False	False	False	No
3698	404	s35182000	19	0	0	0	15	0	0	0	0	0	34	0	0	0	0	2.37878	6987.57	1	0	0	False	False	False	False	False	3	False	False	False	No
102	405	begerzhouha	5	1	5	0	0	0	0	0	0	0	5	5	1	1	0	0	0	0	0	0	False	False	False	False	False	0	False	False	False	Yes
1167	406	a000419214	33	0.121212	0	4	34	0	0.147059	0.147059	0	5	67	9	0.0597015	0.134328	9	2.98523	4179.04	1	0	0	False	False	False	False	False	3	False	False	False	No
2437	407	gtny04	3	0	0	0	3	0	0	0	0	0	6	0	0	0	0	1	9697.5	1	0	0	False	False	False	False	False	3	False	False	False	No
3699	408	s356639	20	0	0	0	21	0	0	0	0	0	41	0	0	0	0	2.18201	6430.64	1	0	0	False	False	False	False	False	3	False	False	False	No
103	409	beltjk	16	0.0625	1	0	1	0	1	1	1	0	17	2	0.0588235	0.117647	0	1.08923	38.1429	1	29	1.04187e-05	False	False	False	False	False	3	False	False	False	Yes
1168	410	a00750160	81	0.0123457	0	1	86	0	0.0116279	0.0116279	0	1	167	2	0.00598802	0.011976	2	3.10875	7827.65	1	0	0	False	False	False	False	False	3	False	False	False	No
2438	411	gtrejytfrjut	7	0	0	0	38	0	0	0	0	0	45	0	0	0	0	1.44882	155.714	3	0	8.35111e-07	True	True	False	False	False	4	False	False	False	No
3700	412	s4201193	7	0	0	0	1	0	0	0	0	0	8	0	0	0	0	1.37095	10950.4	1	0	0	False	False	False	False	False	3	False	False	False	No
104	413	bennionyaoy	2	0	0	0	0	0	0	0	0	0	2	0	0	0	0	1	323.5	1	4	8.01442e-08	False	False	False	False	False	3	False	False	False	Yes
1170	414	a01041019	15	0	0	0	16	0	0	0	0	0	31	0	0	0	0	2.58496	6349.08	1	0	0	False	False	False	False	False	3	False	False	False	No
2439	415	gtrewhtrehdr	7	0	0	0	38	0	0	0	0	0	45	0	0	0	0	1.44882	155.714	3	0	8.35111e-07	True	True	False	False	False	4	False	False	False	No
3701	416	s45645845	15	0	0	0	15	0	0	0	0	0	30	0	0	0	0	0	7.13333	1	0	0	False	False	False	False	False	3	False	False	False	No
105	417	besemershe	5	1	5	0	0	0	0	0	0	0	5	5	1	1	0	0	0	0	0	0	False	False	False	False	False	0	False	False	False	Yes
1171	418	a04207786	7	0	0	0	2	0	0	0	0	0	9	0	0	0	0	1.9183	5720.17	1	0	0	False	False	False	False	False	3	False	False	False	No
2440	419	gtrs	151	0.13245	14	6	140	0	0.15	0.15	15	6	291	41	0.0687285	0.140893	12	3.35321	6074.53	1	0	0	False	False	False	False	False	3	False	False	False	No
3702	420	s4791596	7	0	0	0	7	0	0	0	0	0	14	0	0	0	0	1.95021	446.571	1	0	0	False	False	False	False	False	3	False	False	False	No
106	421	best0222	93	0	0	0	77	0	0	0	0	0	170	0	0	0	0	2.25	1795.5	7	0	8.28277e-07	True	True	True	True	True	4	False	False	False	Yes
1172	422	a04281015	27	0	0	0	30	0	0	0	0	0	57	0	0	0	0	2.43927	4745.37	1	0	0	False	False	False	False	False	3	False	False	False	No
2441	423	guaipu	903	0.0908084	82	0	1298	0	0.0862866	0.0862866	112	0	2201	194	0.0372558	0.0881418	0	1.73323	87.0684	1	0	0	False	False	False	False	False	3	False	False	False	No
3704	424	s51920	8	0	0	0	8	0	0	0	0	0	16	0	0	0	0	2.15564	3630.62	1	0	0	False	False	False	False	False	3	False	False	False	No
107	425	bhyubyu	3	0.333333	1	0	0	0	0	0	0	0	3	1	0.333333	0.333333	0	0	1	1	1	0	False	False	False	False	False	0	False	False	False	Yes
1173	426	a077710684	278	0.0863309	24	0	328	0	0.0792683	0.0792683	26	0	606	50	0.039604	0.0825083	0	2.45901	568.387	1	0	0	False	False	False	False	False	3	False	False	False	No
2442	427	guanlin1127	68	0.0882353	0	6	67	0	0.0895522	0.0895522	0	6	135	12	0.0444444	0.0888889	12	2.84535	5554.91	1	0	0	False	False	False	False	False	3	False	False	False	No
3705	428	s58131525	138	0.0724638	10	0	150	0	0.0666667	0.0666667	10	0	288	20	0.0347222	0.0694444	0	2.83115	1441.19	1	0	0	False	False	False	False	False	3	False	False	False	No
108	429	bi5h5p6c	11	0	0	0	1	0	0	0	0	0	12	0	0	0	0	0.684038	27.9091	2	21.5995	0.0026999	True	False	False	False	False	3	False	False	False	Yes
1174	430	a0804229	1	0	0	0	13	0	0.230769	0.230769	0	3	14	3	0	0.214286	3	0	1647	1	0	0	False	False	False	False	False	3	False	False	False	No
2443	431	guarder37	20	0	0	0	20	0	0	0	0	0	40	0	0	0	0	2.55773	4038.17	1	0	0	False	False	False	False	False	3	False	False	False	No
3706	432	s5904163	104	0.0192308	2	0	107	0	0.0186916	0.0186916	2	0	211	4	0.00947867	0.0189573	0	3.16849	3190.84	1	1	0	False	False	False	False	False	0	False	False	False	No
109	433	bingokids1016	41	0.0243902	0	1	10	0	0	0	0	0	51	1	0.0196078	0.0196078	1	1.5	2980.75	4	0	3.97437e-08	True	True	True	False	False	4	False	False	False	Yes
1175	434	a0912177686	14	0	0	0	12	0	0	0	0	0	26	0	0	0	0	2.29248	1930.5	1	0	0	False	False	False	False	False	3	False	False	False	No
2444	435	guf05432	25	0	0	0	28	0	0	0	0	0	53	0	0	0	0	2.9152	3835	1	0	0	False	False	False	False	False	3	False	False	False	No
3707	436	s60032	23	0	0	0	24	0	0	0	0	0	47	0	0	0	0	2.42484	6739.18	1	0	0	False	False	False	False	False	3	False	False	False	No
110	437	bobsonjux	4	1	4	0	4	0	1	1	4	0	8	8	0.5	1	0	0	0	0	0	0	False	False	False	False	False	0	False	False	False	Yes
1176	438	a0912996082	5	0	0	0	4	0	0	0	0	0	9	0	0	0	0	0.918296	17101.7	1	0	0	False	False	False	False	False	3	False	False	False	No
2445	439	gundamlu	426	0.185446	6	73	444	0	0.195946	0.195946	6	81	870	166	0.0908046	0.190805	154	3.33052	3977.89	1	0	0	False	False	False	False	False	3	False	False	False	No
3708	440	s60032kimo	104	0.278846	0	29	108	0	0.268519	0.268519	0	29	212	58	0.136792	0.273585	58	3.06703	2664.96	1	0	0	False	False	False	False	False	3	False	False	False	No
111	441	bohol92	14	0.428571	6	0	0	0	0	0	0	0	14	6	0.428571	0.428571	0	0.543564	27.125	1	16	2.24404e-06	False	False	False	False	False	3	False	False	False	Yes
1177	442	a0916363467	37	0	0	0	33	0	0	0	0	0	70	0	0	0	0	3.27806	4283.07	1	0	0	False	False	False	False	False	3	False	False	False	No
2446	443	gus22941001	79	0.0506329	0	4	71	0	0.0422535	0.0422535	0	3	150	7	0.0266667	0.0466667	7	2.94088	4876.69	1	0	0	False	False	False	False	False	0	False	False	False	No
3709	444	s6110361110	21	0.285714	0	6	13	0	0.153846	0.153846	0	2	34	8	0.176471	0.235294	8	2.4956	2461.07	1	0	0	False	False	False	False	False	3	False	False	False	No
112	445	bohol929	2	0	0	0	3	0	0	0	0	0	5	0	0	0	0	0	1	1	3	1.28231e-06	False	False	False	False	False	3	False	False	False	Yes
1178	446	a0916638178	1	0	0	0	16	0	0.375	0.375	0	6	17	6	0	0.352941	6	0	157	1	0	0	False	False	False	False	False	3	False	False	False	No
2447	447	gy085720123456789	32	0.40625	0	13	29	0	0.275862	0.275862	0	8	61	21	0.213115	0.344262	21	2.77778	3615.88	1	0	0	False	False	False	False	False	3	False	False	False	No
3710	448	s6992843	27	0	0	0	26	0	0	0	0	0	53	0	0	0	0	2.94504	4833.58	1	0	0	False	False	False	False	False	3	False	False	False	No
113	449	bohol93	13	0.538462	7	0	0	0	0	0	0	0	13	7	0.538462	0.538462	0	1.25163	50.6667	1	0	0.000331396	False	False	False	False	False	3	False	False	False	Yes
1179	450	a0917075650	29	0.137931	0	4	26	0	0.153846	0.153846	0	4	55	8	0.0727273	0.145455	8	2.6645	2162.93	1	0	0	False	False	False	False	False	3	False	False	False	No
2448	451	gy2277gy	38	0.0263158	0	1	41	0	0.0243902	0.0243902	0	1	79	2	0.0126582	0.0253165	2	3.01043	2350.81	1	0	0	False	False	False	False	False	3	False	False	False	No
3711	452	s710i	5	0	0	0	5	0	0	0	0	0	10	0	0	0	0	0.918296	468	1	0	0	False	False	False	False	False	3	False	False	False	No
114	453	borrtongyu	6	0.833333	5	0	6	0	0.833333	0.833333	5	0	12	10	0.416667	0.833333	0	0	129	1	1	0	False	False	False	False	False	0	False	False	False	Yes
1180	454	a0917215526	14	0	0	0	28	0	0	0	0	0	42	0	0	0	0	0.811278	33.75	3	0	7.43048e-05	True	True	False	False	False	4	False	False	False	No
2449	455	h4532113	81	0	0	0	89	0	0.0224719	0.0224719	1	1	170	2	0	0.0117647	1	3.12488	6314.43	1	0	0	False	False	False	False	False	3	False	False	False	No
3712	456	s760201	4	0	0	0	5	0	0	0	0	0	9	0	0	0	0	1.5	302.5	1	0	0	False	False	False	False	False	3	False	False	False	No
115	457	bptfotmoi934	18	0.111111	2	0	19	0	0.0526316	0.0526316	1	0	37	3	0.0540541	0.0810811	0	0.721928	23.5	2	19.5758	9.03953e-05	True	False	False	False	False	4	False	False	False	Yes
1181	458	a091793596100	77	0	0	0	82	0	0	0	0	0	159	0	0	0	0	2.98171	6139.02	1	0	0	False	False	False	False	False	3	False	False	False	No
2450	459	h45645841	3	0	0	0	14	0	0	0	0	0	17	0	0	0	0	0	14	3	0	0.00024207	True	True	False	False	False	3	False	False	False	No
3713	460	s792687	39	0	0	0	36	0	0	0	0	0	75	0	0	0	0	3.20715	3745.79	1	0	4.48808e-06	False	False	False	False	False	3	False	False	False	No
116	461	bracejing	4	0.25	1	0	5	0	0.6	0.6	3	0	9	4	0.111111	0.444444	0	0.918296	64.3333	1	6	2.40433e-07	False	False	False	False	False	3	False	False	False	Yes
1182	462	a0918171728	33	0	0	0	42	0	0	0	0	0	75	0	0	0	0	3.05584	3905.3	1	0	0	False	False	False	False	False	3	False	False	False	No
2451	463	h470826	10	0	0	0	11	0	0	0	0	0	21	0	0	0	0	2.11328	3270.22	1	1	0	False	False	False	False	False	0	False	False	False	No
3714	464	s7956599	8	0	0	0	9	0	0	0	0	0	17	0	0	0	0	2.5	3055.5	1	0	0	False	False	False	False	False	3	False	False	False	No
117	465	brianneque	5	0.8	4	0	0	0	0	0	0	0	5	4	0.8	0.8	0	0	10	1	0	0	False	False	False	False	False	3	False	False	False	Yes
1183	466	a0919028837japan	14	0	0	0	19	0	0	0	0	0	33	0	0	0	0	1.92193	911.6	1	0	0	False	False	False	False	False	3	False	False	False	No
2452	467	h5623892002	6	0.333333	0	2	6	0	0	0	0	0	12	2	0.166667	0.166667	2	1.5	8179	2	0	0.000280786	True	False	False	False	False	4	False	False	False	No
3715	468	s7966263	34	0	0	0	18	0	0.111111	0.111111	0	2	52	2	0	0.0384615	2	2.42119	3889.61	1	1	0	False	False	False	False	False	0	False	False	False	No
118	469	brutgertaga	1	0	0	0	1	0	0	0	0	0	2	0	0	0	0	0	48	1	1	0	False	False	False	False	False	0	False	False	False	Yes
1184	470	a0919058413	14	0.0714286	0	1	26	0	0.153846	0.153846	0	4	40	5	0.025	0.125	5	2.50326	10070.2	1	0	0	False	False	False	False	False	3	False	False	False	No
2453	471	h565d	1	0	0	0	32	0	0	0	0	0	33	0	0	0	0	0	82	3	0	8.35111e-07	True	True	False	False	False	4	False	False	False	No
3716	472	s80233	1	0	0	0	1	0	0	0	0	0	2	0	0	0	0	0	1	1	1	0	False	False	False	False	False	0	False	False	False	No
119	473	bsf8sfc3	4	0.75	3	0	0	0	0	0	0	0	4	3	0.75	0.75	0	0	3	1	0	0	False	False	False	False	False	3	False	False	False	Yes
1185	474	a0921136	41	0.0487805	2	0	29	0	0.172414	0.172414	5	0	70	7	0.0285714	0.1	0	3.08592	5929.07	1	0	0	False	False	False	False	False	3	False	False	False	No
2455	475	h7723321	5	0	0	0	6	0	0	0	0	0	11	0	0	0	0	2.32193	2695.4	1	0	0	False	False	False	False	False	3	False	False	False	No
3717	476	s8063729	1	0	0	0	1	0	0	0	0	0	2	0	0	0	0	0	828	1	0	0	False	False	False	False	False	3	False	False	False	No
120	477	bsgerfg	1	0	0	0	0	0	0	0	0	0	1	0	0	0	0	0	22	1	0	0	False	False	False	False	False	3	False	False	False	Yes
1186	478	a0921915833	28	0.0357143	0	1	29	0	0	0	0	0	57	1	0.0175439	0.0175439	1	2.81996	4281.33	1	1	0	False	False	False	False	False	0	False	False	False	No
2456	479	h7766673	2	0	0	0	3	0	0	0	0	0	5	0	0	0	0	1	9314.5	1	0	0	False	False	False	False	False	3	False	False	False	No
3718	480	s83406	22	0	0	0	22	0	0	0	0	0	44	0	0	0	0	2.58496	4100.5	1	0	0	False	False	False	False	False	3	False	False	False	No
121	481	bsxg49ft	5	0	0	0	0	0	0	0	0	0	5	0	0	0	0	0	25.5	1	0	6.64395e-05	False	False	False	False	False	3	False	False	False	Yes
1187	482	a0922363778	1	0	0	0	1	0	0	0	0	0	2	0	0	0	0	0	12	1	0	0	False	False	False	False	False	3	False	False	False	No
2457	483	h810523	37	0	0	0	30	0	0	0	0	0	67	0	0	0	0	2.87966	7526.91	1	3	1.28231e-06	False	False	False	False	False	3	False	False	False	No
3719	484	s847325	2	0	0	0	4	0	0	0	0	0	6	0	0	0	0	0	302	1	0	0	False	False	False	False	False	3	False	False	False	No
122	485	buchmannshu	1	0	0	0	1	0	0	0	0	0	2	0	0	0	0	0	13	1	1	0	False	False	False	False	False	0	False	False	False	Yes
1188	486	a0922909222	98	0	0	0	98	0	0	0	0	0	196	0	0	0	0	2.99895	1747.96	2	0	0.000220178	True	False	False	False	False	4	False	False	False	No
2458	487	h8310101235	60	0	0	0	61	0	0	0	0	0	121	0	0	0	0	3.08733	3318.8	1	0	0	False	False	False	False	False	3	False	False	False	No
3720	488	s84822x	1	0	0	0	2	0	0	0	0	0	3	0	0	0	0	0	17190	1	0	0	False	False	False	False	False	3	False	False	False	No
123	489	bxs93k78	1	0	0	0	0	0	0	0	0	0	1	0	0	0	0	0	13	1	0	0	False	False	False	False	False	3	False	False	False	Yes
1189	490	a0925025943	20	0.1	0	2	13	0	0.153846	0.153846	0	2	33	4	0.0606061	0.121212	4	2.55034	7225.27	1	0	0	False	False	False	False	False	3	False	False	False	No
2459	491	h8567799	179	0.0726257	13	0	212	0	0.0660377	0.0660377	14	0	391	27	0.0332481	0.0690537	0	3.13366	2324.7	1	0	0	False	False	False	False	False	3	False	False	False	No
3721	492	s8791915	9	0	0	0	12	0	0	0	0	0	21	0	0	0	0	2.72548	5462.33	1	0	0	False	False	False	False	False	3	False	False	False	No
124	493	c05648546	1	0	0	0	0	0	0	0	0	0	1	0	0	0	0	0	4	1	1	0	False	False	False	False	False	0	False	False	False	Yes
1190	494	a0926572635	2	0	0	0	3	0	0	0	0	0	5	0	0	0	0	0	2344.5	1	0	0	False	False	False	False	False	3	False	False	False	No
2461	495	h89931042	6	0	0	0	10	0	0	0	0	0	16	0	0	0	0	1.58496	3032.83	1	0	0	False	False	False	False	False	3	False	False	False	No
3722	496	s88711b	109	0.0183486	0	2	107	0	0.0186916	0.0186916	0	2	216	4	0.00925926	0.0185185	4	2.66676	6528.68	1	0	0	False	False	False	False	False	3	False	False	False	No
125	497	c15614502	8	1	8	0	0	0	0	0	0	0	8	8	1	1	0	0	0	0	0	0	False	False	False	False	False	0	False	False	False	Yes
1191	498	a0929799222	9	0	0	0	8	0	0	0	0	0	17	0	0	0	0	2.9477	5104.33	1	0	0	False	False	False	False	False	3	False	False	False	No
2462	499	hachibo	19	0	0	0	17	0	0	0	0	0	36	0	0	0	0	2.92745	2606.5	1	0	0	False	False	False	False	False	3	False	False	False	No
3723	500	s910329	28	0	0	0	27	0	0	0	0	0	55	0	0	0	0	2.67446	7796.7	1	0	0	False	False	False	False	False	3	False	False	False	No
126	501	c156454152	4	0	0	0	0	0	0	0	0	0	4	0	0	0	0	0	5.75	2	8.04348	4.76858e-06	True	False	False	False	False	3	False	False	False	Yes
1193	502	a0930758514	5	0	0	0	5	0	0	0	0	0	10	0	0	0	0	1.92193	6631.8	1	0	0	False	False	False	False	False	3	False	False	False	No
2463	503	hachibuya	13	0	0	0	10	0	0	0	0	0	23	0	0	0	0	2.45915	3499.75	1	0	0	False	False	False	False	False	3	False	False	False	No
3724	504	s930189	6	0	0	0	7	0	0	0	0	0	13	0	0	0	0	1.25163	1556.5	1	0	0	False	False	False	False	False	3	False	False	False	No
127	505	c561521521	5	0	0	0	3	0	0	0	0	0	8	0	0	0	0	0.918296	43.6667	1	6	2.40433e-07	False	False	False	False	False	3	False	False	False	Yes
1194	506	a0931253434	6	0	0	0	12	0	0	0	0	0	18	0	0	0	0	2.25163	1253.83	1	0	0	False	False	False	False	False	3	False	False	False	No
2464	507	haddowevge	34	0.794118	0	27	79	0	0.556962	0.556962	0	44	113	71	0.238938	0.628319	71	0	17.5	4	0	0.0029785	True	True	True	False	False	4	False	False	False	No
3725	508	s94505	59	0	0	0	61	0	0.0163934	0.0163934	0	1	120	1	0	0.00833333	1	3.02739	3605.58	1	0	0	False	False	False	False	False	3	False	False	False	No
128	509	c58481251	2	1	2	0	0	0	0	0	0	0	2	2	1	1	0	0	0	0	0	0	False	False	False	False	False	0	False	False	False	Yes
1195	510	a0933518000	101	0.049505	5	0	111	0	0.045045	0.045045	5	0	212	10	0.0235849	0.0471698	0	3.22861	2306.98	1	1	0	False	False	False	False	False	0	False	False	False	No
2465	511	haha19951227	37	0.027027	0	1	23	0	0.0434783	0.0434783	0	1	60	2	0.0166667	0.0333333	2	2.6898	7700.54	1	1	0	False	False	False	False	False	0	False	False	False	No
3726	512	s95229522	5	0.2	0	1	5	0	0.2	0.2	0	1	10	2	0.1	0.2	2	1.5	2592.25	1	0	0	False	False	False	False	False	3	False	False	False	No
129	513	c5sfkc	4	0.25	1	0	0	0	0	0	0	0	4	1	0.25	0.25	0	0	29	2	0	2.46083e-05	True	False	False	False	False	4	False	False	False	Yes
1196	514	a0933545022	134	0.0149254	0	2	131	0	0.0152672	0.0152672	0	2	265	4	0.00754717	0.0150943	4	3.19445	3123.26	1	0	0	False	False	False	False	False	3	False	False	False	No
2466	515	hahaha59408	38	0.0526316	0	2	40	0	0.05	0.05	0	2	78	4	0.025641	0.0512821	4	3.21584	6162.89	1	0	0	False	False	False	False	False	3	False	False	False	No
3727	516	s952834	183	0.0382514	6	1	184	0	0.0380435	0.0380435	6	1	367	14	0.0190736	0.0381471	2	3.23958	2069.82	1	0	0	False	False	False	False	False	3	False	False	False	No
130	517	c7858t	2	0	0	0	0	0	0	0	0	0	2	0	0	0	0	0	21	1	4	8.01442e-08	False	False	False	False	False	0	False	False	False	Yes
1197	518	a0936166305	46	0.0434783	1	1	47	0	0.0425532	0.0425532	1	1	93	4	0.0215054	0.0430108	2	2.77335	1035.21	1	0	0	False	False	False	False	False	3	False	False	False	No
2467	519	hailylin	88	0.0454545	0	4	92	0	0.0543478	0.0543478	0	5	180	9	0.0222222	0.05	9	3.33977	4735.66	1	0	0	False	False	False	False	False	3	False	False	False	No
3728	520	s956118	1	0	0	0	1	0	0	0	0	0	2	0	0	0	0	0	855	1	0	0	False	False	False	False	False	3	False	False	False	No
131	521	c91639563	27	0	0	0	30	0	0	0	0	0	57	0	0	0	0	0	1279	1	0	0	False	False	False	False	False	3	False	False	False	Yes
1198	522	a0955752767	8	0	0	0	6	0	0	0	0	0	14	0	0	0	0	2.25163	6604.17	1	0	0	False	False	False	False	False	3	False	False	False	No
2468	523	halajoy	241	0.0912863	22	0	321	0	0.0996885	0.0996885	32	0	562	54	0.0391459	0.0960854	0	2.41979	735.69	1	1	0	False	False	False	False	False	0	False	False	False	No
3729	524	s96130009	31	0	0	0	18	0	0	0	0	0	49	0	0	0	0	2.75343	6512.29	1	1	0	False	False	False	False	False	0	False	False	False	No
132	525	carzykids1016	56	0	0	0	96	0	0	0	0	0	152	0	0	0	0	1.52193	2333	5	0	1.66634e-07	True	True	True	True	False	4	False	False	False	Yes
1199	526	a0955765172999	627	0.0653907	0	41	629	0	0.0667727	0.0667727	0	42	1256	83	0.0326433	0.0660828	83	3.09016	1323.66	1	0	0	False	False	False	False	False	3	False	False	False	No
2469	527	hamywu222	25	0.04	0	1	23	0	0	0	0	0	48	1	0.0208333	0.0208333	1	3.24145	13447.2	1	0	0	False	False	False	False	False	3	False	False	False	No
3730	528	s99441125	42	0	0	0	39	0	0	0	0	0	81	0	0	0	0	3.08142	4918.26	1	0	0	False	False	False	False	False	3	False	False	False	No
133	529	cassarshux	19	0.842105	16	0	3	0	0.333333	0.333333	1	0	22	17	0.727273	0.772727	0	0.918296	37.6667	1	6	2.40433e-07	False	False	False	False	False	3	False	False	False	Yes
1200	530	a0981103534	29	0.413793	0	12	17	0	0.470588	0.470588	0	8	46	20	0.26087	0.434783	20	3.10689	10703.7	1	0	0	False	False	False	False	False	3	False	False	False	No
2470	531	han-yun	10	0	0	0	10	0	0	0	0	0	20	0	0	0	0	2.23593	3840	1	0	0	False	False	False	False	False	3	False	False	False	No
3731	532	sa2462	6	0	0	0	2	0	0	0	0	0	8	0	0	0	0	1	2850.25	1	0	0	False	False	False	False	False	3	False	False	False	No
134	533	ch388	1	0	0	0	0	0	0	0	0	0	1	0	0	0	0	0	5	1	1	0	False	False	False	False	False	0	False	False	False	Yes
1201	534	a0982578151	2	0	0	0	2	0	0	0	0	0	4	0	0	0	0	1	4719	1	0	0	False	False	False	False	False	3	False	False	False	No
2471	535	hank_plus	61	0.0163934	1	0	67	0	0.0149254	0.0149254	1	0	128	2	0.0078125	0.015625	0	2.78291	650.68	1	0	0	False	False	False	False	False	3	False	False	False	No
3732	536	sabc555	3	0	0	0	3	0	0	0	0	0	6	0	0	0	0	0.918296	199.333	1	0	0	False	False	False	False	False	3	False	False	False	No
136	537	chen123c	10	0.4	4	0	10	0	0.4	0.4	4	0	20	8	0.2	0.4	0	0	13.3333	1	14	1.60288e-06	False	False	False	False	False	3	False	False	False	Yes
1202	538	a0983348580	1	0	0	0	3	0	0	0	0	0	4	0	0	0	0	0	21150	1	0	0	False	False	False	False	False	3	False	False	False	No
2472	539	hank2661850	129	0	0	0	132	0	0	0	0	0	261	0	0	0	0	3.29384	6063.85	1	0	0	False	False	False	False	False	3	False	False	False	No
3733	540	sabout0216	28	0	0	0	31	0	0	0	0	0	59	0	0	0	0	3.21288	4010.24	1	0	0	False	False	False	False	False	3	False	False	False	No
137	541	cheneshou	5	1	5	0	0	0	0	0	0	0	5	5	1	1	0	0	0	0	0	0	False	False	False	False	False	0	False	False	False	Yes
1203	542	a0985982826	1	0	0	0	1	0	0	0	0	0	2	0	0	0	0	0	22	1	0	0	False	False	False	False	False	3	False	False	False	No
2473	543	hankyu1012	1	0	0	0	2	0	0	0	0	0	3	0	0	0	0	0	8	1	0	0	False	False	False	False	False	3	False	False	False	No
3734	544	sad40207	86	0	0	0	83	0	0	0	0	0	169	0	0	0	0	2.56926	16311.2	1	0	0	False	False	False	False	False	3	False	False	False	No
138	545	chlwodls	50	0.92	46	0	2	0	0	0	0	0	52	46	0.884615	0.884615	0	1.5	72.5	1	8	4.80865e-07	False	False	False	False	False	3	False	False	False	Yes
1204	546	a0987016778	3	0	0	0	4	0	0	0	0	0	7	0	0	0	0	1.58496	1934	1	1	0	False	False	False	False	False	0	False	False	False	No
2474	547	hans6478	62	0	0	0	65	0	0	0	0	0	127	0	0	0	0	3.02483	4071.41	1	0	0	False	False	False	False	False	3	False	False	False	No
3735	548	sagafreki	35	0.114286	0	4	36	0	0.0833333	0.0833333	0	3	71	7	0.056338	0.0985915	7	3.02864	9086.06	1	0	0	False	False	False	False	False	3	False	False	False	No
139	549	cho7675	6	1	6	0	0	0	0	0	0	0	6	6	1	1	0	0	0	0	0	0	False	False	False	False	False	0	False	False	False	Yes
1205	550	a0988964465	4	0	0	0	6	0	0	0	0	0	10	0	0	0	0	2	4865.5	1	0	0	False	False	False	False	False	3	False	False	False	No
2476	551	hanweiwang0504	2	0	0	0	2	0	0	0	0	0	4	0	0	0	0	0	19	1	0	0	False	False	False	False	False	3	False	False	False	No
3736	552	sagittarius88	130	0.00769231	0	1	124	0	0.00806452	0.00806452	0	1	254	2	0.00393701	0.00787402	2	3.1679	2613.75	2	0	2.27966e-05	True	False	False	False	False	4	False	False	False	No
140	553	chui0106	30	0.3	9	0	0	0	0	0	0	0	30	9	0.3	0.3	0	0.847585	36.9	2	54.1046	0.00380375	True	False	False	False	False	4	False	False	False	Yes
1206	554	a0989124220	66	0.0151515	1	0	65	0	0.0153846	0.0153846	1	0	131	2	0.00763359	0.0152672	0	3.19749	2275.12	1	0	0	False	False	False	False	False	0	False	False	False	No
2477	555	hao23	1192	0.158557	56	133	1256	0	0.159236	0.159236	65	135	2448	389	0.0772059	0.158905	268	3.02764	1217.6	1	0	0	False	False	False	False	False	3	False	False	False	No
3737	556	sai7018	54	0	0	0	51	0	0	0	0	0	105	0	0	0	0	2.6898	6033.38	1	0	0	False	False	False	False	False	3	False	False	False	No
141	557	chui080	7	0	0	0	0	0	0	0	0	0	7	0	0	0	0	0.863121	20.8571	3	0	0.000464196	True	True	False	False	False	4	False	False	False	Yes
1207	558	a0aa7a60	15	0	0	0	2	0	0	0	0	0	17	0	0	0	0	2.25163	23538.2	1	0	0	False	False	False	False	False	3	False	False	False	No
2478	559	happpy06	1	0	0	0	1	0	0	0	0	0	2	0	0	0	0	0	1377	1	0	0	False	False	False	False	False	3	False	False	False	No
3738	560	saikirin	1	0	0	0	2	0	0	0	0	0	3	0	0	0	0	0	2879	1	0	0	False	False	False	False	False	3	False	False	False	No
142	561	chui084	28	0.357143	10	0	7	0	0	0	0	0	35	10	0.285714	0.285714	0	0	11	1	16	2.24404e-06	False	False	False	False	False	3	False	False	False	Yes
1208	562	a101346	23	0	0	0	26	0	0	0	0	0	49	0	0	0	0	2.97084	8949.84	1	0	0	False	False	False	False	False	3	False	False	False	No
2479	563	happy_tzu	252	0.174603	10	34	272	0	0.172794	0.172794	13	34	524	91	0.0839695	0.173664	68	3.06421	2386.7	1	0	0	False	False	False	False	False	3	False	False	False	No
3739	564	sakjdgdkj	2	0	0	0	3	0	0	0	0	0	5	0	0	0	0	0	16	1	0	0	False	False	False	False	False	3	False	False	False	No
143	565	chujooar	45	0	0	0	1	0	0	0	0	0	46	0	0	0	0	0	4	3	17.6209	1.46931e-06	True	True	False	False	False	4	False	False	False	Yes
1209	566	a1123qwe	355	0.0169014	6	0	175	0	0.0457143	0.0457143	8	0	530	14	0.0113208	0.0264151	0	2.94451	2112.3	1	0	0	False	False	False	False	False	3	False	False	False	No
2480	567	happy182517	66	0	0	0	68	0	0	0	0	0	134	0	0	0	0	2.73175	1783.56	1	1	0	False	False	False	False	False	0	False	False	False	No
3740	568	sakura10242001	24	0	0	0	22	0	0	0	0	0	46	0	0	0	0	2.96596	4033.75	1	0	0	False	False	False	False	False	3	False	False	False	No
144	569	cihar	41	0	0	0	0	0	0	0	0	0	41	0	0	0	0	0	2.8	3	8.78583	2.37093e-06	True	True	False	False	False	4	False	False	False	Yes
1210	570	a113362002	66	0.0757576	0	5	59	0	0.0847458	0.0847458	0	5	125	10	0.04	0.08	10	3.21802	2367.12	1	0	0	False	False	False	False	False	3	False	False	False	No
2481	571	happy20hahaha	6	0	0	0	2	0	0	0	0	0	8	0	0	0	0	2.58496	4691.5	1	0	0	False	False	False	False	False	3	False	False	False	No
3741	572	sakura2831	20	0	0	0	23	0	0	0	0	0	43	0	0	0	0	2.60624	3786.53	1	0	0	False	False	False	False	False	3	False	False	False	No
145	573	clays	28	0.5	14	0	17	0	0.882353	0.882353	15	0	45	29	0.311111	0.644444	0	0.371232	17.0714	1	28	7.29312e-06	False	False	False	False	False	3	False	False	False	Yes
1211	574	a1210169	2	0	0	0	2	0	0	0	0	0	4	0	0	0	0	1	10310.5	1	0	0	False	False	False	False	False	3	False	False	False	No
2482	575	happy860423	55	0	0	0	61	0	0	0	0	0	116	0	0	0	0	2.86767	4054.7	1	0	0	False	False	False	False	False	3	False	False	False	No
3742	576	sakuraj1025	68	0.205882	7	7	69	0	0.202899	0.202899	7	7	137	28	0.10219	0.20438	14	3.00014	2139.22	1	0	0	False	False	False	False	False	3	False	False	False	No
146	577	climeslux	5	1	5	0	0	0	0	0	0	0	5	5	1	1	0	0	0	0	0	0	False	False	False	False	False	0	False	False	False	Yes
1212	578	a121314h	6	0	0	0	16	0	0	0	0	0	22	0	0	0	0	2.25163	1762.83	3	0	0.000899153	True	True	False	False	False	4	False	False	False	No
2483	579	hareem0319	12	0	0	0	13	0	0	0	0	0	25	0	0	0	0	2.73216	5050.73	1	0	0	False	False	False	False	False	3	False	False	False	No
3743	580	salazar	156	0.00641026	0	1	158	0	0.0126582	0.0126582	0	2	314	3	0.00318471	0.00955414	3	3.35735	3641.53	1	1	0	False	False	False	False	False	0	False	False	False	No
147	581	cndwjdfhqq	2	0	0	0	2	0	0	0	0	0	4	0	0	0	0	0	40	1	1	0	False	False	False	False	False	0	False	False	False	Yes
1213	582	a1221565177	20	0	0	0	41	0	0	0	0	0	61	0	0	0	0	0.650022	29.8333	3	0	4.99797e-05	True	True	False	False	False	4	False	False	False	No
2484	583	hason830812	24	0.0416667	0	1	24	0	0	0	0	0	48	1	0.0208333	0.0208333	1	2.35988	9169.57	1	0	0	False	False	False	False	False	3	False	False	False	No
3744	584	salem331303	6	0	0	0	8	0	0	0	0	0	14	0	0	0	0	2.25163	4229.17	1	0	0	False	False	False	False	False	3	False	False	False	No
148	585	cohny	4	1	4	0	0	0	0	0	0	0	4	4	1	1	0	0	0	0	0	0	False	False	False	False	False	0	False	False	False	Yes
1214	586	a122313776	3	0.333333	0	1	4	0	0.25	0.25	0	1	7	2	0.142857	0.285714	2	0	2.5	1	0	1.12202e-06	False	False	False	False	False	3	False	False	False	No
2485	587	hatashi	9	0.111111	0	1	11	0	0	0	0	0	20	1	0.05	0.05	1	2.40564	9476.62	1	0	0	False	False	False	False	False	3	False	False	False	No
3745	588	salepass	393	0.279898	70	40	443	0	0.252822	0.252822	72	40	836	222	0.131579	0.26555	80	2.90749	1293.98	1	0	0	False	False	False	False	False	3	False	False	False	No
149	589	coraxc	2	0	0	0	0	0	0	0	0	0	2	0	0	0	0	0	21.5	1	4	8.01442e-08	False	False	False	False	False	3	False	False	False	Yes
1215	590	a1231027	10	0	0	0	11	0	0	0	0	0	21	0	0	0	0	2	4100.5	1	0	0	False	False	False	False	False	3	False	False	False	No
2486	591	hatsukishiou666	86	0	0	0	85	0	0	0	0	0	171	0	0	0	0	3.23781	3008.88	1	0	0	False	False	False	False	False	3	False	False	False	No
3746	592	sales02	846	0.152482	122	7	1086	0	0.137201	0.137201	142	7	1932	278	0.0667702	0.143892	14	2.0191	120.885	1	0	0	False	False	False	False	False	3	False	False	False	No
150	593	coyhdgsmh924	5	0	0	0	7	0	0	0	0	0	12	0	0	0	0	0	7.2	2	9.24359	8.45521e-06	True	False	False	False	False	4	False	False	False	Yes
1216	594	a123123123456	61	0	0	0	57	0	0	0	0	0	118	0	0	0	0	3.05331	6436.09	1	0	0	False	False	False	False	False	3	False	False	False	No
2487	595	hawie168	12	0	0	0	11	0	0	0	0	0	23	0	0	0	0	2.36852	992.455	1	0	0	False	False	False	False	False	3	False	False	False	No
3747	596	sally30308	7	0	0	0	8	0	0	0	0	0	15	0	0	0	0	2	7371.5	1	1	0	False	False	False	False	False	0	False	False	False	No
151	597	crapseyugu	5	1	5	0	0	0	0	0	0	0	5	5	1	1	0	0	0	0	0	0	False	False	False	False	False	0	False	False	False	Yes
1217	598	a12341234d	4	0	0	0	2	0	0	0	0	0	6	0	0	0	0	1.58496	321	1	0	0	False	False	False	False	False	3	False	False	False	No
2488	599	hayabusa67	50	0	0	0	52	0	0	0	0	0	102	0	0	0	0	3.0192	1611	1	1	0	False	False	False	False	False	0	False	False	False	No
3748	600	sallyflute	19	0	0	0	22	0	0	0	0	0	41	0	0	0	0	2.07416	1024.36	1	0	0	False	False	False	False	False	3	False	False	False	No
152	601	crocs_tw	77	0.103896	8	0	67	0	0.0895522	0.0895522	6	0	144	14	0.0555556	0.0972222	0	1.88961	102.673	2	98.2166	0.00196543	True	False	False	False	False	3	False	False	False	Yes
1218	602	a12343421	3	0	0	0	2	0	0	0	0	0	5	0	0	0	0	1.58496	2839.67	1	0	0	False	False	False	False	False	3	False	False	False	No
2490	603	hazen8958	16	0	0	0	18	0	0	0	0	0	34	0	0	0	0	2.66123	6872.23	1	0	0	False	False	False	False	False	3	False	False	False	No
3749	604	sallyponya	16	0	0	0	17	0	0	0	0	0	33	0	0	0	0	2.05881	1266.78	1	0	0	False	False	False	False	False	3	False	False	False	No
153	605	cs2434r7	1	0	0	0	0	0	0	0	0	0	1	0	0	0	0	0	6	1	1	0	False	False	False	False	False	0	False	False	False	Yes
1219	606	a123916	63	0	0	0	57	0	0	0	0	0	120	0	0	0	0	3.13355	3036.5	1	0	6.64395e-05	False	False	False	False	False	3	False	False	False	No
2491	607	hcdh0712	82	0	0	0	85	0	0	0	0	0	167	0	0	0	0	3.34926	8470.4	1	0	0	False	False	False	False	False	3	False	False	False	No
3751	608	sam1386	40	0.025	0	1	41	0	0.0243902	0.0243902	0	1	81	2	0.0123457	0.0246914	2	3.00448	5864.52	1	1	0	False	False	False	False	False	0	False	False	False	No
154	609	csdf387	1	0	0	0	0	0	0	0	0	0	1	0	0	0	0	0	4	1	1	0	False	False	False	False	False	0	False	False	False	Yes
1220	610	a123jiu	94	0.12766	12	0	116	0	0.103448	0.103448	12	0	210	24	0.0571429	0.114286	0	2.32638	498.161	1	0	0	False	False	False	False	False	3	False	False	False	No
2492	611	hcg0115	208	0.00961538	1	1	207	0	0.00966184	0.00966184	1	1	415	4	0.00481928	0.00963855	2	3.26506	4044.72	1	0	0	False	False	False	False	False	3	False	False	False	No
3752	612	sam632621	6658	0.0889156	589	3	7870	0	0.0878018	0.0878018	688	3	14528	1283	0.0407489	0.0883122	6	1.89144	112.976	1	0	0	False	False	False	False	False	3	False	False	False	No
155	613	csfqqm46	1	0	0	0	0	0	0	0	0	0	1	0	0	0	0	0	23	1	1	0	False	False	False	False	False	0	False	False	False	Yes
1221	614	a125324445	7	0	0	0	6	0	0	0	0	0	13	0	0	0	0	1.9183	8351.5	1	0	0	False	False	False	False	False	3	False	False	False	No
2493	615	hdsf8sd	7	0	0	0	42	0	0	0	0	0	49	0	0	0	0	1.44882	155.714	3	0	8.35111e-07	True	True	False	False	False	4	False	False	False	No
3753	616	samess	347	0.0172911	5	1	353	0	0.01983	0.01983	6	1	700	13	0.00857143	0.0185714	2	3.27356	2861.65	1	0	0	False	False	False	False	False	3	False	False	False	No
156	617	csxffdyeb951	320	0.209375	67	0	533	0	0.318949	0.318949	170	0	853	237	0.0785463	0.277843	0	2.34995	216.241	1	116	0.000132478	False	False	False	False	False	3	False	False	False	Yes
1222	618	a1262934	4	0.75	0	3	10	0	0.3	0.3	0	3	14	6	0.214286	0.428571	6	0	2964	1	0	0	False	False	False	False	False	3	False	False	False	No
2494	619	he03001514	9	0.666667	0	6	6	0	0.833333	0.833333	0	5	15	11	0.4	0.733333	11	1	12356	1	0	0	False	False	False	False	False	3	False	False	False	No
3754	620	sameway81	16	0	0	0	17	0	0	0	0	0	33	0	0	0	0	2.08496	5225.58	1	0	0	False	False	False	False	False	3	False	False	False	No
157	621	cvbnna	1	0	0	0	1	0	0	0	0	0	2	0	0	0	0	0	17	1	1	0	False	False	False	False	False	0	False	False	False	Yes
1223	622	a128449672	97	0.0412371	3	1	102	0	0.0392157	0.0392157	3	1	199	8	0.0201005	0.040201	2	3.34588	5903.88	1	1	0	False	False	False	False	False	0	False	False	False	No
2495	623	heavenman002	103	0.135922	0	14	60	0	0.0166667	0.0166667	0	1	163	15	0.0858896	0.0920245	15	3.05792	3029.42	1	0	0	False	False	False	False	False	3	False	False	False	No
3755	624	sammi1972	11	0.0909091	1	0	13	0	0.0769231	0.0769231	1	0	24	2	0.0416667	0.0833333	0	2.72548	2259.78	1	0	0	False	False	False	False	False	3	False	False	False	No
158	625	cwenjund	5	0.8	4	0	0	0	0	0	0	0	5	4	0.8	0.8	0	0	19	1	0	0	False	False	False	False	False	3	False	False	False	Yes
1224	626	a12996633	1	0	0	0	7	0	0.142857	0.142857	0	1	8	1	0	0.125	1	0	12944	1	0	0	False	False	False	False	False	3	False	False	False	No
2496	627	hellcomet	135	0	0	0	142	0	0.00704225	0.00704225	1	0	277	1	0	0.00361011	0	3.335	3910.61	1	0	0	False	False	False	False	False	3	False	False	False	No
3756	628	samn3614	6	0	0	0	5	0	0	0	0	0	11	0	0	0	0	2.25163	4736.67	1	0	0	False	False	False	False	False	3	False	False	False	No
159	629	cxbnkjfhrfr	2	0	0	0	1	0	0	0	0	0	3	0	0	0	0	0	64	1	1	0	False	False	False	False	False	0	False	False	False	Yes
1225	630	a135k246	14	0.0714286	0	1	15	0	0.0666667	0.0666667	0	1	29	2	0.0344828	0.0689655	2	2.32193	30922.2	1	0	0	False	False	False	False	False	3	False	False	False	No
2497	631	hencr	2	0	0	0	2	0	0	0	0	0	4	0	0	0	0	0	8.5	1	0	0	False	False	False	False	False	3	False	False	False	No
3757	632	samuel1006	193	0.00518135	0	1	190	0	0.00526316	0.00526316	0	1	383	2	0.00261097	0.00522193	2	3.24332	2180.99	1	0	0	False	False	False	False	False	3	False	False	False	No
160	633	cxvdf3	1	0	0	0	1	0	0	0	0	0	2	0	0	0	0	0	30	1	1	0	False	False	False	False	False	0	False	False	False	Yes
1226	634	a139746285	11	0	0	0	13	0	0	0	0	0	24	0	0	0	0	2.50326	4801.33	1	1	0	False	False	False	False	False	0	False	False	False	No
2498	635	henry020688	20	0.05	0	1	18	0	0	0	0	0	38	1	0.0263158	0.0263158	1	2.82218	5381	1	0	0	False	False	False	False	False	3	False	False	False	No
3758	636	samuelchiu81	31	0.0322581	0	1	28	0	0	0	0	0	59	1	0.0169492	0.0169492	1	2.80681	1954	1	1	0	False	False	False	False	False	0	False	False	False	No
161	637	d156135302	6	0.5	3	0	0	0	0	0	0	0	6	3	0.5	0.5	0	0	1	1	1	0	False	False	False	False	False	0	False	False	False	Yes
1227	638	a1594king	5	0	0	0	4	0	0	0	0	0	9	0	0	0	0	1.5	599.75	1	0	0	False	False	False	False	False	3	False	False	False	No
2499	639	henry7712943	25	0	0	0	21	0	0	0	0	0	46	0	0	0	0	2.54926	3283.67	1	0	0	False	False	False	False	False	3	False	False	False	No
3759	640	sanyoojo	247	0.319838	31	48	345	0	0.228986	0.228986	41	38	592	158	0.133446	0.266892	86	1.83775	136.201	1	0	0	False	False	False	False	False	3	False	False	False	No
162	641	d3455434	2	0	0	0	0	0	0	0	0	0	2	0	0	0	0	0	2	1	0	0	False	False	False	False	False	3	False	False	False	Yes
1228	642	a16515151	9	0	0	0	17	0	0	0	0	0	26	0	0	0	0	2.28104	11758.6	1	0	0	False	False	False	False	False	3	False	False	False	No
2500	643	herry7723	3	0	0	0	1	0	0	0	0	0	4	0	0	0	0	1.58496	701.333	1	1	0	False	False	False	False	False	0	False	False	False	No
3760	644	sarah771110	2	0	0	0	3	0	0	0	0	0	5	0	0	0	0	1	205.5	1	0	0	False	False	False	False	False	3	False	False	False	No
163	645	d4189498	1	1	1	0	0	0	0	0	0	0	1	1	1	1	0	0	0	0	0	0	False	False	False	False	False	0	False	False	False	Yes
1229	646	a1688251224	7	0	0	0	7	0	0	0	0	0	14	0	0	0	0	2.12809	1865.29	1	0	0	False	False	False	False	False	3	False	False	False	No
2501	647	hfjjh68	32	0.375	0	12	183	0	0.601093	0.601093	0	110	215	122	0.055814	0.567442	122	0.721928	39.6	1	0	6.49168e-06	False	False	False	False	False	3	False	False	False	No
3761	648	sarah771175	4	0	0	0	2	0	0	0	0	0	6	0	0	0	0	1.5	1317.25	1	0	0	False	False	False	False	False	3	False	False	False	No
164	649	d43545	2	1	2	0	0	0	0	0	0	0	2	2	1	1	0	0	0	0	0	0	False	False	False	False	False	0	False	False	False	Yes
1230	650	a19941006	4	0	0	0	14	0	0.0714286	0.0714286	0	1	18	1	0	0.0555556	1	1	7524.5	2	0	0.000437098	True	False	False	False	False	4	False	False	False	No
2503	651	hghjeuff	57	0.140351	0	8	60	0	0.133333	0.133333	0	8	117	16	0.0683761	0.136752	16	3.35416	5457	1	0	0	False	False	False	False	False	3	False	False	False	No
3762	652	sarana_zx0	357	0	0	0	360	0	0	0	0	0	717	0	0	0	0	3.0921	5392.32	1	0	0	False	False	False	False	False	3	False	False	False	No
165	653	d4436660	8	0.75	6	0	3	0	0.333333	0.333333	1	0	11	7	0.545455	0.636364	0	0	20.5	1	3	6.64395e-05	False	False	False	False	False	3	False	False	False	Yes
1231	654	a2027166	1	0	0	0	6	0	0	0	0	0	7	0	0	0	0	0	1654	1	0	0	False	False	False	False	False	3	False	False	False	No
2504	655	hgjhtufkty	1	0	0	0	25	0	0	0	0	0	26	0	0	0	0	0	82	3	0	8.35111e-07	True	True	False	False	False	4	False	False	False	No
3763	656	sas00230777	20	0	0	0	23	0	0	0	0	0	43	0	0	0	0	3.02193	4726.6	1	0	0	False	False	False	False	False	3	False	False	False	No
166	657	d4564511110	2	0	0	0	24	0	0	0	0	0	26	0	0	0	0	0	13	4	0	0.000390456	True	True	True	False	False	4	False	False	False	Yes
1232	658	a20333a	242	0.0289256	0	7	132	0	0.0378788	0.0378788	0	5	374	12	0.0187166	0.0320856	12	2.9425	1030.87	2	0	2.27966e-05	True	False	False	False	False	4	False	False	False	No
2506	659	hgrejhyrtjhyrt5	1	0	0	0	29	0	0	0	0	0	30	0	0	0	0	0	82	2	0	4.6935e-08	True	False	False	False	False	4	False	False	False	No
3764	660	sasa_lan2001	5	0	0	0	7	0	0	0	0	0	12	0	0	0	0	1.92193	1145	1	0	0	False	False	False	False	False	3	False	False	False	No
167	661	d54502232	4	0	0	0	3	0	0.333333	0.333333	1	0	7	1	0	0.142857	0	1.58496	61	1	6	2.40433e-07	False	False	False	False	False	3	False	False	False	Yes
1233	662	a20430153	23	0	0	0	22	0	0	0	0	0	45	0	0	0	0	2.88955	3526.06	1	0	0	False	False	False	False	False	3	False	False	False	No
2507	663	hgrejrk	1	0	0	0	30	0	0	0	0	0	31	0	0	0	0	0	82	2	0	4.6935e-08	True	False	False	False	False	4	False	False	False	No
3765	664	sasdw2	18	0.444444	0	8	37	0	0.378378	0.378378	0	14	55	22	0.145455	0.4	22	0	16	1	21	1.08996e-05	False	False	False	False	False	3	False	False	False	No
168	665	d6560222	2	0	0	0	2	0	0	0	0	0	4	0	0	0	0	0	6	1	0	4.80865e-07	False	False	False	False	False	3	False	False	False	Yes
1234	666	a207162000	60	0.0166667	0	1	63	0	0	0	0	0	123	1	0.00813008	0.00813008	1	3.06666	4770.61	1	0	0	False	False	False	False	False	3	False	False	False	No
2508	667	hgtrytk	1	0	0	0	29	0	0	0	0	0	30	0	0	0	0	0	82	3	0	8.35111e-07	True	True	False	False	False	4	False	False	False	No
3766	668	sashman1214	84	0.0357143	3	0	76	0	0.0263158	0.0263158	2	0	160	5	0.01875	0.03125	0	3.10439	1592.88	1	0	0	False	False	False	False	False	3	False	False	False	No
169	669	d856515616	4	1	4	0	0	0	0	0	0	0	4	4	1	1	0	0	0	0	0	0	False	False	False	False	False	0	False	False	False	Yes
1235	670	a217217	19	0.368421	0	7	21	0	0.52381	0.52381	0	11	40	18	0.175	0.45	18	2.11808	3446.09	1	1	0	False	False	False	False	False	0	False	False	False	No
2509	671	hh999	164	0.0609756	10	0	179	0	0.0614525	0.0614525	11	0	343	21	0.0291545	0.0612245	0	3.23739	2050.95	1	0	0	False	False	False	False	False	3	False	False	False	No
3767	672	satori80413	8	0	0	0	8	0	0	0	0	0	16	0	0	0	0	1.75	6601.38	1	0	0	False	False	False	False	False	3	False	False	False	No
170	673	d99452130	2	0	0	0	19	0	0	0	0	0	21	0	0	0	0	0	18	4	0	0.000458623	True	True	True	False	False	4	False	False	False	Yes
1236	674	a218305	2	0	0	0	6	0	0	0	0	0	8	0	0	0	0	1	7728	1	0	0	False	False	False	False	False	3	False	False	False	No
2510	675	hi_way0417	150	0.04	4	2	152	0	0.0394737	0.0394737	4	2	302	12	0.0198675	0.0397351	4	3.00099	1045.14	1	0	0	False	False	False	False	False	3	False	False	False	No
3768	676	satum	10	0.1	0	1	5	0	0.2	0.2	0	1	15	2	0.0666667	0.133333	2	1.25163	598.833	1	0	0	False	False	False	False	False	3	False	False	False	No
171	677	dairlkon	12	0.833333	10	0	6	0	0.833333	0.833333	5	0	18	15	0.555556	0.833333	0	0	31.5	1	4	8.01442e-08	False	False	False	False	False	3	False	False	False	Yes
1237	678	a21xz02	2	0	0	0	2	0	0	0	0	0	4	0	0	0	0	1	175.5	1	0	0	False	False	False	False	False	3	False	False	False	No
2511	679	hiei123	40	0	0	0	39	0	0	0	0	0	79	0	0	0	0	2.68872	815.667	1	0	0	False	False	False	False	False	3	False	False	False	No
3769	680	sauhung	18	0.111111	0	2	5	0	0	0	0	0	23	2	0.0869565	0.0869565	2	2.61058	4623.07	1	0	0	False	False	False	False	False	3	False	False	False	No
172	681	dasjfds89fsdf	1	0	0	0	0	0	0	0	0	0	1	0	0	0	0	0	22	1	0	0	False	False	False	False	False	3	False	False	False	Yes
1238	682	a220259	65	0	0	0	67	0	0	0	0	0	132	0	0	0	0	2.92407	4661.23	1	0	0	False	False	False	False	False	3	False	False	False	No
2512	683	hikawa126	34	0	0	0	35	0	0	0	0	0	69	0	0	0	0	3.32066	5395.42	1	0	0	False	False	False	False	False	3	False	False	False	No
3770	684	sawyerx	2	0	0	0	2	0	0	0	0	0	4	0	0	0	0	0	8.5	1	0	0	False	False	False	False	False	3	False	False	False	No
173	685	ddfcxbg	33	0.424242	14	0	30	0	0.433333	0.433333	13	0	63	27	0.222222	0.428571	0	1.32161	100.059	2	34.1225	0.000115662	True	False	False	False	False	4	False	False	False	Yes
1239	686	a22066877	3	0	0	0	1	0	0	0	0	0	4	0	0	0	0	1.58496	4447.67	1	0	0	False	False	False	False	False	0	False	False	False	No
2513	687	hiko6895	161	0.10559	16	1	178	0	0.0955056	0.0955056	17	0	339	34	0.0501475	0.100295	1	1.99382	432.462	1	0	0	False	False	False	False	False	3	False	False	False	No
3771	688	sazabi7963	251	0	0	0	224	0	0	0	0	0	475	0	0	0	0	3.22523	3114.98	1	0	0	False	False	False	False	False	3	False	False	False	No
174	689	dduva	11	0	0	0	0	0	0	0	0	0	11	0	0	0	0	0	9.83333	1	12	1.20216e-06	False	False	False	False	False	3	False	False	False	Yes
1240	690	a226677889413a	7	0	0	0	2	0	0	0	0	0	9	0	0	0	0	1.9183	4082	1	0	0	False	False	False	False	False	3	False	False	False	No
2514	691	hinny053	147	0	0	0	148	0	0	0	0	0	295	0	0	0	0	3.0822	1440.66	1	0	0	False	False	False	False	False	3	False	False	False	No
3772	692	sazabigundam	3	0	0	0	3	0	0	0	0	0	6	0	0	0	0	0	1258	1	0	0	False	False	False	False	False	3	False	False	False	No
175	693	deprattvbqj	14	0.0714286	1	0	1	0	0	0	0	0	15	1	0.0666667	0.0666667	0	0.413817	21.4167	1	25.2	1.13003e-05	False	False	False	False	False	3	False	False	False	Yes
1241	694	a230357999	48	0.104167	1	4	38	0	0.0789474	0.0789474	1	2	86	8	0.0581395	0.0930233	6	2.90381	1683.79	1	0	0	False	False	False	False	False	3	False	False	False	No
2515	695	hiphop0631	8	0	0	0	9	0	0	0	0	0	17	0	0	0	0	1.9183	9243.83	1	0	0	False	False	False	False	False	3	False	False	False	No
3773	696	sbirddy	101	0	0	0	103	0	0	0	0	0	204	0	0	0	0	3.29358	3602.46	1	0	0	False	False	False	False	False	3	False	False	False	No
176	697	desihowgfvjre	1	0	0	0	0	0	0	0	0	0	1	0	0	0	0	0	50	1	1	0	False	False	False	False	False	0	False	False	False	Yes
1242	698	a23117679	9	0	0	0	1	0	0	0	0	0	10	0	0	0	0	2.6416	7704.67	1	0	0	False	False	False	False	False	3	False	False	False	No
2516	699	hj56	11	0	0	0	33	0	0	0	0	0	44	0	0	0	0	1.86763	148.455	3	0	8.35111e-07	True	True	False	False	False	4	False	False	False	No
3774	700	sbright	9	0	0	0	9	0	0	0	0	0	18	0	0	0	0	1.75	1564.38	1	0	0	False	False	False	False	False	3	False	False	False	No
177	701	devasierzai	5	1	5	0	0	0	0	0	0	0	5	5	1	1	0	0	0	0	0	0	False	False	False	False	False	0	False	False	False	Yes
1243	702	a23568s940520	95	0.0105263	1	0	100	0	0.01	0.01	1	0	195	2	0.00512821	0.0102564	0	3.40465	6143.58	1	0	0	False	False	False	False	False	3	False	False	False	No
2517	703	hjiuy77	2	0	0	0	3	0	0	0	0	0	5	0	0	0	0	0	205	1	0	0	False	False	False	False	False	3	False	False	False	No
3775	704	sc031168	88	0.0113636	0	1	93	0	0.0107527	0.0107527	0	1	181	2	0.00552486	0.0110497	2	3.0939	3933.65	1	0	0	False	False	False	False	False	3	False	False	False	No
178	705	dewipfoewfre	4	0	0	0	3	0	0	0	0	0	7	0	0	0	0	0.811278	32	1	8	4.80865e-07	False	False	False	False	False	3	False	False	False	Yes
1244	706	a23753201	56	0	0	0	47	0	0	0	0	0	103	0	0	0	0	3.17177	3111	1	0	0	False	False	False	False	False	3	False	False	False	No
2518	707	hkaa4479	60	0.0166667	0	1	51	0	0	0	0	0	111	1	0.00900901	0.00900901	1	2.78591	1062.69	1	0	0	False	False	False	False	False	3	False	False	False	No
3776	708	sc5205205520	35	0	0	0	27	0	0	0	0	0	62	0	0	0	0	2.90701	6886.15	1	0	0	False	False	False	False	False	3	False	False	False	No
179	709	dewopufregtrgt	2	0	0	0	1	0	0	0	0	0	3	0	0	0	0	0	5	1	1	0	False	False	False	False	False	3	False	False	False	Yes
1245	710	a250792	1	0	0	0	5	0	0	0	0	0	6	0	0	0	0	0	1246	1	0	0	False	False	False	False	False	3	False	False	False	No
2519	711	hkcpc86	8	0	0	0	9	0	0	0	0	0	17	0	0	0	0	2.75	2528.88	1	1	0	False	False	False	False	False	0	False	False	False	No
3777	712	scales1987	43	0	0	0	40	0	0	0	0	0	83	0	0	0	0	2.99536	4287.28	1	0	0	False	False	False	False	False	3	False	False	False	No
180	713	dewu9ifr	8	0.125	1	0	7	0	0.142857	0.142857	1	0	15	2	0.0666667	0.133333	0	0	6	1	4	8.01442e-08	False	False	False	False	False	4	False	False	False	Yes
1246	714	a25288879	22	0	0	0	22	0	0	0	0	0	44	0	0	0	0	2.92821	3508.75	1	0	0	False	False	False	False	False	3	False	False	False	No
2520	715	hks08194475	10	0	0	0	11	0	0	0	0	0	21	0	0	0	0	2.25163	2146.17	1	0	0	False	False	False	False	False	3	False	False	False	No
3778	716	sce88236	12	0	0	0	6	0	0	0	0	0	18	0	0	0	0	2.40401	12882.9	1	0	0	False	False	False	False	False	3	False	False	False	No
181	717	dewu9oghr	146	0	0	0	12	0	0	0	0	0	158	0	0	0	0	0.606798	19.5054	3	194.815	0.00021326	True	True	False	False	False	4	False	False	False	Yes
1247	718	a25589958a	83	0	0	0	108	0	0.0185185	0.0185185	0	2	191	2	0	0.0104712	2	2.88551	7454.11	1	0	0	False	False	False	False	False	3	False	False	False	No
2521	719	hks5437	25	0	0	0	28	0	0.0357143	0.0357143	0	1	53	1	0	0.0188679	1	2.82878	2968.64	1	1	0	False	False	False	False	False	0	False	False	False	No
3779	720	sch58888	128	0	0	0	129	0	0	0	0	0	257	0	0	0	0	3.04256	5496.43	1	0	0	False	False	False	False	False	3	False	False	False	No
182	721	dewuifr	14	0.928571	13	0	0	0	0	0	0	0	14	13	0.928571	0.928571	0	0	3	1	1	0	False	False	False	False	False	0	False	False	False	Yes
1248	722	a26048103	11	0.363636	0	4	9	0	0	0	0	0	20	4	0.2	0.2	4	2.25163	712	2	0	0.00322955	True	False	False	False	False	3	False	False	False	No
2522	723	hkw2000	12	0	0	0	7	0	0	0	0	0	19	0	0	0	0	1.92193	1505.8	1	0	0	False	False	False	False	False	3	False	False	False	No
3780	724	schimandlebyy	23	0.695652	0	16	119	0	0.689076	0.689076	0	82	142	98	0.112676	0.690141	98	0	19.4286	2	0	0.000264486	True	False	False	False	False	4	False	False	False	No
183	725	df234sdfsd	8	0	0	0	0	0	0	0	0	0	8	0	0	0	0	0	8.42857	2	14.3454	3.14967e-06	True	False	False	False	False	3	False	False	False	Yes
1249	726	a2657961	1	0	0	0	5	0	0	0	0	0	6	0	0	0	0	0	11	1	0	0	False	False	False	False	False	3	False	False	False	No
2523	727	hle51228	29	0	0	0	30	0	0	0	0	0	59	0	0	0	0	3.11546	2223.85	1	0	0	False	False	False	False	False	3	False	False	False	No
3781	728	schjeffy	7	0	0	0	1	0	0	0	0	0	8	0	0	0	0	0.918296	7127	1	0	0	False	False	False	False	False	3	False	False	False	No
184	729	df23sfsf	5	1	5	0	0	0	0	0	0	0	5	5	1	1	0	0	0	0	0	0	False	False	False	False	False	0	False	False	False	Yes
1250	730	a26845744	22	0	0	0	23	0	0	0	0	0	45	0	0	0	0	2.39428	1615.58	1	0	0	False	False	False	False	False	3	False	False	False	No
2524	731	hling639131	251	0.243028	60	1	273	0	0.25641	0.25641	69	1	524	131	0.116412	0.25	2	2.92477	1672.81	1	0	0	False	False	False	False	False	3	False	False	False	No
3782	732	scorpion2012	468	0.0705128	33	0	684	0	0.0614035	0.0614035	42	0	1152	75	0.0286458	0.0651042	0	1.45215	68.1421	1	0	0	False	False	False	False	False	3	False	False	False	No
185	733	df2sdfsd	2	0	0	0	0	0	0	0	0	0	2	0	0	0	0	1	148	1	4	8.01442e-08	False	False	False	False	False	3	False	False	False	Yes
1251	734	a26852963	1	0	0	0	3	0	0	0	0	0	4	0	0	0	0	0	128	1	1	0	False	False	False	False	False	0	False	False	False	No
2525	735	hmc1943	11	0	0	0	12	0	0	0	0	0	23	0	0	0	0	2.05881	2303.89	1	0	0	False	False	False	False	False	3	False	False	False	No
3783	736	scott0508	36	0	0	0	48	0	0	0	0	0	84	0	0	0	0	2.94971	4288	1	0	0	False	False	False	False	False	3	False	False	False	No
186	737	df34	3	0	0	0	0	0	0	0	0	0	3	0	0	0	0	0	27	1	4	8.01442e-08	False	False	False	False	False	3	False	False	False	Yes
1252	738	a27853695	3	0	0	0	6	0	0	0	0	0	9	0	0	0	0	1.58496	2382.33	1	0	0	False	False	False	False	False	3	False	False	False	No
2526	739	hmh15871222	7	0	0	0	8	0	0	0	0	0	15	0	0	0	0	2.23593	3419.71	1	0	0	False	False	False	False	False	3	False	False	False	No
3784	740	scotty0621	38	0	0	0	43	0	0	0	0	0	81	0	0	0	0	2.35846	908.375	1	0	0	False	False	False	False	False	3	False	False	False	No
187	741	df34534df	1	0	0	0	0	0	0	0	0	0	1	0	0	0	0	0	1	1	1	0	False	False	False	False	False	0	False	False	False	Yes
1253	742	a29012171	7	0	0	0	8	0	0	0	0	0	15	0	0	0	0	2	9514	2	0	0.001348	True	False	False	False	False	3	False	False	False	No
2527	743	ho_cindy83	2	0	0	0	5	0	0	0	0	0	7	0	0	0	0	0	2000.5	1	0	0	False	False	False	False	False	3	False	False	False	No
3785	744	sd23dfssdf	2	0	0	0	2	0	0	0	0	0	4	0	0	0	0	0	6.5	1	0	0	False	False	False	False	False	3	False	False	False	No
188	745	df3454543	2	0	0	0	0	0	0	0	0	0	2	0	0	0	0	0	6	1	0	0	False	False	False	False	False	0	False	False	False	Yes
1254	746	a29089708	12	0	0	0	11	0	0	0	0	0	23	0	0	0	0	2.72193	7028.2	1	0	0.00022793	False	False	False	False	False	3	False	False	False	No
2528	747	homefeather	130	0.107692	7	7	117	0	0.128205	0.128205	8	7	247	29	0.0566802	0.117409	14	2.86957	983.576	1	0	0	False	False	False	False	False	3	False	False	False	No
3787	748	sdf23sdfdsd	2	0	0	0	3	0	0	0	0	0	5	0	0	0	0	0	11	1	0	0	False	False	False	False	False	3	False	False	False	No
189	749	df34dfgd	1	0	0	0	0	0	0	0	0	0	1	0	0	0	0	0	34	1	1	0	False	False	False	False	False	0	False	False	False	Yes
1255	750	a29747747	1	0	0	0	13	0	0.0769231	0.0769231	0	1	14	1	0	0.0714286	1	0	81	2	0	5.90188e-05	True	False	False	False	False	3	False	False	False	No
2529	751	hong00	1	0	0	0	1	0	0	0	0	0	2	0	0	0	0	0	16	1	0	0	False	False	False	False	False	3	False	False	False	No
3788	752	sdf34343d	1	0	0	0	33	0	0	0	0	0	34	0	0	0	0	0	82	3	0	8.35111e-07	True	True	False	False	False	4	False	False	False	No
190	753	df34dfgdf	2	0	0	0	0	0	0	0	0	0	2	0	0	0	0	0	16	1	3	1.60288e-07	False	False	False	False	False	3	False	False	False	Yes
1256	754	a30151584	1	0	0	0	5	0	0	0	0	0	6	0	0	0	0	0	27585	2	0	7.12393e-08	True	False	False	False	False	4	False	False	False	No
2530	755	hook0930	3	0.333333	0	1	2	0	0.5	0.5	0	1	5	2	0.2	0.4	2	0	1391	1	0	0	False	False	False	False	False	3	False	False	False	No
3789	756	sdf345	6	0	0	0	31	0	0	0	0	0	37	0	0	0	0	0	19.6667	4	0	0.00050517	True	True	True	False	False	4	False	False	False	No
191	757	df34dfgdfdf	2	0	0	0	0	0	0	0	0	0	2	0	0	0	0	0	27.5	1	4	8.01442e-08	False	False	False	False	False	3	False	False	False	Yes
1257	758	a302078	663	0.761689	10	495	681	0	0.765051	0.765051	10	511	1344	1026	0.375744	0.763393	1006	3.22378	2512.74	1	1	0	False	False	False	False	False	0	False	False	False	No
2531	759	hopoty	27	0	0	0	28	0	0	0	0	0	55	0	0	0	0	2.19716	731.111	1	1	0	False	False	False	False	False	0	False	False	False	No
3790	760	sdfsdfsf234	145	0	0	0	12	0	0	0	0	0	157	0	0	0	0	0.602241	20.6632	1	0	0	False	False	False	False	False	3	False	False	False	No
192	761	df34dfgfd	1	0	0	0	0	0	0	0	0	0	1	0	0	0	0	0	24	1	1	0	False	False	False	False	False	0	False	False	False	Yes
1258	762	a3025935	2	0	0	0	1	0	0	0	0	0	3	0	0	0	0	0	14	1	0	0	False	False	False	False	False	3	False	False	False	No
2532	763	hot373839	1	0	0	0	3	0	0	0	0	0	4	0	0	0	0	0	6	1	3	1.60288e-07	False	False	False	False	False	3	False	False	False	No
3791	764	sdfsfwerdfwer	192	0	0	0	49	0	0	0	0	0	241	0	0	0	0	0.554146	22.2366	1	0	0	False	False	False	False	False	3	False	False	False	No
193	765	df34sdfgs	2	0	0	0	0	0	0	0	0	0	2	0	0	0	0	0	1	2	0	2.67147e-08	True	False	False	False	False	3	False	False	False	Yes
1259	766	a3102496tw	54	0.0185185	0	1	58	0	0.0172414	0.0172414	0	1	112	2	0.00892857	0.0178571	2	2.80592	2339.9	1	0	0	False	False	False	False	False	3	False	False	False	No
2533	767	hot78915love	5	0	0	0	5	0	0	0	0	0	10	0	0	0	0	1.37095	288	1	0	0	False	False	False	False	False	3	False	False	False	No
3792	768	sdgdkjnggg	412	0	0	0	11	0	0	0	0	0	423	0	0	0	0	0.566717	18.6264	1	0	0	False	False	False	False	False	3	False	False	False	No
194	769	df4454	8	1	8	0	0	0	0	0	0	0	8	8	1	1	0	0	0	0	0	0	False	False	False	False	False	0	False	False	False	Yes
1260	770	a3217500	4	0.75	0	3	40	0	0.325	0.325	0	13	44	16	0.0681818	0.363636	16	0	34	2	0	0.000542006	True	False	False	False	False	4	False	False	False	No
2534	771	hotdog5978	28	0	0	0	26	0	0	0	0	0	54	0	0	0	0	2.71533	1054.16	1	0	0	False	False	False	False	False	3	False	False	False	No
3796	772	sdhfsda7fads8	6	0	0	0	41	0	0	0	0	0	47	0	0	0	0	1.45915	145.667	3	0	8.35111e-07	True	True	False	False	False	4	False	False	False	No
195	773	df454353	1	0	0	0	0	0	0	0	0	0	1	0	0	0	0	0	31	1	1	0	False	False	False	False	False	0	False	False	False	Yes
1261	774	a3277872	4	0	0	0	7	0	0	0	0	0	11	0	0	0	0	1.58496	11113.7	1	0	0	False	False	False	False	False	3	False	False	False	No
2535	775	hou505	2	0	0	0	2	0	0	0	0	0	4	0	0	0	0	1	1709	1	0	0	False	False	False	False	False	3	False	False	False	No
3797	776	sdhungnov10	48	0.125	0	6	53	0	0.0943396	0.0943396	0	5	101	11	0.0594059	0.108911	11	2.78993	892.5	1	0	0	False	False	False	False	False	3	False	False	False	No
196	777	df4545ff	1	0	0	0	12	0	0	0	0	0	13	0	0	0	0	0	14	3	1	0.000168116	True	True	False	False	False	4	False	False	False	Yes
1262	778	a33223312	70	0	0	0	70	0	0	0	0	0	140	0	0	0	0	3.01969	8163.18	1	0	0	False	False	False	False	False	3	False	False	False	No
2536	779	houngda	6	0	0	0	4	0	0	0	0	0	10	0	0	0	0	1.92193	743.8	1	0	0	False	False	False	False	False	3	False	False	False	No
3798	780	sdil	293	0	0	0	295	0	0	0	0	0	588	0	0	0	0	3.28367	3216.46	1	0	0	False	False	False	False	False	3	False	False	False	No
197	781	df45645df	3	0	0	0	3	0	0	0	0	0	6	0	0	0	0	0	14.6667	2	5.2	4.52815e-06	True	False	False	False	False	3	False	False	False	Yes
1263	782	a3358881	26	0.0384615	0	1	32	0	0	0	0	0	58	1	0.0172414	0.0172414	1	2.79465	4997.94	1	4	8.01442e-08	False	False	False	False	False	3	False	False	False	No
2537	783	howard3449	192	0.015625	3	0	193	0	0.015544	0.015544	3	0	385	6	0.00779221	0.0155844	0	3.3667	5315.08	2	0	2.27966e-05	True	False	False	False	False	4	False	False	False	No
3799	784	sdke7903	2	0.5	0	1	4	0	0.25	0.25	0	1	6	2	0.166667	0.333333	2	0	31	1	0	0	False	False	False	False	False	3	False	False	False	No
198	785	df546546	17	0.470588	8	0	0	0	0	0	0	0	17	8	0.470588	0.470588	0	0	1	1	0	2.26007e-05	False	False	False	False	False	3	False	False	False	Yes
1264	786	a33782000	268	0.145522	10	29	284	0	0.144366	0.144366	12	29	552	80	0.0706522	0.144928	58	3.14558	1659.66	1	0	0	False	False	False	False	False	3	False	False	False	No
2538	787	howard37	1	0	0	0	2	0	0	0	0	0	3	0	0	0	0	0	1075	1	0	0	False	False	False	False	False	3	False	False	False	No
3800	788	sdriftwu	143	0.00699301	1	0	129	0	0.00775194	0.00775194	1	0	272	2	0.00367647	0.00735294	0	3.19364	2855.82	1	0	0	False	False	False	False	False	3	False	False	False	No
199	789	df6eu435	8	1	8	0	0	0	0	0	0	0	8	8	1	1	0	0	0	0	0	0	False	False	False	False	False	0	False	False	False	Yes
1265	790	a356004	77	0.025974	2	0	76	0	0.0394737	0.0394737	3	0	153	5	0.0130719	0.0326797	0	3.29363	3944.21	1	0	0	False	False	False	False	False	3	False	False	False	No
2539	791	howard55220	2	0	0	0	2	0	0	0	0	0	4	0	0	0	0	0	7108	1	0	0	False	False	False	False	False	3	False	False	False	No
3801	792	se7663	16	0	0	0	13	0	0	0	0	0	29	0	0	0	0	1.58496	6959	1	0	0	False	False	False	False	False	3	False	False	False	No
200	793	dfdfg4324	4	0.75	0	3	3	0	0.666667	0.666667	0	2	7	5	0.428571	0.714286	5	0	10	1	1	0	False	False	False	False	False	3	False	False	False	Yes
1266	794	a36288530	1	0	0	0	2	0	0	0	0	0	3	0	0	0	0	0	224	1	0	0	False	False	False	False	False	3	False	False	False	No
2540	795	howardlee7	3	0	0	0	3	0	0	0	0	0	6	0	0	0	0	1	546.5	1	0	0	False	False	False	False	False	3	False	False	False	No
3802	796	sea360cc	26	0.115385	0	3	24	0	0.125	0.125	0	3	50	6	0.06	0.12	6	2.7744	2957.67	1	0	0	False	False	False	False	False	3	False	False	False	No
201	797	dfdfg45	10	0.6	6	0	12	0	0.75	0.75	9	0	22	15	0.272727	0.681818	0	0.811278	79.5	1	8	4.80865e-07	False	False	False	False	False	3	False	False	False	Yes
1267	798	a374j2888	9	0	0	0	6	0	0	0	0	0	15	0	0	0	0	0	6.66667	1	0	0	False	False	False	False	False	3	False	False	False	No
2541	799	hower60503	14	0	0	0	24	0	0	0	0	0	38	0	0	0	0	0.721928	32.6	3	0	5.68189e-05	True	True	False	False	False	4	False	False	False	No
3803	800	sean60274	7	0	0	0	4	0	0	0	0	0	11	0	0	0	0	1.79248	455.333	1	0	0	False	False	False	False	False	3	False	False	False	No
202	801	dfdgfdg	9	0.111111	1	0	21	0	0.238095	0.238095	0	5	30	6	0.0333333	0.2	5	0	21.5	1	0	1.52274e-06	False	False	False	False	False	3	False	False	False	Yes
1268	802	a3751433	4	0.25	0	1	43	0	0.27907	0.27907	0	12	47	13	0.0212766	0.276596	13	0.918296	39	2	0	7.21298e-07	True	False	False	False	False	4	False	False	False	No
2542	803	howhow801122	96	0.0208333	1	1	100	0	0.03	0.03	1	2	196	5	0.0102041	0.0255102	3	3.22273	6999.56	1	1	0	False	False	False	False	False	0	False	False	False	No
3805	804	secondhand110	46	0.391304	7	11	55	0	0.418182	0.418182	10	13	101	41	0.178218	0.405941	24	2.43899	346.296	1	0	0	False	False	False	False	False	3	False	False	False	No
203	805	dfg3453df	1	0	0	0	0	0	0	0	0	0	1	0	0	0	0	0	3	1	1	0	False	False	False	False	False	0	False	False	False	Yes
1269	806	a3758105	12	0	0	0	13	0	0	0	0	0	25	0	0	0	0	2.52206	6806	1	0	0	False	False	False	False	False	3	False	False	False	No
2543	807	howieip	5	0	0	0	6	0	0	0	0	0	11	0	0	0	0	2	908.5	1	0	0	False	False	False	False	False	3	False	False	False	No
3806	808	secret_tin	2	0	0	0	2	0	0	0	0	0	4	0	0	0	0	1	467.5	1	0	0	False	False	False	False	False	3	False	False	False	No
204	809	dfg5435	1	1	1	0	4	0	1	1	4	0	5	5	0.2	1	0	0	0	0	0	0	False	False	False	False	False	0	False	False	False	Yes
1270	810	a39406018	12	0	0	0	12	0	0	0	0	0	24	0	0	0	0	2.52193	1233.6	1	0	0	False	False	False	False	False	3	False	False	False	No
2544	811	howient5	109	0	0	0	109	0	0	0	0	0	218	0	0	0	0	3.26838	4107.13	1	1	0	False	False	False	False	False	0	False	False	False	No
3807	812	secure	192	0.0260417	5	0	199	0	0.0251256	0.0251256	5	0	391	10	0.0127877	0.0255754	0	3.15189	2594.44	1	0	0	False	False	False	False	False	3	False	False	False	No
205	813	dfgaa	2	1	0	2	0	0	0	0	0	0	2	2	1	1	2	0	0	0	0	0	False	False	False	False	False	0	False	False	False	Yes
1271	814	a3973220	3	0	0	0	4	0	0	0	0	0	7	0	0	0	0	1.58496	3693	1	0	0	False	False	False	False	False	3	False	False	False	No
2545	815	hpg653	7	0	0	0	8	0	0	0	0	0	15	0	0	0	0	1.9183	1821.33	1	1	0	False	False	False	False	False	0	False	False	False	No
3808	816	seekiss14	6	0	0	0	7	0	0	0	0	0	13	0	0	0	0	1.79248	2572.5	1	0	0	False	False	False	False	False	3	False	False	False	No
206	817	dfgfdgd43	4	1	1	3	2	0	1	1	0	2	6	6	0.666667	1	5	0	0	0	0	0	False	False	False	False	False	0	False	False	False	Yes
1272	818	a40725203	1	0	0	0	2	0	0	0	0	0	3	0	0	0	0	0	24	1	0	0	False	False	False	False	False	3	False	False	False	No
2547	819	hs3824ci	1298	0.112481	146	0	1420	0	0.111972	0.111972	159	0	2718	305	0.053716	0.112215	0	2.34561	198.79	1	0	0	False	False	False	False	False	3	False	False	False	No
3809	820	selenna888	23	0	0	0	27	0	0	0	0	0	50	0	0	0	0	2.18872	1550.08	1	0	0	False	False	False	False	False	3	False	False	False	No
207	821	dfgptyt	2	0	0	0	0	0	0	0	0	0	2	0	0	0	0	1	56.5	1	4	8.01442e-08	False	False	False	False	False	3	False	False	False	Yes
1273	822	a408252002	1346	0.0713224	96	0	1409	0	0.0745209	0.0745209	105	0	2755	201	0.0348457	0.0729583	0	1.92442	112.186	7	24.5977	1.79344e-06	True	True	True	True	True	4	False	False	False	No
2548	823	hsinglechen	61	0	0	0	66	0	0	0	0	0	127	0	0	0	0	2.98378	1404.05	1	0	0	False	False	False	False	False	3	False	False	False	No
3810	824	sell_man	1208	0.089404	106	2	1496	0	0.0975936	0.0975936	144	2	2704	254	0.0399408	0.0939349	4	2.64533	660.451	1	0	0	False	False	False	False	False	3	False	False	False	No
208	825	dfh3454	11	0	0	0	1	0	0	0	0	0	12	0	0	0	0	0	12.9	3	0	0.000660413	True	True	False	False	False	4	False	False	False	Yes
1274	826	a41500512	8	0	0	0	5	0	0.2	0.2	0	1	13	1	0	0.0769231	1	1.55666	2624.29	1	0	0	False	False	False	False	False	3	False	False	False	No
2549	827	hsini	60	0.0333333	1	1	64	0	0.046875	0.046875	2	1	124	5	0.016129	0.0403226	2	3.06086	4282.52	1	0	0	False	False	False	False	False	3	False	False	False	No
3811	828	sens816	13	0	0	0	54	0	0.148148	0.148148	0	8	67	8	0	0.119403	8	0.391244	23.8462	3	0	0.000617816	True	True	False	False	False	4	False	False	False	No
209	829	dfhdfhdffdjbnvn	7	0	0	0	0	0	0	0	0	0	7	0	0	0	0	0.650022	24.6667	2	12.0909	0.00220742	True	False	False	False	False	3	False	False	False	Yes
1275	830	a4354551	124	0.0403226	0	5	139	0	0.0359712	0.0359712	0	5	263	10	0.0190114	0.0380228	10	3.14064	6352.98	1	0	0	False	False	False	False	False	3	False	False	False	No
2550	831	hsiung1005	15	0.266667	0	4	15	0	0.2	0.2	0	3	30	7	0.133333	0.233333	7	2.66353	4861.18	1	0	0	False	False	False	False	False	3	False	False	False	No
3812	832	sent7001	74	0	0	0	59	0	0	0	0	0	133	0	0	0	0	2.93771	1118.9	1	0	0	False	False	False	False	False	3	False	False	False	No
210	833	dfhdfj	1	0	0	0	0	0	0	0	0	0	1	0	0	0	0	0	156	1	1	0	False	False	False	False	False	0	False	False	False	Yes
1276	834	a4656292a	2	0	0	0	1	0	0	0	0	0	3	0	0	0	0	1	2342.5	1	0	0	False	False	False	False	False	3	False	False	False	No
2551	835	hsjc63922	57	0.0526316	2	1	60	0	0.0666667	0.0666667	3	1	117	7	0.025641	0.0598291	2	3.09697	2124.95	1	0	0	False	False	False	False	False	3	False	False	False	No
3813	836	set952	38	0.0789474	0	3	39	0	0.0769231	0.0769231	0	3	77	6	0.038961	0.0779221	6	3.31184	4495.25	1	0	0	False	False	False	False	False	3	False	False	False	No
211	837	dfhdfjk	1	0	0	0	0	0	0	0	0	0	1	0	0	0	0	0	6	1	1	0	False	False	False	False	False	0	False	False	False	Yes
1277	838	a4s5d65k6u6	5	0	0	0	6	0	0	0	0	0	11	0	0	0	0	1.37095	1736.4	1	0	0	False	False	False	False	False	3	False	False	False	No
2552	839	hskuo4654	5	0	0	0	5	0	0	0	0	0	10	0	0	0	0	0.811278	52.75	1	0	0	False	False	False	False	False	3	False	False	False	No
3814	840	sewcheng	10	0	0	0	10	0	0	0	0	0	20	0	0	0	0	2.23593	7652.57	1	0	0	False	False	False	False	False	3	False	False	False	No
212	841	dfhdgjj	27	1	27	0	0	0	0	0	0	0	27	27	1	1	0	0	0	0	0	0	False	False	False	False	False	0	False	False	False	Yes
1278	842	a516239	2	0	0	0	1	0	0	0	0	0	3	0	0	0	0	1	7650.5	1	0	0	False	False	False	False	False	3	False	False	False	No
2553	843	hspss9218	14	0	0	0	12	0	0	0	0	0	26	0	0	0	0	3.03915	3783.43	2	0	0.00236682	True	False	False	False	False	3	False	False	False	No
3815	844	sfd5454	1	0	0	0	8	0	0	0	0	0	9	0	0	0	0	0	26	4	0	1.07228e-06	True	True	True	False	False	4	False	False	False	No
213	845	dfhdsf76ysd	7	0	0	0	8	0	0	0	0	0	15	0	0	0	0	0	8.66667	1	6	2.40433e-07	False	False	False	False	False	3	False	False	False	Yes
1279	846	a5170111	74	0	0	0	22	0	0	0	0	0	96	0	0	0	0	3.17362	2116.4	1	1	0	False	False	False	False	False	0	False	False	False	No
2554	847	hssh66	61	0	0	0	54	0	0	0	0	0	115	0	0	0	0	2.92736	2320.94	1	0	0	False	False	False	False	False	3	False	False	False	No
3816	848	sfh87	2	0	0	0	3	0	0	0	0	0	5	0	0	0	0	0	11	1	0	0	False	False	False	False	False	3	False	False	False	No
214	849	dfhfdfdfjh	17	0	0	0	1	0	0	0	0	0	18	0	0	0	0	0.371232	23.8571	1	27.2772	0.000510519	False	False	False	False	False	3	False	False	False	Yes
1280	850	a5252476	122	0.0163934	0	2	126	0	0.015873	0.015873	0	2	248	4	0.00806452	0.016129	4	3.15545	4701.99	1	0	0	False	False	False	False	False	3	False	False	False	No
2555	851	hsu76350158	7	0	0	0	8	0	0	0	0	0	15	0	0	0	0	1.6645	9574.86	1	0	0	False	False	False	False	False	3	False	False	False	No
3817	852	sfkjsngg	40	0.025	0	1	13	0	0.0769231	0.0769231	0	1	53	2	0.0188679	0.0377358	2	1.03182	37.3824	1	0	0	False	False	False	False	False	3	False	False	False	No
215	853	dfhfgjgkjk	1	0	0	0	0	0	0	0	0	0	1	0	0	0	0	0	14	1	1	0	False	False	False	False	False	0	False	False	False	Yes
1281	854	a556611013	23	0.0434783	0	1	26	0	0.0384615	0.0384615	0	1	49	2	0.0204082	0.0408163	2	2.94145	3980.25	1	0	0	False	False	False	False	False	3	False	False	False	No
2556	855	hsuan0330	1	0	0	0	2	0	0	0	0	0	3	0	0	0	0	0	8164	1	0	0	False	False	False	False	False	3	False	False	False	No
3818	856	sh19686522	1	0	0	0	2	0	0	0	0	0	3	0	0	0	0	0	307	1	0	0	False	False	False	False	False	3	False	False	False	No
216	857	dfhjdfjj	8	0	0	0	2	0	0	0	0	0	10	0	0	0	0	0.811278	155	2	6.85714	2.52721e-06	True	False	False	False	False	4	False	False	False	Yes
1282	858	a55669970	7	0	0	0	2	0	0	0	0	0	9	0	0	0	0	1.5	6744.25	1	0	0	False	False	False	False	False	3	False	False	False	No
2557	859	hsujameson	130	0.146154	1	18	136	0	0.139706	0.139706	1	18	266	38	0.0714286	0.142857	36	3.09311	1528.93	1	1	0	False	False	False	False	False	0	False	False	False	No
3819	860	sh314025	3	0.666667	0	2	4	0	0.75	0.75	0	3	7	5	0.285714	0.714286	5	0	4	1	0	0	False	False	False	False	False	3	False	False	False	No
217	861	dfhjp34	11	0	0	0	10	0	0	0	0	0	21	0	0	0	0	0.650022	27	3	0	3.67423e-06	True	True	False	False	False	6	True	True	False	Yes
1283	862	a560729	326	0.0337423	10	1	333	0	0.033033	0.033033	10	1	659	22	0.016692	0.0333839	2	3.23464	2503.36	1	0	0	False	False	False	False	False	3	False	False	False	No
2558	863	ht021944	8858	0.12294	1089	0	13064	0	0.11237	0.11237	1468	0	21922	2557	0.0496761	0.116641	0	1.97967	132.853	1	0	0	False	False	False	False	False	3	False	False	False	No
3820	864	shan8325shan8325	77	0	0	0	79	0	0	0	0	0	156	0	0	0	0	3.02799	3786.9	1	1	0	False	False	False	False	False	0	False	False	False	No
218	865	dfhrtjkh	4	0	0	0	3	0	0	0	0	0	7	0	0	0	0	1.5	56.25	1	8	4.80865e-07	False	False	False	False	False	3	False	False	False	Yes
1284	866	a5636477	12	0	0	0	16	0	0	0	0	0	28	0	0	0	0	0.811278	33.5	3	0	5.10026e-05	True	True	False	False	False	4	False	False	False	No
2559	867	htegtt866	232	0.991379	162	68	261	0	0.984674	0.984674	189	68	493	487	0.466531	0.98783	136	1	247.5	1	3	1.60288e-07	False	False	False	False	False	3	False	False	False	No
3821	868	shands	41	0.0243902	0	1	33	0	0	0	0	0	74	1	0.0135135	0.0135135	1	2.98666	11064.1	1	0	0	False	False	False	False	False	3	False	False	False	No
219	869	dfhtjkkh	19	0.368421	7	0	0	0	0	0	0	0	19	7	0.368421	0.368421	0	0.721928	95	1	10	8.01442e-07	False	False	False	False	False	3	False	False	False	Yes
1285	870	a5650057	1	0	0	0	3	0	0	0	0	0	4	0	0	0	0	0	460	2	0	7.12393e-08	True	False	False	False	False	4	False	False	False	No
2560	871	htill	9	0	0	0	6	0	0	0	0	0	15	0	0	0	0	2.19716	2255	1	0	0	False	False	False	False	False	3	False	False	False	No
3822	872	shanechu	18	0.111111	0	2	16	0	0	0	0	0	34	2	0.0588235	0.0588235	2	2.35275	4383.36	1	0	0	False	False	False	False	False	3	False	False	False	No
220	873	dfhtjykl	1	0	0	0	0	0	0	0	0	0	1	0	0	0	0	0	97	1	1	0	False	False	False	False	False	0	False	False	False	Yes
1287	874	a614570	1	0	0	0	6	0	0.333333	0.333333	0	2	7	2	0	0.285714	2	0	33303	1	0	0	False	False	False	False	False	3	False	False	False	No
2561	875	htmicxjbl362	7	0	0	0	3	0	0	0	0	0	10	0	0	0	0	0	7.42857	1	0	0	False	False	False	False	False	3	False	False	False	No
3823	876	shaohua73	6	0.166667	0	1	1	0	0	0	0	0	7	1	0.142857	0.142857	1	1.92193	9488	1	0	0	False	False	False	False	False	3	False	False	False	No
221	877	dfiuds9fds	4	1	0	4	0	0	0	0	0	0	4	4	1	1	4	0	0	0	0	0	False	False	False	False	False	0	False	False	False	Yes
1288	878	a623ami	19	0	0	0	19	0	0	0	0	0	38	0	0	0	0	2.87314	3064.85	1	0	0	False	False	False	False	False	3	False	False	False	No
2562	879	htrjurjk	1	0	0	0	30	0	0	0	0	0	31	0	0	0	0	0	82	3	0	8.35111e-07	True	True	False	False	False	4	False	False	False	No
3824	880	sharybox	82	0.0853659	2	5	83	0	0.0843373	0.0843373	2	5	165	14	0.0424242	0.0848485	10	2.99151	2798.27	1	0	0	False	False	False	False	False	3	False	False	False	No
222	881	dfjdf89dsf	4	0	0	0	0	0	0	0	0	0	4	0	0	0	0	0	5	1	0	0	False	False	False	False	False	3	False	False	False	Yes
1289	882	a6416000	8	0	0	0	11	0	0	0	0	0	19	0	0	0	0	2.25163	4087.83	1	0	0	False	False	False	False	False	3	False	False	False	No
2563	883	hu7921	18	0	0	0	15	0	0	0	0	0	33	0	0	0	0	2.84237	10077.5	1	0	0	False	False	False	False	False	3	False	False	False	No
3825	884	shawn087871	3	0	0	0	2	0	0	0	0	0	5	0	0	0	0	1.58496	1995	1	0	0	False	False	False	False	False	3	False	False	False	No
223	885	dfjdsf87dsf	1	0	0	0	0	0	0	0	0	0	1	0	0	0	0	0	8	1	1	0	False	False	False	False	False	0	False	False	False	Yes
1290	886	a65233256	4	0	0	0	4	0	0.75	0.75	0	3	8	3	0	0.375	3	2	570.25	1	0	0	False	False	False	False	False	3	False	False	False	No
2564	887	huah911	4	0.25	0	1	22	0	0.363636	0.363636	0	8	26	9	0.0384615	0.346154	9	1	1626	1	0	0	False	False	False	False	False	3	False	False	False	No
3826	888	she12488	28	0	0	0	12	0	0	0	0	0	40	0	0	0	0	2.68925	3027.27	1	0	0	False	False	False	False	False	3	False	False	False	No
224	889	dfjhd87w	4	0	0	0	0	0	0	0	0	0	4	0	0	0	0	0	1	1	2	9.6173e-07	False	False	False	False	False	0	False	False	False	Yes
1291	890	a6655ba	57	0.22807	1	12	61	0	0.229508	0.229508	2	12	118	27	0.110169	0.228814	24	2.93936	1492.74	1	0	0	False	False	False	False	False	3	False	False	False	No
2566	891	huasex	1	0	0	0	1	0	0	0	0	0	2	0	0	0	0	0	24	1	0	0	False	False	False	False	False	3	False	False	False	No
3827	892	sheng06	30	0	0	0	31	0	0	0	0	0	61	0	0	0	0	2.7899	2277.8	1	0	0	False	False	False	False	False	3	False	False	False	No
225	893	dfkj98dsf	3	0.666667	0	2	2	0	1	1	0	2	5	4	0.4	0.8	4	0	11	1	1	0	False	False	False	False	False	0	False	False	False	Yes
1292	894	a6666153	20	0	0	0	18	0	0	0	0	0	38	0	0	0	0	2.28778	1563.15	1	0	0	False	False	False	False	False	3	False	False	False	No
2567	895	hugo19750904	1	0	0	0	2	0	0	0	0	0	3	0	0	0	0	0	1502	1	0	0	False	False	False	False	False	3	False	False	False	No
3828	896	sheng1113	9	0	0	0	9	0	0	0	0	0	18	0	0	0	0	2.23593	1660	1	1	0	False	False	False	False	False	0	False	False	False	No
226	897	dfkjds87fu	10	0	0	0	0	0	0	0	0	0	10	0	0	0	0	0	10.6	2	16.3604	0.00042739	True	False	False	False	False	0	False	False	False	Yes
1293	898	a66694202	5	0.2	0	1	7	0	0.142857	0.142857	0	1	12	2	0.0833333	0.166667	2	2	7433.5	1	0	0	False	False	False	False	False	3	False	False	False	No
2568	899	humor1016	3	0	0	0	2	0	0	0	0	0	5	0	0	0	0	0	7744	1	0	0	False	False	False	False	False	3	False	False	False	No
3829	900	shenyupei	45	0	0	0	43	0	0	0	0	0	88	0	0	0	0	2.93874	1018.67	1	0	0	False	False	False	False	False	3	False	False	False	No
227	901	dfpi43	5	1	5	0	0	0	0	0	0	0	5	5	1	1	0	0	0	0	0	0	False	False	False	False	False	0	False	False	False	Yes
1294	902	a6891	4	0	0	0	8	0	0	0	0	0	12	0	0	0	0	0	4830	1	0	0	False	False	False	False	False	3	False	False	False	No
2569	903	huthutblur	8	0	0	0	7	0	0	0	0	0	15	0	0	0	0	2.23593	4029.86	1	1	0	False	False	False	False	False	0	False	False	False	No
3830	904	shes1237	3	0	0	0	2	0	0.5	0.5	0	1	5	1	0	0.2	1	1.58496	2722.33	1	0	0	False	False	False	False	False	3	False	False	False	No
228	905	dfshgkll	1	0	0	0	0	0	0	0	0	0	1	0	0	0	0	0	1	1	0	0	False	False	False	False	False	3	False	False	False	Yes
1295	906	a693751744	41	0.0487805	0	2	44	0	0.0454545	0.0454545	0	2	85	4	0.0235294	0.0470588	4	2.93755	6382.61	1	0	0	False	False	False	False	False	3	False	False	False	No
2570	907	hwai_397	37	0.027027	1	0	41	0	0.0487805	0.0487805	2	0	78	3	0.0128205	0.0384615	0	3.13926	3776.29	1	0	0	False	False	False	False	False	3	False	False	False	No
3831	908	shine1982	54	0	0	0	53	0	0	0	0	0	107	0	0	0	0	2.99519	5488.45	1	0	0	False	False	False	False	False	3	False	False	False	No
229	909	dfsjfds9	13	0	0	0	18	0	0	0	0	0	31	0	0	0	0	0	4.85714	4	14	0.000138018	True	True	True	False	False	4	False	False	False	Yes
1296	910	a6a9a3a5a	1	0	0	0	2	0	0	0	0	0	3	0	0	0	0	0	2580	1	0	0	False	False	False	False	False	3	False	False	False	No
2572	911	i20laura	38	0	0	0	41	0	0	0	0	0	79	0	0	0	0	3.01789	7398.79	1	1	0	False	False	False	False	False	0	False	False	False	No
3832	912	shing92559255	26	0.0384615	0	1	28	0	0.0714286	0.0714286	0	2	54	3	0.0185185	0.0555556	3	2.97288	3248.88	1	0	0	False	False	False	False	False	3	False	False	False	No
230	913	dgfaw	5	0	0	0	0	0	0	0	0	0	5	0	0	0	0	0	1	1	4	8.01442e-08	False	False	False	False	False	0	False	False	False	Yes
1297	914	a700723	118	0	0	0	127	0	0	0	0	0	245	0	0	0	0	3.14361	5027.79	1	0	0	False	False	False	False	False	3	False	False	False	No
2573	915	i659211314	2	0	0	0	3	0	0	0	0	0	5	0	0	0	0	1	3917	1	0	0	False	False	False	False	False	3	False	False	False	No
3833	916	shinjian	219	0	0	0	233	0	0	0	0	0	452	0	0	0	0	3.18515	3353.91	1	0	0	False	False	False	False	False	3	False	False	False	No
231	917	dgfgf23	9	1	9	0	0	0	0	0	0	0	9	9	1	1	0	0	0	0	0	0	False	False	False	False	False	0	False	False	False	Yes
1298	918	a7055901	57	0.0175439	0	1	61	0	0	0	0	0	118	1	0.00847458	0.00847458	1	3.09952	11957.4	1	0	0	False	False	False	False	False	3	False	False	False	No
2574	919	i915029	94	0	0	0	101	0	0	0	0	0	195	0	0	0	0	2.6783	496.385	1	0	0	False	False	False	False	False	3	False	False	False	No
3834	920	shinyun19	159	0	0	0	170	0	0	0	0	0	329	0	0	0	0	3.27823	3683.21	1	0	0	False	False	False	False	False	3	False	False	False	No
232	921	dgjkdnkjh	2	0	0	0	0	0	0	0	0	0	2	0	0	0	0	0	24	2	0	2.62535e-06	True	False	False	False	False	4	False	False	False	Yes
1299	922	a7135030	17	0	0	0	9	0	0	0	0	0	26	0	0	0	0	2.87291	6793	2	0	0.000620794	True	False	False	False	False	3	False	False	False	No
2575	923	iamctcgo	13	0.846154	0	11	14	0	0.785714	0.785714	0	11	27	22	0.407407	0.814815	22	1	65	1	0	0	False	False	False	False	False	3	False	False	False	No
3835	924	shiuan348	13	0	0	0	10	0	0	0	0	0	23	0	0	0	0	2.52164	20394.9	1	0	0	False	False	False	False	False	3	False	False	False	No
233	925	dh76sda	2	0	0	0	3	0	0	0	0	0	5	0	0	0	0	0	16	1	0	0	False	False	False	False	False	3	False	False	False	Yes
1300	926	a740777	18	0	0	0	18	0	0	0	0	0	36	0	0	0	0	2.95282	2121.44	1	0	0	False	False	False	False	False	3	False	False	False	No
2576	927	iamsender1	44	0	0	0	47	0	0	0	0	0	91	0	0	0	0	2.96638	4653.76	1	0	0	False	False	False	False	False	3	False	False	False	No
3836	928	shochannn	7	0	0	0	8	0	0	0	0	0	15	0	0	0	0	1.5	9820.5	1	0	0	False	False	False	False	False	3	False	False	False	No
234	929	dhens	70	0	0	0	1	0	0	0	0	0	71	0	0	0	0	0.699843	20.8	1	31	1.06592e-05	False	False	False	False	False	3	False	False	False	Yes
1301	930	a746186	46	0.0217391	0	1	43	0	0.0465116	0.0465116	0	2	89	3	0.011236	0.0337079	3	3.08418	4083.45	1	0	0	False	False	False	False	False	3	False	False	False	No
2577	931	ian89757	1	0	0	0	6	0	0	0	0	0	7	0	0	0	0	0	6165	1	0	0	False	False	False	False	False	3	False	False	False	No
3837	932	sholong	10	0	0	0	6	0	0	0	0	0	16	0	0	0	0	2.15564	1626	1	0	0	False	False	False	False	False	3	False	False	False	No
235	933	dhgkgdkg	7	0.142857	1	0	7	0	0.142857	0.142857	1	0	14	2	0.0714286	0.142857	0	1.37095	100.6	1	10	8.01442e-07	False	False	False	False	False	3	False	False	False	Yes
1302	934	a7682299	14	0	0	0	14	0	0	0	0	0	28	0	0	0	0	2.73216	10300.5	1	0	0	False	False	False	False	False	3	False	False	False	No
2578	935	ibn914	166	0.0120482	2	0	174	0	0.0114943	0.0114943	2	0	340	4	0.00588235	0.0117647	0	3.39693	4695.73	1	0	0	False	False	False	False	False	3	False	False	False	No
3838	936	shopping0425	14	0.214286	0	3	14	0	0.214286	0.214286	0	3	28	6	0.107143	0.214286	6	2.72548	1510	1	0	0	False	False	False	False	False	3	False	False	False	No
236	937	dhrtdhfd	3	1	3	0	8	0	1	1	8	0	11	11	0.272727	1	0	0	0	0	0	0	False	False	False	False	False	0	False	False	False	Yes
1303	938	a771077008	4	0	0	0	2	0	0	0	0	0	6	0	0	0	0	1	7172	1	0	0	False	False	False	False	False	3	False	False	False	No
2579	939	ibyutyvuj	1	0	0	0	2	0	0	0	0	0	3	0	0	0	0	0	5	1	0	0	False	False	False	False	False	3	False	False	False	No
3839	940	shoushlang	49	0	0	0	20	0	0	0	0	0	69	0	0	0	0	3.08469	2114.73	1	0	0	False	False	False	False	False	3	False	False	False	No
237	941	diamondh888	1	0	0	0	2	0	0	0	0	0	3	0	0	0	0	0	37	1	0	0	False	False	False	False	False	3	False	False	False	Yes
1304	942	a77268	145	0	0	0	153	0	0	0	0	0	298	0	0	0	0	3.29641	3309.38	1	0	0	False	False	False	False	False	3	False	False	False	No
2580	943	ice12072003	187	0.106952	20	0	186	0	0.0967742	0.0967742	18	0	373	38	0.0536193	0.101877	0	3.01469	1110.62	1	0	0	False	False	False	False	False	3	False	False	False	No
3840	944	show_942765	4	0.25	0	1	4	0	0.25	0.25	0	1	8	2	0.125	0.25	2	1	6545	1	0	0	False	False	False	False	False	3	False	False	False	No
238	945	disuaf8sdif	3	0	0	0	0	0	0	0	0	0	3	0	0	0	0	0	3	2	0	2.67147e-08	True	False	False	False	False	4	False	False	False	Yes
1305	946	a7765123	18	0	0	0	16	0	0	0	0	0	34	0	0	0	0	2.5	12087.1	1	0	0	False	False	False	False	False	3	False	False	False	No
2581	947	ice6965	32	0	0	0	37	0	0	0	0	0	69	0	0	0	0	3.24389	6784.32	1	0	0	False	False	False	False	False	3	False	False	False	No
3841	948	showboat0807	228	0.0219298	0	5	233	0	0.0257511	0.0257511	0	6	461	11	0.010846	0.0238612	11	3.09622	4370.51	1	0	0	False	False	False	False	False	3	False	False	False	No
239	949	djf87sdy	36	0	0	0	0	0	0	0	0	0	36	0	0	0	0	0.309543	8.63889	1	72	5.04908e-05	False	False	False	False	False	3	False	False	False	Yes
1306	950	a7775634	5	0	0	0	6	0	0	0	0	0	11	0	0	0	0	1.37095	231	1	0	0	False	False	False	False	False	3	False	False	False	No
2582	951	icebabe	114	0.0438596	3	2	122	0	0.0409836	0.0409836	3	2	236	10	0.0211864	0.0423729	4	2.4859	401.485	1	0	0	False	False	False	False	False	3	False	False	False	No
3842	952	showlin0103	40	0.075	3	0	26	0	0.0384615	0.0384615	1	0	66	4	0.0454545	0.0606061	0	2.93988	2166.65	1	0	0	False	False	False	False	False	3	False	False	False	No
240	953	djfdhsajk	24	0.375	9	0	7	0	0.285714	0.285714	2	0	31	11	0.290323	0.354839	0	1.52164	160.857	1	28	7.29312e-06	False	False	False	False	False	3	False	False	False	Yes
1307	954	a7782125	33	0	0	0	5	0	0	0	0	0	38	0	0	0	0	2	4335.25	1	0	0	False	False	False	False	False	3	False	False	False	No
2583	955	ichan030	497	0.0905433	45	0	578	0	0.0899654	0.0899654	52	0	1075	97	0.0418605	0.0902326	0	2.05063	114.046	1	0	0	False	False	False	False	False	3	False	False	False	No
3843	956	showshow213	11	0	0	0	4	0	0	0	0	0	15	0	0	0	0	2.23593	1923.43	1	0	0	False	False	False	False	False	3	False	False	False	No
241	957	djkge8d7	6	0	0	0	0	0	0	0	0	0	6	0	0	0	0	0	14	2	0	1.32505e-06	True	False	False	False	False	4	False	False	False	Yes
1309	958	a791008	8	0	0	0	11	0	0	0	0	0	19	0	0	0	0	2.12809	6205.71	1	0	0	False	False	False	False	False	3	False	False	False	No
2585	959	if8939006	6	0	0	0	2	0	0	0	0	0	8	0	0	0	0	2	650.5	1	0	0	False	False	False	False	False	3	False	False	False	No
3844	960	shs0910tw	59	0.0677966	4	0	57	0	0.105263	0.105263	6	0	116	10	0.0344828	0.0862069	0	2.71131	534.6	1	0	0	False	False	False	False	False	3	False	False	False	No
242	961	djsaf7dstfiosd	6	0	0	0	6	0	0	0	0	0	12	0	0	0	0	0	12.5	1	4	8.01442e-08	False	False	False	False	False	3	False	False	False	Yes
1310	962	a7924p	81	0.0493827	4	0	87	0	0.045977	0.045977	4	0	168	8	0.0238095	0.047619	0	3.05567	1363.06	1	0	0	False	False	False	False	False	3	False	False	False	No
2587	963	iheru	3214	0.537648	549	1179	3338	0	0.522768	0.522768	629	1116	6552	3473	0.263736	0.530067	2295	2.43309	532.794	1	0	0	False	False	False	False	False	3	False	False	False	No
3845	964	shsps923102	6	0.166667	0	1	4	0	0	0	0	0	10	1	0.1	0.1	1	2.32193	1167.2	1	0	0	False	False	False	False	False	3	False	False	False	No
243	965	djsfs8d7fu	4	0	0	0	0	0	0	0	0	0	4	0	0	0	0	0	14.6667	2	0	5.47652e-07	True	False	False	False	False	4	False	False	False	Yes
1311	966	a8368370	2	0	0	0	22	0	0	0	0	0	24	0	0	0	0	0	3322	2	0	5.42309e-07	True	False	False	False	False	4	False	False	False	No
2588	967	iki525	1	0	0	0	1	0	0	0	0	0	2	0	0	0	0	0	1058	1	0	0	False	False	False	False	False	3	False	False	False	No
3846	968	shu4608522	18	0.111111	0	2	18	0	0.111111	0.111111	0	2	36	4	0.0555556	0.111111	4	3.02699	2642.92	1	0	0	False	False	False	False	False	3	False	False	False	No
244	969	dkgdkgh	2	0	0	0	0	0	0	0	0	0	2	0	0	0	0	0	15	1	4	8.01442e-08	False	False	False	False	False	0	False	False	False	Yes
1312	970	a840815	136	0.0294118	2	2	141	0	0.0283688	0.0283688	2	2	277	8	0.0144404	0.0288809	4	3.08173	1103.18	1	0	0	False	False	False	False	False	3	False	False	False	No
2589	971	illusory00	5	0	0	0	6	0	0	0	0	0	11	0	0	0	0	0.918296	360.667	1	0	0	False	False	False	False	False	3	False	False	False	No
3847	972	shuanglin	14	0.142857	0	2	14	0	0.142857	0.142857	0	2	28	4	0.0714286	0.142857	4	2.25163	1615.17	1	0	0	False	False	False	False	False	3	False	False	False	No
245	973	dkjasf98dsf	1	0	0	0	0	0	0	0	0	0	1	0	0	0	0	0	2	1	1	0	False	False	False	False	False	0	False	False	False	Yes
1313	974	a8411212	43	0	0	0	44	0	0	0	0	0	87	0	0	0	0	2.9339	6305.1	1	0	0	False	False	False	False	False	3	False	False	False	No
2590	975	ilmondeo	6	0	0	0	7	0	0	0	0	0	13	0	0	0	0	2	6051.25	1	0	0	False	False	False	False	False	3	False	False	False	No
3848	976	shun920229	49	0	0	0	53	0	0	0	0	0	102	0	0	0	0	2.70138	6049.95	1	0	0	False	False	False	False	False	3	False	False	False	No
246	977	dksf98dsf	21	0.047619	1	0	6	0	0.166667	0.166667	1	0	27	2	0.037037	0.0740741	0	0.391244	13	4	57.0074	0.00134995	True	True	True	False	False	4	False	False	False	Yes
1314	978	a850048	12	0	0	0	16	0	0	0	0	0	28	0	0	0	0	2.80735	3995.43	1	0	0	False	False	False	False	False	3	False	False	False	No
2591	979	ilovezero	284	0.239437	22	46	298	0	0.234899	0.234899	25	45	582	138	0.116838	0.237113	91	2.71913	665.545	1	0	0	False	False	False	False	False	3	False	False	False	No
3849	980	shunlo	31	0.322581	0	10	33	0	0.30303	0.30303	0	10	64	20	0.15625	0.3125	20	2.76596	1088.95	1	0	0	False	False	False	False	False	3	False	False	False	No
247	981	dollyeh	7	0	0	0	0	0	0	0	0	0	7	0	0	0	0	0	6.25	1	7	6.49168e-06	False	False	False	False	False	3	False	False	False	Yes
1315	982	a8520852016	11	0	0	0	11	0	0	0	0	0	22	0	0	0	0	2.15564	6436.12	1	0	0	False	False	False	False	False	3	False	False	False	No
2592	983	imjacky0419	5	0.6	0	3	84	0	0.238095	0.238095	0	20	89	23	0.0337079	0.258427	23	0	1035	2	0	4.59627e-05	True	False	False	False	False	4	False	False	False	No
3850	984	shuper-tw	72	0.125	3	6	73	0	0.136986	0.136986	4	6	145	19	0.062069	0.131034	12	2.89071	1001.14	1	0	0	False	False	False	False	False	3	False	False	False	No
248	985	domart	23	0	0	0	0	0	0	0	0	0	23	0	0	0	0	0	5.69231	1	26	6.25125e-06	False	False	False	False	False	3	False	False	False	Yes
1316	986	a852746	29	0	0	0	30	0	0	0	0	0	59	0	0	0	0	3.16307	2606.96	1	0	0	False	False	False	False	False	3	False	False	False	No
2593	987	imkikitt	86	0	0	0	68	0	0	0	0	0	154	0	0	0	0	3.33112	4872.03	1	0	0	False	False	False	False	False	3	False	False	False	No
3851	988	sikga417	61	0	0	0	62	0	0	0	0	0	123	0	0	0	0	3.23572	4457.33	1	0	0	False	False	False	False	False	3	False	False	False	No
249	989	drtc43	1	0	0	0	0	0	0	0	0	0	1	0	0	0	0	0	67	1	1	0	False	False	False	False	False	0	False	False	False	Yes
1317	990	a85309077	5	0	0	0	5	0	0	0	0	0	10	0	0	0	0	2.32193	5174.2	1	0	0	False	False	False	False	False	3	False	False	False	No
2595	991	imnevermind	2	0	0	0	1	0	0	0	0	0	3	0	0	0	0	1	1588	1	0	0	False	False	False	False	False	3	False	False	False	No
3852	992	silence18	4	0	0	0	6	0	0	0	0	0	10	0	0	0	0	1.58496	754.333	1	0	0	False	False	False	False	False	3	False	False	False	No
250	993	ds769860	8	1	8	0	0	0	0	0	0	0	8	8	1	1	0	0	0	0	0	0	False	False	False	False	False	0	False	False	False	Yes
1318	994	a85823844	2	0	0	0	14	0	0.428571	0.428571	0	6	16	6	0	0.375	6	1	2235	2	0	5.42309e-07	True	False	False	False	False	4	False	False	False	No
2596	995	injazz	109	0.0642202	0	7	91	0	0.0769231	0.0769231	0	7	200	14	0.035	0.07	14	3.24928	3146.28	1	0	0	False	False	False	False	False	3	False	False	False	No
3853	996	silence355	43	0	0	0	44	0	0	0	0	0	87	0	0	0	0	3.05845	1801.97	1	0	0	False	False	False	False	False	3	False	False	False	No
251	997	ds8sdyfhes	24	0.958333	23	0	25	0	0.84	0.84	21	0	49	44	0.469388	0.897959	0	0	25	1	1	0	False	False	False	False	False	0	False	False	False	Yes
1319	998	a8645922a	10	0	0	0	12	0	0.0833333	0.0833333	0	1	22	1	0	0.0454545	1	2.92193	3195.6	1	0	0	False	False	False	False	False	3	False	False	False	No
2597	999	ioiiiui	57	0	0	0	52	0	0	0	0	0	109	0	0	0	0	2.99853	1640.5	1	0	0	False	False	False	False	False	3	False	False	False	No
3854	1000	silverwing	146	0.00684932	0	1	152	0	0.00657895	0.00657895	0	1	298	2	0.0033557	0.00671141	2	3.20728	3532.13	1	0	0	False	False	False	False	False	3	False	False	False	No
252	1001	dsakfsdfa	1	0	0	0	1	0	0	0	0	0	2	0	0	0	0	0	47	1	0	0	False	False	False	False	False	3	False	False	False	Yes
1320	1002	a8662533	3	0	0	0	2	0	0	0	0	0	5	0	0	0	0	1.58496	3649	1	0	0	False	False	False	False	False	3	False	False	False	No
2598	1003	ioio5228	25	0	0	0	26	0	0	0	0	0	51	0	0	0	0	2.23994	7728.55	1	0	0	False	False	False	False	False	3	False	False	False	No
3855	1004	silvia7865	24	0.708333	0	17	33	0	0.727273	0.727273	0	24	57	41	0.298246	0.719298	41	2	3101	1	0	0	False	False	False	False	False	3	False	False	False	No
253	1005	dsdt3	1	0	0	0	3	0	0	0	0	0	4	0	0	0	0	0	7	1	1	0	False	False	False	False	False	0	False	False	False	Yes
1321	1006	a871211000	19	0	0	0	14	0	0	0	0	0	33	0	0	0	0	3.07782	3751.38	1	0	0	False	False	False	False	False	3	False	False	False	No
2599	1007	iou54088	29	0	0	0	13	0	0	0	0	0	42	0	0	0	0	2.92745	6215.94	1	0	0	False	False	False	False	False	3	False	False	False	No
3856	1008	silyn	11	0	0	0	6	0	0	0	0	0	17	0	0	0	0	2.72548	1253.56	2	0	0.00183544	True	False	False	False	False	3	False	False	False	No
254	1009	dsf2dfsd	7	0.857143	6	0	0	0	0	0	0	0	7	6	0.857143	0.857143	0	0	39	1	0	0	False	False	False	False	False	3	False	False	False	Yes
1322	1010	a87786803	12	0	0	0	25	0	0.16	0.16	0	4	37	4	0	0.108108	4	2.45915	8487.75	1	0	0	False	False	False	False	False	3	False	False	False	No
2600	1011	iqgjsdc	8	0.375	0	3	10	0	0.2	0.2	0	2	18	5	0.166667	0.277778	5	0.918296	104	2	0	6.8037e-05	True	False	False	False	False	4	False	False	False	No
3857	1012	simon83823	1	0	0	0	2	0	0.5	0.5	0	1	3	1	0	0.333333	1	0	15	1	0	0	False	False	False	False	False	3	False	False	False	No
255	1013	dsf324	7	0	0	0	4	0	0	0	0	0	11	0	0	0	0	0	3.71428	2	16.74	1.23395e-05	True	False	False	False	False	4	False	False	False	Yes
1323	1014	a880605a	2	0	0	0	4	0	0	0	0	0	6	0	0	0	0	1	287.5	1	0	0	False	False	False	False	False	3	False	False	False	No
2601	1015	irene027	25	0.4	0	10	24	0	0.333333	0.333333	0	8	49	18	0.204082	0.367347	18	2.52193	698	1	0	0	False	False	False	False	False	3	False	False	False	No
3858	1016	simon89227	23	0	0	0	22	0	0	0	0	0	45	0	0	0	0	2.7744	5634.28	1	0	0.000132719	False	False	False	False	False	3	False	False	False	No
256	1017	dsf34534	2	0	0	0	0	0	0	0	0	0	2	0	0	0	0	0	24	2	0	2.62535e-06	True	False	False	False	False	4	False	False	False	Yes
1324	1018	a88105454	1	0	0	0	7	0	0	0	0	0	8	0	0	0	0	0	155	1	0	0	False	False	False	False	False	3	False	False	False	No
2602	1019	ireneyogo	1	0	0	0	2	0	0	0	0	0	3	0	0	0	0	0	591	1	0	0	False	False	False	False	False	3	False	False	False	No
3859	1020	since1220	6	0	0	0	7	0	0	0	0	0	13	0	0	0	0	1.79248	6089	1	0	0	False	False	False	False	False	3	False	False	False	No
257	1021	dsf345fd	6	1	0	6	5	0	1	1	0	5	11	11	0.545455	1	11	0	0	0	0	0	False	False	False	False	False	0	False	False	False	Yes
1325	1022	a88a1a8a0a	3	0	0	0	4	0	0	0	0	0	7	0	0	0	0	1.58496	1230.33	1	0	0	False	False	False	False	False	3	False	False	False	No
2603	1023	iridescent1634	2	0	0	0	12	0	0.5	0.5	0	6	14	6	0	0.428571	6	0	9259	1	0	0	False	False	False	False	False	3	False	False	False	No
3860	1024	sincere_lee	106	0.0471698	5	0	108	0	0.0462963	0.0462963	5	0	214	10	0.0233645	0.046729	0	3.04639	2284.87	1	0	0	False	False	False	False	False	3	False	False	False	No
258	1025	dsf43f	23	0	0	0	1	0	0	0	0	0	24	0	0	0	0	1.06128	36.25	1	16.193	5.21739e-05	False	False	False	False	False	3	False	False	False	Yes
1326	1026	a89062774	5	0	0	0	7	0	0	0	0	0	12	0	0	0	0	2.32193	1725.8	1	0	0	False	False	False	False	False	3	False	False	False	No
2604	1027	irischin1125	4	0	0	0	2	0	0	0	0	0	6	0	0	0	0	2	2587	1	0	0	False	False	False	False	False	3	False	False	False	No
3861	1028	singalong8106	176	0.102273	18	0	210	0	0.157143	0.157143	33	0	386	51	0.0466321	0.132124	0	3.27256	3224.83	1	0	0	False	False	False	False	False	3	False	False	False	No
259	1029	dsf45445	16	1	16	0	0	0	0	0	0	0	16	16	1	1	0	0	0	0	0	0	False	False	False	False	False	0	False	False	False	Yes
1327	1030	a89275a3	8	0	0	0	22	0	0	0	0	0	30	0	0	0	0	1.58496	74	1	0	0	False	False	False	False	False	3	False	False	False	No
2605	1031	irven1974	23	0.521739	0	12	24	0	0.375	0.375	0	9	47	21	0.255319	0.446809	21	2.66353	3347.45	1	0	0.000541935	False	False	False	False	False	3	False	False	False	No
3862	1032	singapore2546	38	0.0526316	0	2	29	0	0.0344828	0.0344828	0	1	67	3	0.0298507	0.0447761	3	3.1571	5762.06	1	0	0	False	False	False	False	False	3	False	False	False	No
260	1033	dsf8dsf	8	0	0	0	0	0	0	0	0	0	8	0	0	0	0	0	6	2	4	3.47292e-07	True	False	False	False	False	3	False	False	False	Yes
1328	1034	a8960164	3	0	0	0	6	0	0	0	0	0	9	0	0	0	0	1.58496	3018	2	0	1.06859e-06	True	False	False	False	False	4	False	False	False	No
2606	1035	isho0322	18	0	0	0	18	0	0	0	0	0	36	0	0	0	0	2.89542	4979.24	1	0	0	False	False	False	False	False	3	False	False	False	No
3863	1036	sisi62	66	0	0	0	68	0	0	0	0	0	134	0	0	0	0	3.34019	4042.97	1	0	0.000104909	False	False	False	False	False	3	False	False	False	No
261	1037	dsfdg	2	0.5	1	0	0	0	0	0	0	0	2	1	0.5	0.5	0	0	14	1	0	0	False	False	False	False	False	3	False	False	False	Yes
1329	1038	a8s3d2	23	0	0	0	16	0	0.375	0.375	0	6	39	6	0	0.153846	6	2.75	22640.2	1	0	0	False	False	False	False	False	3	False	False	False	No
2607	1039	isly5442	3	0	0	0	2	0	0	0	0	0	5	0	0	0	0	1.58496	311.667	1	0	0	False	False	False	False	False	3	False	False	False	No
3864	1040	sistch1995	2	0	0	0	2	0	0	0	0	0	4	0	0	0	0	1	287.5	1	0	0	False	False	False	False	False	3	False	False	False	No
262	1041	dsfds98f	5	0	0	0	8	0	0	0	0	0	13	0	0	0	0	0	17	2	1	1.60288e-07	True	False	False	False	False	4	False	False	False	Yes
1330	1042	a901041	6	0	0	0	8	0	0	0	0	0	14	0	0	0	0	2.58496	11645.5	1	0	0	False	False	False	False	False	3	False	False	False	No
2608	1043	itouchj	5	0	0	0	5	0	0	0	0	0	10	0	0	0	0	1.92193	1711.2	1	0	0	False	False	False	False	False	3	False	False	False	No
3865	1044	sjasont61	34	0	0	0	36	0	0	0	0	0	70	0	0	0	0	3.00164	7174.23	1	0	0	False	False	False	False	False	3	False	False	False	No
263	1045	dsfg345	5	0.2	1	0	0	0	0	0	0	0	5	1	0.2	0.2	0	0.918296	34.3333	1	6	2.40433e-07	False	False	False	False	False	3	False	False	False	Yes
1331	1046	a931200	4	0	0	0	7	0	0	0	0	0	11	0	0	0	0	1	899	1	0	0	False	False	False	False	False	3	False	False	False	No
2609	1047	iusdaf98sd	25	0	0	0	13	0	0	0	0	0	38	0	0	0	0	1.15955	42.1176	1	0	0	False	False	False	False	False	3	False	False	False	No
3866	1048	sjt832728	29	0	0	0	29	0	0	0	0	0	58	0	0	0	0	2.76596	1518.2	1	0	0	False	False	False	False	False	3	False	False	False	No
264	1049	dsfgpo34	9	0	0	0	9	0	0	0	0	0	18	0	0	0	0	0	9.16667	3	0	3.99246e-06	True	True	False	False	False	6	True	True	False	Yes
1332	1050	a931236280	2	0	0	0	5	0	0	0	0	0	7	0	0	0	0	1	109.5	2	0	1.06859e-06	True	False	False	False	False	4	False	False	False	No
2610	1051	ivan20011228	29	0.413793	0	12	27	0	0.407407	0.407407	0	11	56	23	0.214286	0.410714	23	1	733.5	1	1	0	False	False	False	False	False	0	False	False	False	No
3867	1052	sk880212	10	0	0	0	5	0	0	0	0	0	15	0	0	0	0	1.96096	7350.6	1	0	0	False	False	False	False	False	3	False	False	False	No
265	1053	dsfhd87	2	0.5	1	0	0	0	0	0	0	0	2	1	0.5	0.5	0	0	20	1	1	0	False	False	False	False	False	0	False	False	False	Yes
1334	1054	a935a13	7	0	0	0	1	0	0	0	0	0	8	0	0	0	0	2.52164	1645.86	1	0	0	False	False	False	False	False	3	False	False	False	No
2611	1055	iwaivcdmp3	13	0	0	0	16	0	0	0	0	0	29	0	0	0	0	2.05459	3274.08	1	0	0	False	False	False	False	False	3	False	False	False	No
3868	1056	skeiven2000	88	0	0	0	87	0	0	0	0	0	175	0	0	0	0	2.8743	3549.16	1	0	0	False	False	False	False	False	3	False	False	False	No
266	1057	dsfhgkisdfhn	1	0	0	0	0	0	0	0	0	0	1	0	0	0	0	0	7	1	1	0	False	False	False	False	False	0	False	False	False	Yes
1336	1058	a9422407058	4	0	0	0	4	0	0	0	0	0	8	0	0	0	0	2	489.25	1	0	0	False	False	False	False	False	3	False	False	False	No
2612	1059	ixdee	190	0	0	0	171	0	0	0	0	0	361	0	0	0	0	3.24207	5281.38	1	1	0	False	False	False	False	False	0	False	False	False	No
3869	1060	skeller86888	10	0	0	0	10	0	0	0	0	0	20	0	0	0	0	2.52193	1396	1	0	0	False	False	False	False	False	3	False	False	False	No
267	1061	dsfhip4	4	0	0	0	4	0	0	0	0	0	8	0	0	0	0	0	11.5	1	14	1.20216e-06	False	False	False	False	False	3	False	False	False	Yes
1337	1062	a94582003	1	0	0	0	2	0	0	0	0	0	3	0	0	0	0	0	147	1	0	0	False	False	False	False	False	3	False	False	False	No
2613	1063	izalco	181	0.0220994	3	1	181	0	0.0220994	0.0220994	3	1	362	8	0.0110497	0.0220994	2	3.25666	6999.97	1	0	0	False	False	False	False	False	3	False	False	False	No
3870	1064	skf928	36	0	0	0	35	0	0	0	0	0	71	0	0	0	0	3.01307	3083.71	1	0	0	False	False	False	False	False	3	False	False	False	No
268	1065	dsfhkdjnhhf	10	0	0	0	5	0	0	0	0	0	15	0	0	0	0	0	17.8	3	7.8	2.90523e-06	True	True	False	False	False	4	False	False	False	Yes
1338	1066	a955623	1	0	0	0	1	0	0	0	0	0	2	0	0	0	0	0	2	1	0	0	False	False	False	False	False	3	False	False	False	No
2614	1067	j_twins206	18	0	0	0	21	0	0	0	0	0	39	0	0	0	0	2.5	13671.5	1	0	0	False	False	False	False	False	3	False	False	False	No
3871	1068	skip5566	151	0.198675	0	30	157	0	0.184713	0.184713	0	29	308	59	0.0974026	0.191558	59	3.2732	4180.64	1	0	0	False	False	False	False	False	3	False	False	False	No
269	1069	dsfhsd67yuh	1	0	0	0	0	0	0	0	0	0	1	0	0	0	0	0	27	1	1	0	False	False	False	False	False	0	False	False	False	Yes
1339	1070	a9721481022	23	0	0	0	11	0	0	0	0	0	34	0	0	0	0	2.25163	9964.17	1	0	0	False	False	False	False	False	3	False	False	False	No
2615	1071	j090268	27	0	0	0	24	0	0	0	0	0	51	0	0	0	0	2.90531	2861.79	1	0	0	False	False	False	False	False	3	False	False	False	No
3872	1072	sky50815	21	0	0	0	24	0	0	0	0	0	45	0	0	0	0	2.46924	4665.71	2	0	0.00267361	True	False	False	False	False	3	False	False	False	No
270	1073	dsfjdsf98	7	0	0	0	3	0	0	0	0	0	10	0	0	0	0	0	7.42857	2	14.141	1.41455e-05	True	False	False	False	False	4	False	False	False	Yes
1340	1074	a97404637	9	0.888889	2	6	11	0	0.727273	0.727273	2	6	20	16	0.4	0.8	12	0	959	1	0	0	False	False	False	False	False	3	False	False	False	No
2616	1075	j2027668	8	0	0	0	6	0	0	0	0	0	14	0	0	0	0	1.6645	22530.9	1	0	0	False	False	False	False	False	3	False	False	False	No
3873	1076	sky52349	62	0	0	0	62	0	0	0	0	0	124	0	0	0	0	2.94971	5568.58	1	0	0	False	False	False	False	False	3	False	False	False	No
271	1077	dsfog43	1	0	0	0	1	0	0	0	0	0	2	0	0	0	0	0	39	1	1	0	False	False	False	False	False	0	False	False	False	Yes
1341	1078	a9887921	1	0	0	0	7	0	0.428571	0.428571	0	3	8	3	0	0.375	3	0	1080	1	0	0	False	False	False	False	False	3	False	False	False	No
2617	1079	j3391010	14	0	0	0	16	0	0.0625	0.0625	0	1	30	1	0	0.0333333	1	2.4183	2473.5	1	0	0	False	False	False	False	False	3	False	False	False	No
3874	1080	sky9118	16	0	0	0	18	0	0	0	0	0	34	0	0	0	0	2.75163	6566.25	1	0	0	False	False	False	False	False	3	False	False	False	No
272	1081	dsfsdf8sd7	9	0.666667	6	0	9	0	0.777778	0.777778	7	0	18	13	0.333333	0.722222	0	0	6	1	5	4.40793e-06	False	False	False	False	False	3	False	False	False	Yes
1342	1082	a9968772002	5	0	0	0	10	0	0.1	0.1	0	1	15	1	0	0.0666667	1	2.32193	4350.4	1	0	0	False	False	False	False	False	3	False	False	False	No
2618	1083	j3436chen	6	0	0	0	7	0	0	0	0	0	13	0	0	0	0	1.92193	2582.2	2	0	2.77299e-05	True	False	False	False	False	4	False	False	False	No
3875	1084	skywavelinlin	7	0.142857	0	1	8	0	0.125	0.125	0	1	15	2	0.0666667	0.133333	2	0.650022	54.6667	1	0	0	False	False	False	False	False	3	False	False	False	No
273	1085	dsfuds98fsd	52	0.134615	7	0	0	0	0	0	0	0	52	7	0.134615	0.134615	0	0	2.25	2	7.30588	1.25693e-05	True	False	False	False	False	4	False	False	False	Yes
1343	1086	a9r9t9r9	1	0	0	0	1	0	0	0	0	0	2	0	0	0	0	0	14524	1	0	0	False	False	False	False	False	3	False	False	False	No
2619	1087	j773411	117	0.264957	31	0	120	0	0.258333	0.258333	31	0	237	62	0.130802	0.261603	0	2.70108	964.337	1	0	0	False	False	False	False	False	3	False	False	False	No
3876	1088	sln924129	3	0	0	0	5	0	0	0	0	0	8	0	0	0	0	1.58496	272.333	1	0	0	False	False	False	False	False	3	False	False	False	No
274	1089	dsgdfhdfjh	1	0	0	0	0	0	0	0	0	0	1	0	0	0	0	0	21	1	0	0	False	False	False	False	False	3	False	False	False	Yes
1344	1090	a9ze390	2	0	0	0	3	0	0	0	0	0	5	0	0	0	0	0	258.5	1	0	0	False	False	False	False	False	3	False	False	False	No
2620	1091	j8078	46	0	0	0	50	0	0	0	0	0	96	0	0	0	0	2.95675	4608.12	1	0	0	False	False	False	False	False	3	False	False	False	No
3877	1092	small3389	1	0	0	0	4	0	0	0	0	0	5	0	0	0	0	0	21150	1	0	0	False	False	False	False	False	0	False	False	False	No
275	1093	dsgfdhdfh	2	0	0	0	0	0	0	0	0	0	2	0	0	0	0	1	200.5	1	0	3.97515e-05	False	False	False	False	False	3	False	False	False	Yes
1345	1094	aa_0955	1	0	0	0	1	0	0	0	0	0	2	0	0	0	0	0	333	1	0	0	False	False	False	False	False	3	False	False	False	No
2621	1095	j8339968	4	0	0	0	4	0	0	0	0	0	8	0	0	0	0	2	2763.25	1	0	0	False	False	False	False	False	3	False	False	False	No
3878	1096	small7ti	33	0	0	0	33	0	0	0	0	0	66	0	0	0	0	3.15357	4542.17	2	0	0.00185075	True	False	False	False	False	4	False	False	False	No
276	1097	dsgmjdfb87g	17	0	0	0	18	0	0	0	0	0	35	0	0	0	0	1.19818	46.7692	1	26	6.25125e-06	False	False	False	False	False	3	False	False	False	Yes
1346	1098	aa_cherry	1	0	0	0	2	0	0	0	0	0	3	0	0	0	0	0	333	1	0	0	False	False	False	False	False	3	False	False	False	No
2622	1099	j83691588	3	0	0	0	3	0	0	0	0	0	6	0	0	0	0	1.58496	4336	1	0	0	False	False	False	False	False	3	False	False	False	No
3879	1100	smallchuanchuan	30	0	0	0	36	0	0.0277778	0.0277778	0	1	66	1	0	0.0151515	1	2.95381	2396.93	1	0	0	False	False	False	False	False	3	False	False	False	No
277	1101	dsgsdhlkm	4	0	0	0	0	0	0	0	0	0	4	0	0	0	0	0	3.25	3	0	2.1234e-05	True	True	False	False	False	3	False	False	False	Yes
1347	1102	aa00000567	68	0.0147059	0	1	74	0	0.0405405	0.0405405	0	3	142	4	0.00704225	0.028169	4	2.90317	6970.02	1	0	0	False	False	False	False	False	3	False	False	False	No
2623	1103	j9452	19	0.263158	3	2	17	0	0.235294	0.235294	3	1	36	9	0.138889	0.25	3	2.4116	3708.15	1	0	0	False	False	False	False	False	3	False	False	False	No
3880	1104	smartcarp	15	0	0	0	20	0	0	0	0	0	35	0	0	0	0	2.04644	246.1	1	1	0	False	False	False	False	False	0	False	False	False	No
278	1105	dshdjgjgj	2	0	0	0	2	0	0	0	0	0	4	0	0	0	0	0	2	2	0	1.5361e-07	True	False	False	False	False	4	False	False	False	Yes
1348	1106	aa005712tw	72	0	0	0	72	0	0	0	0	0	144	0	0	0	0	3.06474	3599.21	1	0	0	False	False	False	False	False	3	False	False	False	No
2624	1107	j98755	74	0	0	0	76	0	0.0131579	0.0131579	0	1	150	1	0	0.00666667	1	3.26179	3864.56	1	0	0	False	False	False	False	False	3	False	False	False	No
3881	1108	smath375	4	0	0	0	7	0	0	0	0	0	11	0	0	0	0	0.811278	1903.5	1	0	0	False	False	False	False	False	3	False	False	False	No
279	1109	dshmnfsduf9	2	0	0	0	0	0	0	0	0	0	2	0	0	0	0	0	1	1	0	0	False	False	False	False	False	3	False	False	False	Yes
1349	1110	aa020301	1	0	0	0	2	0	0	0	0	0	3	0	0	0	0	0	7943	1	0	0	False	False	False	False	False	3	False	False	False	No
2625	1111	ja760609	45	0	0	0	27	0	0	0	0	0	72	0	0	0	0	3.15456	8798.06	1	0	0	False	False	False	False	False	3	False	False	False	No
3882	1112	smbs	2018	0.0877106	177	0	2856	0	0.135504	0.135504	387	0	4874	564	0.0363151	0.115716	0	1.26123	57.9888	1	0	0	False	False	False	False	False	3	False	False	False	No
280	1113	dsjf798dsf	1	0	0	0	0	0	0	0	0	0	1	0	0	0	0	0	23	1	0	0	False	False	False	False	False	3	False	False	False	Yes
1350	1114	aa0523aa	25	0	0	0	15	0	0	0	0	0	40	0	0	0	0	2.7744	5000.61	1	0	0	False	False	False	False	False	0	False	False	False	No
2626	1115	jacal1004	107	0	0	0	87	0	0	0	0	0	194	0	0	0	0	3.29382	3599.83	1	0	0	False	False	False	False	False	3	False	False	False	No
3883	1116	smelser30	15	0	0	0	13	0	0	0	0	0	28	0	0	0	0	2.50738	2716	1	0	0	False	False	False	False	False	3	False	False	False	No
281	1117	dsjfd9sa8f	7	0.142857	1	0	0	0	0	0	0	0	7	1	0.142857	0.142857	0	1.45915	132	1	12	1.20216e-06	False	False	False	False	False	3	False	False	False	Yes
1351	1118	aa14250tw	30	0	0	0	18	0	0	0	0	0	48	0	0	0	0	2.92353	4685.62	1	0	0	False	False	False	False	False	3	False	False	False	No
2627	1119	jack000416	63	0	0	0	62	0	0	0	0	0	125	0	0	0	0	3.23787	4048.86	1	0	0	False	False	False	False	False	3	False	False	False	No
3884	1120	smile063	6	0	0	0	7	0	0	0	0	0	13	0	0	0	0	1.92193	3550.2	1	0	0	False	False	False	False	False	3	False	False	False	No
282	1121	dsjfds8aif	2	0	0	0	3	0	0	0	0	0	5	0	0	0	0	0	4	1	1	0	False	False	False	False	False	3	False	False	False	Yes
1352	1122	aa154018	2	0	0	0	1	0	0	0	0	0	3	0	0	0	0	1	5884	1	0	0	False	False	False	False	False	3	False	False	False	No
2628	1123	jack091234	7	0.285714	0	2	7	0	0.285714	0.285714	0	2	14	4	0.142857	0.285714	4	2.32193	2647.6	1	0	0	False	False	False	False	False	3	False	False	False	No
3885	1124	smile556677	20	0	0	0	26	0	0	0	0	0	46	0	0	0	0	1.65774	8426.11	1	0	0	False	False	False	False	False	3	False	False	False	No
283	1125	dsjfsd87	8	1	8	0	0	0	0	0	0	0	8	8	1	1	0	0	0	0	0	0	False	False	False	False	False	0	False	False	False	Yes
1353	1126	aa198776	6	0	0	0	8	0	0	0	0	0	14	0	0	0	0	1.52193	1958.2	1	0	0	False	False	False	False	False	3	False	False	False	No
2629	1127	jack5308	103	0.00970874	0	1	108	0	0.00925926	0.00925926	0	1	211	2	0.00473934	0.00947867	2	3.22738	2499.84	1	0	0	False	False	False	False	False	3	False	False	False	No
3886	1128	smile8367	11	0	0	0	15	0	0	0	0	0	26	0	0	0	0	2.6416	6839.56	1	1	0	False	False	False	False	False	0	False	False	False	No
284	1129	dskgjndf9h0h	2	0.5	1	0	0	0	0	0	0	0	2	1	0.5	0.5	0	0	1	1	1	0	False	False	False	False	False	0	False	False	False	Yes
1354	1130	aa52687	158	0.139241	17	5	215	0	0.12093	0.12093	21	5	373	48	0.0589812	0.128686	10	1.70244	96.2941	1	0	0	False	False	False	False	False	3	False	False	False	No
2630	1131	jack571207	110	0.0181818	1	1	115	0	0.0173913	0.0173913	1	1	225	4	0.00888889	0.0177778	2	3.27213	2769.46	1	0	0	False	False	False	False	False	3	False	False	False	No
3887	1132	smile90049	2	0	0	0	3	0	0	0	0	0	5	0	0	0	0	1	30423.5	1	0	0	False	False	False	False	False	3	False	False	False	No
285	1133	dslfkewe	16	0.6875	0	11	36	0	0.722222	0.722222	0	26	52	37	0.211538	0.711538	37	0	1	1	1	0	False	False	False	False	False	0	False	False	False	Yes
1355	1134	aa720w	4	0	0	0	3	0	0	0	0	0	7	0	0	0	0	1.58496	3989.67	1	0	0	False	False	False	False	False	3	False	False	False	No
2631	1135	jackalpp2002	2	0	0	0	2	0	0	0	0	0	4	0	0	0	0	1	173	1	1	0	False	False	False	False	False	0	False	False	False	No
3888	1136	smilechriss	37	0.297297	0	11	31	0	0.322581	0.322581	0	10	68	21	0.161765	0.308824	21	3.15239	3397.27	1	0	0	False	False	False	False	False	3	False	False	False	No
286	1137	dssfds234	3	0	0	0	1	0	0	0	0	0	4	0	0	0	0	0	7.66667	1	6	2.40433e-07	False	False	False	False	False	3	False	False	False	Yes
1356	1138	aa7263307	8	0.125	0	1	9	0	0	0	0	0	17	1	0.0588235	0.0588235	1	1.84237	2323	1	0	0	False	False	False	False	False	3	False	False	False	No
2632	1139	jackey712003	22	0.0454545	0	1	22	0	0.0454545	0.0454545	0	1	44	2	0.0227273	0.0454545	2	2.78418	1120.2	1	0	0	False	False	False	False	False	3	False	False	False	No
3889	1140	smjyp520	4	0.25	0	1	3	0	0.333333	0.333333	0	1	7	2	0.142857	0.285714	2	0.918296	1580.67	1	0	0	False	False	False	False	False	3	False	False	False	No
287	1141	dsxdf2	7	0.142857	1	0	9	0	0.111111	0.111111	1	0	16	2	0.0625	0.125	0	0.811278	42	1	0	4.32779e-06	False	False	False	False	False	3	False	False	False	Yes
1357	1142	aa770928tw	43	0	0	0	49	0	0	0	0	0	92	0	0	0	0	3.10846	5517.06	1	0	0	False	False	False	False	False	3	False	False	False	No
2633	1143	jackson1000114	3	0	0	0	5	0	0	0	0	0	8	0	0	0	0	0.918296	130	1	0	0	False	False	False	False	False	3	False	False	False	No
3890	1144	snic5844	23	0	0	0	16	0	0	0	0	0	39	0	0	0	0	2.61058	7950.86	1	0	0	False	False	False	False	False	3	False	False	False	No
288	1145	duf8s7daf	2	0	0	0	0	0	0	0	0	0	2	0	0	0	0	0	71	1	1	0	False	False	False	False	False	0	False	False	False	Yes
1358	1146	aa77255	599	0.442404	265	0	768	0	0.401042	0.401042	308	0	1367	573	0.193855	0.419166	0	2.97931	1118.23	1	0	0	False	False	False	False	False	3	False	False	False	No
2634	1147	jackson19670210	47	0	0	0	52	0	0	0	0	0	99	0	0	0	0	3.12306	3373.18	1	0	0	False	False	False	False	False	3	False	False	False	No
3891	1148	sning319	9	0	0	0	12	0	0.0833333	0.0833333	1	0	21	1	0	0.047619	0	1.89106	243.667	1	0	0	False	False	False	False	False	3	False	False	False	No
289	1149	duf9ds8fsda	24	0.958333	23	0	0	0	0	0	0	0	24	23	0.958333	0.958333	0	0	5	1	1	0	False	False	False	False	False	0	False	False	False	Yes
1359	1150	aa77778888	4	0	0	0	3	0	0	0	0	0	7	0	0	0	0	2	12579	1	0	0	False	False	False	False	False	3	False	False	False	No
2635	1151	jackson2006	158	0	0	0	157	0	0	0	0	0	315	0	0	0	0	3.21484	3382.33	1	0	0	False	False	False	False	False	3	False	False	False	No
3892	1152	snoopy09060814	49	0	0	0	51	0	0	0	0	0	100	0	0	0	0	2.66293	422.958	1	0	0	False	False	False	False	False	3	False	False	False	No
290	1153	durunluog	1	0	0	0	0	0	0	0	0	0	1	0	0	0	0	0	190	1	1	0	False	False	False	False	False	0	False	False	False	Yes
1360	1154	aa78910205	27	0	0	0	21	0	0	0	0	0	48	0	0	0	0	2.91969	6801.45	1	0	0	False	False	False	False	False	3	False	False	False	No
2636	1155	jacky_wu78611	55	0.218182	12	0	66	0	0.272727	0.272727	14	4	121	30	0.0991736	0.247934	4	3.00733	1709	1	0	0	False	False	False	False	False	3	False	False	False	No
3893	1156	so58337522	1	0	0	0	3	0	0	0	0	0	4	0	0	0	0	0	2923	1	0	0	False	False	False	False	False	3	False	False	False	No
291	1157	dwbuifeg	21	0.904762	19	0	5	0	0.6	0.6	3	0	26	22	0.730769	0.846154	0	0	26.5	1	4	8.01442e-08	False	False	False	False	False	3	False	False	False	Yes
1361	1158	aa810228	2	0.5	0	1	37	0	0.351351	0.351351	0	13	39	14	0.025641	0.358974	14	0	34	4	0	1.72568e-05	True	True	True	False	False	4	False	False	False	No
2637	1159	jacky60909	8	0	0	0	12	0	0.0833333	0.0833333	0	1	20	1	0	0.05	1	1.84237	13564.4	1	0	0	False	False	False	False	False	0	False	False	False	No
3894	1160	so76977435	6	0	0	0	1	0	0	0	0	0	7	0	0	0	0	1.9183	3804.5	1	0	0	False	False	False	False	False	3	False	False	False	No
292	1161	dweioflrjegr	7	0	0	0	9	0	0	0	0	0	16	0	0	0	0	0	13.2	3	10.2448	2.93003e-06	True	True	False	False	False	5	True	False	False	Yes
1362	1162	aa931213	4	0.25	0	1	4	0	0.25	0.25	0	1	8	2	0.125	0.25	2	1	2659	1	0	0	False	False	False	False	False	3	False	False	False	No
2638	1163	jackycychen	78	0.0897436	0	7	84	0	0.0833333	0.0833333	0	7	162	14	0.0432099	0.0864198	14	2.94634	4257.75	1	0	0	False	False	False	False	False	3	False	False	False	No
3895	1164	socrazy73	36	0.0555556	1	1	11	0	0.0909091	0.0909091	1	0	47	3	0.0425532	0.0638298	1	2.78064	5423.94	1	0	0	False	False	False	False	False	3	False	False	False	No
293	1165	dweiofrgre	7	1	7	0	0	0	0	0	0	0	7	7	1	1	0	0	0	0	0	0	False	False	False	False	False	0	False	False	False	Yes
1363	1166	aa95004	26	0.0384615	0	1	27	0	0.037037	0.037037	0	1	53	2	0.0188679	0.0377358	2	2.9477	5437.22	1	0	0	False	False	False	False	False	3	False	False	False	No
2639	1167	jackyo70163	8	0	0	0	9	0	0	0	0	0	17	0	0	0	0	1.9183	22110.5	1	0	0	False	False	False	False	False	3	False	False	False	No
3897	1168	sogo0808	42	0.047619	2	0	45	0	0.0444444	0.0444444	2	0	87	4	0.0229885	0.045977	0	2.99173	2313.44	1	0	0	False	False	False	False	False	3	False	False	False	No
294	1169	dwioqferfgr	144	0.0763889	11	0	102	0	0.0882353	0.0882353	9	0	246	20	0.0447154	0.0813008	0	1.73307	90.9787	2	190.329	0.00520627	True	False	False	False	False	3	False	False	False	Yes
1364	1170	aaa024666	7	0	0	0	6	0	0	0	0	0	13	0	0	0	0	2.80735	3888.86	1	0	0	False	False	False	False	False	3	False	False	False	No
2640	1171	jackzlyre	206	0.252427	1	51	211	0	0.241706	0.241706	2	49	417	103	0.1247	0.247002	100	3.01943	5644.25	1	0	0	False	False	False	False	False	3	False	False	False	No
3898	1172	sogooooxxd	10	0	0	0	10	6	1	0.625	0	10	26	10	0	0.384615	10	0.811278	57	2	0	4.15147e-06	True	False	False	False	False	4	False	False	False	No
295	1173	dwuiqfregr	18	0.0555556	1	0	26	0	0.0384615	0.0384615	1	0	44	2	0.0227273	0.0454545	0	1.53291	61.6667	1	30	8.41514e-06	False	False	False	False	False	3	False	False	False	Yes
1365	1174	aaa120750632a	20	0	0	0	25	0	0	0	0	0	45	0	0	0	0	1.95268	130.211	1	0	0	False	False	False	False	False	3	False	False	False	No
2641	1175	jackzx0938238226	10	0	0	0	1	0	0	0	0	0	11	0	0	0	0	2.72193	3952.5	1	0	0	False	False	False	False	False	3	False	False	False	No
3899	1176	somebody7445	4	0	0	0	1	0	0	0	0	0	5	0	0	0	0	1.5	421.25	1	0	0	False	False	False	False	False	3	False	False	False	No
296	1177	dwuqifker	11	0	0	0	8	0	0	0	0	0	19	0	0	0	0	0	16.1429	3	12.845	2.26121e-06	True	True	False	False	False	4	False	False	False	Yes
1366	1178	aaa123456789006tw	19	0	0	0	17	0	0	0	0	0	36	0	0	0	0	2.64644	8303.7	1	0	0	False	False	False	False	False	3	False	False	False	No
2642	1179	jagene1112	20	0	0	0	23	0	0	0	0	0	43	0	0	0	0	2.64559	9764.57	1	0	0	False	False	False	False	False	3	False	False	False	No
3900	1180	sonsy001	21	0.047619	0	1	19	0	0.0526316	0.0526316	0	1	40	2	0.025	0.05	2	2.61058	3140.36	1	0	0	False	False	False	False	False	3	False	False	False	No
297	1181	dxasef	11	0.0909091	1	0	8	0	0	0	0	0	19	1	0.0526316	0.0526316	0	1.06128	73	1	16	2.24404e-06	False	False	False	False	False	3	False	False	False	Yes
1367	1182	aaa17998	1	0	0	0	2	0	0	0	0	0	3	0	0	0	0	0	6331	1	0	0	False	False	False	False	False	3	False	False	False	No
2643	1183	jak5589410	11	0	0	0	13	0	0	0	0	0	24	0	0	0	0	2.75	2880.88	1	0	3.97515e-05	False	False	False	False	False	3	False	False	False	No
3901	1184	sonyeric928	30	0.0333333	0	1	32	0	0.03125	0.03125	0	1	62	2	0.016129	0.0322581	2	2.8152	2968.05	1	0	0	False	False	False	False	False	3	False	False	False	No
298	1185	dyf769601	5	0	0	0	0	0	0	0	0	0	5	0	0	0	0	0	11	1	5.6	1.36245e-06	False	False	False	False	False	0	False	False	False	Yes
1368	1186	aaa249328	99	0	0	0	99	0	0	0	0	0	198	0	0	0	0	2.94728	3282.92	1	0	0	False	False	False	False	False	3	False	False	False	No
2644	1187	jam090	79	0.0253165	1	1	80	0	0.025	0.025	2	0	159	4	0.0125786	0.0251572	1	3.12037	4877.36	1	0	0	False	False	False	False	False	3	False	False	False	No
3902	1188	sop6565	476	0.0105042	0	5	478	0	0.0104603	0.0104603	0	5	954	10	0.00524109	0.0104822	10	3.27561	2891.53	2	0	2.27966e-05	True	False	False	False	False	4	False	False	False	No
299	1189	dzhit	2	0	0	0	0	0	0	0	0	0	2	0	0	0	0	0	9	1	1	0	False	False	False	False	False	0	False	False	False	Yes
1369	1190	aaa310368	3	0	0	0	1	0	0	0	0	0	4	0	0	0	0	1.58496	1324.33	1	0	0	False	False	False	False	False	3	False	False	False	No
2645	1191	james12271610	300	0	0	0	299	0	0	0	0	0	599	0	0	0	0	3.18131	2060.38	1	0	0	False	False	False	False	False	3	False	False	False	No
3903	1192	sophya12345	51	0	0	0	57	0	0	0	0	0	108	0	0	0	0	3.08309	2269.23	1	0	0	False	False	False	False	False	3	False	False	False	No
300	1193	e03662255	2	0	0	0	0	0	0	0	0	0	2	0	0	0	0	0	9.5	1	4	8.01442e-08	False	False	False	False	False	3	False	False	False	Yes
1370	1194	aaa32197	3	0	0	0	2	0	0	0	0	0	5	0	0	0	0	1.58496	4103.67	1	0	0	False	False	False	False	False	3	False	False	False	No
2646	1195	james62107	3	0	0	0	1	0	0	0	0	0	4	0	0	0	0	1.58496	2079	1	0	0	False	False	False	False	False	3	False	False	False	No
3904	1196	sos3322	150	0.186667	0	28	157	0	0.191083	0.191083	0	30	307	58	0.0912052	0.188925	58	3.19245	3356.65	1	0	0	False	False	False	False	False	3	False	False	False	No
301	1197	e2012345	2	0	0	0	1	0	0	0	0	0	3	0	0	0	0	0	1881	1	0	0	False	False	False	False	False	3	False	False	False	Yes
1371	1198	aaa3476	3	0	0	0	2	0	0	0	0	0	5	0	0	0	0	1.58496	3052.67	1	0	0	False	False	False	False	False	3	False	False	False	No
2647	1199	james760122	2	0	0	0	1	0	0	0	0	0	3	0	0	0	0	1	107	1	0	0	False	False	False	False	False	3	False	False	False	No
3905	1200	sosa1713	62	0	0	0	55	0	0	0	0	0	117	0	0	0	0	2.87821	6664.11	1	0	0	False	False	False	False	False	3	False	False	False	No
302	1201	e465454111110	5	0.6	3	0	2	0	0.5	0.5	1	0	7	4	0.428571	0.571429	0	0	7	1	0	2.24404e-06	False	False	False	False	False	3	False	False	False	Yes
1372	1202	aaa54801	3	0	0	0	1	0	0	0	0	0	4	0	0	0	0	1	724.5	1	0	0	False	False	False	False	False	3	False	False	False	No
2648	1203	jamesace	2637	0.0845658	212	11	3295	0	0.0813354	0.0813354	259	9	5932	491	0.0375927	0.0827714	20	2.00157	166.34	1	0	0	False	False	False	False	False	3	False	False	False	No
3906	1204	sosyyz	21	0	0	0	19	0	0	0	0	0	40	0	0	0	0	2.93983	4552.35	1	0	0	False	False	False	False	False	3	False	False	False	No
303	1205	e496545	2	1	2	0	0	0	0	0	0	0	2	2	1	1	0	0	0	0	0	0	False	False	False	False	False	0	False	False	False	Yes
1373	1206	aaa559977tw	8	0	0	0	3	0	0	0	0	0	11	0	0	0	0	1.9183	20706.7	1	0	0	False	False	False	False	False	3	False	False	False	No
2649	1207	jamin963	62	0	0	0	70	0	0	0	0	0	132	0	0	0	0	3.0478	3026.65	1	1	0	False	False	False	False	False	0	False	False	False	No
3907	1208	souwen	142	0.225352	0	32	153	0	0.235294	0.235294	0	36	295	68	0.108475	0.230508	68	3.15869	2320.74	1	0	0	False	False	False	False	False	3	False	False	False	No
304	1209	e8564123	18	0	0	0	0	0	0	0	0	0	18	0	0	0	0	0	4.8	1	10	4.47205e-05	False	False	False	False	False	0	False	False	False	Yes
1374	1210	aaa666vv	1	0	0	0	2	0	0	0	0	0	3	0	0	0	0	0	41	1	0	0	False	False	False	False	False	3	False	False	False	No
2650	1211	jan2832	39	0	0	0	38	0	0	0	0	0	77	0	0	0	0	2.69701	1013.44	1	0	0	False	False	False	False	False	3	False	False	False	No
3908	1212	speed520	160	0.06875	10	1	181	0	0.0662983	0.0662983	11	1	341	23	0.0322581	0.0674487	2	2.85471	929.459	1	0	0	False	False	False	False	False	3	False	False	False	No
305	1213	earwoo	5	0.2	1	0	11	0	0.0909091	0.0909091	1	0	16	2	0.0625	0.125	0	0.811278	53.5	1	8.14286	1.20216e-06	False	False	False	False	False	3	False	False	False	Yes
1375	1214	aaa678l	7	0	0	0	23	0	0.0434783	0.0434783	0	1	30	1	0	0.0333333	1	1.5	673.5	3	0	4.14063e-05	True	True	False	False	False	4	False	False	False	No
2651	1215	janet0114	4	0	0	0	7	0	0.571429	0.571429	0	4	11	4	0	0.363636	4	2	2517.75	2	0	1.13699e-05	True	False	False	False	False	4	False	False	False	No
3909	1216	speed8214	14	0.0714286	1	0	17	0	0.0588235	0.0588235	1	0	31	2	0.0322581	0.0645161	0	2.84535	3476.82	1	0	0	False	False	False	False	False	3	False	False	False	No
306	1217	edo45	237	0.0548523	13	0	322	0	0.0807453	0.0807453	26	0	559	39	0.0232558	0.0697674	0	2.51897	290.042	2	41.3867	0.000213023	True	False	False	False	False	4	False	False	False	Yes
1376	1218	aaa7w9978	2	0	0	0	6	0	0	0	0	0	8	0	0	0	0	0	3212	1	0	0	False	False	False	False	False	3	False	False	False	No
2652	1219	janet588588	7	0	0	0	7	0	0	0	0	0	14	0	0	0	0	1.9183	1375.33	1	0	0	False	False	False	False	False	3	False	False	False	No
3910	1220	spidermanyaya	28153	0.0727809	2049	0	46856	0	0.06584	0.06584	3085	0	75009	5134	0.0273167	0.0684451	0	1.34273	57.0734	1	0	0	False	False	False	False	False	3	False	False	False	No
307	1221	efoi4	1	0	0	0	0	0	0	0	0	0	1	0	0	0	0	0	5	1	0	0	False	False	False	False	False	3	False	False	False	Yes
1377	1222	aaaa101011	15	0	0	0	1	0	0	0	0	0	16	0	0	0	0	2.47291	2539.8	1	0	0	False	False	False	False	False	3	False	False	False	No
2653	1223	janet80046	2	0	0	0	20	0	0	0	0	0	22	0	0	0	0	0	18	2	0	2.04368e-06	True	False	False	False	False	4	False	False	False	No
3911	1224	spike0936197191	198	0.106061	5	16	163	0	0.0674847	0.0674847	5	6	361	32	0.0581717	0.0886427	22	3.17387	2329.53	1	0	0	False	False	False	False	False	3	False	False	False	No
308	1225	egasc	6	0	0	0	2	0	0	0	0	0	8	0	0	0	0	0	12	1	8	4.80865e-07	False	False	False	False	False	3	False	False	False	Yes
1378	1226	aaaaa6425	1	0	0	0	1	0	0	0	0	0	2	0	0	0	0	0	89	1	0	0	False	False	False	False	False	3	False	False	False	No
2654	1227	janice0218	6	0	0	0	6	0	0	0	0	0	12	0	0	0	0	1.37095	6296.6	1	0	0	False	False	False	False	False	3	False	False	False	No
3912	1228	sport_1018	35	0	0	0	38	0	0	0	0	0	73	0	0	0	0	3.24042	4491.93	1	0	0	False	False	False	False	False	3	False	False	False	No
309	1229	egax	1	1	0	1	1	0	1	1	0	1	2	2	0.5	1	2	0	0	0	0	0	False	False	False	False	False	0	False	False	False	Yes
1379	1230	aaalll109	1	0	0	0	16	0	0	0	0	0	17	0	0	0	0	0	3293	4	0	5.95011e-06	True	True	True	False	False	4	False	False	False	No
2655	1231	jansonjanson4	7	0.142857	1	0	7	0	0.142857	0.142857	1	0	14	2	0.0714286	0.142857	0	1.37095	1792.8	1	0	0	False	False	False	False	False	3	False	False	False	No
3913	1232	spring20070227	62	0.0967742	1	5	69	0	0.101449	0.101449	1	6	131	13	0.0458015	0.0992366	11	3.05069	3190.3	1	0	0	False	False	False	False	False	3	False	False	False	No
310	1233	ehgxc	4	0	0	0	0	0	0	0	0	0	4	0	0	0	0	0	3	2	4.5	3.24584e-06	True	False	False	False	False	4	False	False	False	Yes
1380	1234	aachihauli	53	0.320755	11	6	40	0	0.375	0.375	11	4	93	32	0.182796	0.344086	10	2.57019	435.848	1	0	0	False	False	False	False	False	3	False	False	False	No
2656	1235	janwa1102	32	0	0	0	41	0	0	0	0	0	73	0	0	0	0	2.5	1655.5	1	0	0	False	False	False	False	False	3	False	False	False	No
3914	1236	spy8401	33	0	0	0	17	0	0	0	0	0	50	0	0	0	0	3.06662	10322.6	1	0	0	False	False	False	False	False	3	False	False	False	No
311	1237	eihao	4	0.5	2	0	0	0	0	0	0	0	4	2	0.5	0.5	0	0	10	1	4	8.01442e-08	False	False	False	False	False	0	False	False	False	Yes
1381	1238	aadsl5566tw	1	0	0	0	3	0	0	0	0	0	4	0	0	0	0	0	336	2	0	5.4498e-07	True	False	False	False	False	3	False	False	False	No
2657	1239	jasd7iw	2	0	0	0	3	0	0	0	0	0	5	0	0	0	0	0	11	1	0	0	False	False	False	False	False	3	False	False	False	No
3915	1240	ss199767	4	0	0	0	5	0	0	0	0	0	9	0	0	0	0	1.5	7432.75	1	0	0	False	False	False	False	False	3	False	False	False	No
312	1241	eism2003	5	0.2	1	0	0	0	0	0	0	0	5	1	0.2	0.2	0	0	14.3333	1	0	0.000132799	False	False	False	False	False	3	False	False	False	Yes
1382	1242	aaggjj7788	6	0	0	0	6	0	0	0	0	0	12	0	0	0	0	1.92193	1636.6	1	0	0	False	False	False	False	False	3	False	False	False	No
2658	1243	jasmine8877	756	0.0753968	51	6	830	0	0.0771084	0.0771084	58	6	1586	121	0.0359395	0.0762926	12	2.77634	1145.65	1	0	0	False	False	False	False	False	3	False	False	False	No
3916	1244	ss670827	19	0	0	0	17	0	0	0	0	0	36	0	0	0	0	2.83659	3392.39	1	1	0	False	False	False	False	False	0	False	False	False	No
313	1245	elamyanruyan	6	1	6	0	6	0	1	1	6	0	12	12	0.5	1	0	0	0	0	0	0	False	False	False	False	False	0	False	False	False	Yes
1383	1246	aahsien	12	0	0	0	9	0	0	0	0	0	21	0	0	0	0	2.2999	6567.55	1	0	0	False	False	False	False	False	3	False	False	False	No
2659	1247	jason169916	166	0	0	0	184	0	0	0	0	0	350	0	0	0	0	3.09644	5489.84	1	0	0	False	False	False	False	False	3	False	False	False	No
3917	1248	ss772233	60	0	0	0	64	0	0	0	0	0	124	0	0	0	0	2.89797	4009.78	1	0	0	False	False	False	False	False	3	False	False	False	No
314	1249	elrm1972	55	0.927273	48	3	43	0	0.906977	0.906977	38	1	98	90	0.520408	0.918367	4	0	123	1	0	0	False	False	False	False	False	3	False	False	False	Yes
1384	1250	aai0418	4	0	0	0	4	0	0	0	0	0	8	0	0	0	0	2	9683	1	0	0	False	False	False	False	False	3	False	False	False	No
2660	1251	jason521015	422	0	0	0	438	0	0	0	0	0	860	0	0	0	0	3.15671	1715.48	1	0	0	False	False	False	False	False	3	False	False	False	No
3918	1252	ss88068s	7	0	0	0	7	0	0	0	0	0	14	0	0	0	0	1.92193	746.2	1	0	0	False	False	False	False	False	3	False	False	False	No
315	1253	eohdn	16	0.75	12	0	2	0	0.5	0.5	1	0	18	13	0.666667	0.722222	0	1	43.5	1	8	4.80865e-07	False	False	False	False	False	3	False	False	False	Yes
1385	1254	aanna147852tw	1	0	0	0	0	0	0	0	0	0	1	0	0	0	0	0	7	1	0	0	False	False	False	False	False	3	False	False	False	No
2661	1255	jasonfox	67	0.0149254	0	1	79	0	0.0126582	0.0126582	0	1	146	2	0.00684932	0.0136986	2	3.17649	5226.15	1	0	0	False	False	False	False	False	3	False	False	False	No
3919	1256	ss910013	29	0	0	0	30	0	0	0	0	0	59	0	0	0	0	2.65505	2721.42	1	0	0	False	False	False	False	False	3	False	False	False	No
316	1257	eous1998	17	0.352941	6	0	0	0	0	0	0	0	17	6	0.352941	0.352941	0	0.468996	19.7	3	0	0.000969529	True	True	False	False	False	4	False	False	False	Yes
1386	1258	aannowen	2	0	0	0	3	0	0	0	0	0	5	0	0	0	0	1	153	2	0	3.48627e-07	True	False	False	False	False	3	False	False	False	No
2662	1259	jasonnt_da	8	0	0	0	4	0	0	0	0	0	12	0	0	0	0	2	2641.62	1	0	0	False	False	False	False	False	3	False	False	False	No
3920	1260	ssa037	23	0.173913	1	3	26	0	0.153846	0.153846	1	3	49	8	0.0816327	0.163265	6	2.89542	3329.35	1	0	0	False	False	False	False	False	3	False	False	False	No
317	1261	erdan	9	0.555556	5	0	0	0	0	0	0	0	9	5	0.555556	0.555556	0	0	1	1	1	0	False	False	False	False	False	0	False	False	False	Yes
1387	1262	aaooi	1	0	0	0	3	0	0	0	0	0	4	0	0	0	0	0	1649	2	0	2.76498e-07	True	False	False	False	False	3	False	False	False	No
2663	1263	jasonyic	15	0.0666667	0	1	12	0	0	0	0	0	27	1	0.037037	0.037037	1	2.52206	13513.5	1	0	0	False	False	False	False	False	3	False	False	False	No
3921	1264	ssaab	113	0	0	0	116	0	0	0	0	0	229	0	0	0	0	3.1348	4482.93	1	0	0	False	False	False	False	False	3	False	False	False	No
318	1265	erewd	7	0	0	0	0	0	0	0	0	0	7	0	0	0	0	0.591673	19.7143	2	13.3358	0.00067491	True	False	False	False	False	4	False	False	False	Yes
1388	1266	aaq565416	46	0.0652174	0	3	49	0	0	0	0	0	95	3	0.0315789	0.0315789	3	3.08797	4735.18	1	0	0	False	False	False	False	False	3	False	False	False	No
2664	1267	jauying888	10	0.3	3	0	6	0	0.5	0.5	3	0	16	6	0.1875	0.375	0	1.9183	112.5	1	0	0	False	False	False	False	False	3	False	False	False	No
3922	1268	ssp1239	20	0	0	0	21	0	0	0	0	0	41	0	0	0	0	2.933	1770.94	1	0	0	False	False	False	False	False	3	False	False	False	No
319	1269	erger15	10	0	0	0	2	0	0	0	0	0	12	0	0	0	0	1.15678	39.5	1	20	3.60649e-06	False	False	False	False	False	3	False	False	False	Yes
1389	1270	aaron_soho	7	0	0	0	7	0	0	0	0	0	14	0	0	0	0	1.84237	5951.29	1	0	0	False	False	False	False	False	3	False	False	False	No
2665	1271	jay19431943	2	0	0	0	2	0	0	0	0	0	4	0	0	0	0	1	2177	1	0	0	False	False	False	False	False	3	False	False	False	No
3923	1272	sspslove13	80	0	0	0	82	0	0	0	0	0	162	0	0	0	0	3.08267	1368.2	1	0	0	False	False	False	False	False	3	False	False	False	No
320	1273	ergerc167	7	0.142857	1	0	7	0	0.142857	0.142857	1	0	14	2	0.0714286	0.142857	0	0.918296	27.3333	1	12	1.20216e-06	False	False	False	False	False	3	False	False	False	Yes
1390	1274	aaws_a3665	329	0.0455927	15	0	350	0	0.0514286	0.0514286	18	0	679	33	0.0220913	0.0486009	0	3.24103	2699.77	1	0	0	False	False	False	False	False	3	False	False	False	No
2666	1275	jay2261992	99	0.111111	0	11	93	0	0.107527	0.107527	0	10	192	21	0.0572917	0.109375	21	2.9761	4086.98	1	0	0	False	False	False	False	False	3	False	False	False	No
3924	1276	st_03041019	1	0	0	0	1	0	0	0	0	0	2	0	0	0	0	0	117	1	0	0	False	False	False	False	False	3	False	False	False	No
321	1277	eriufdsnufew	6	0	0	0	0	0	0	0	0	0	6	0	0	0	0	0	7.6	1	11	1.4426e-06	False	False	False	False	False	0	False	False	False	Yes
1391	1278	ab30544	3	0	0	0	7	0	0.142857	0.142857	0	1	10	1	0	0.1	1	1.58496	5263.33	1	0	0	False	False	False	False	False	0	False	False	False	No
2667	1279	jay701335	62	0.258065	14	2	73	0	0.232877	0.232877	15	2	135	33	0.118519	0.244444	4	2.56564	617.364	1	0	0	False	False	False	False	False	3	False	False	False	No
3925	1280	st10959	48	0	0	0	44	0	0	0	0	0	92	0	0	0	0	3.19229	5159.88	1	0	0	False	False	False	False	False	3	False	False	False	No
322	1281	erpla	18	0.0555556	1	0	1	0	0	0	0	0	19	1	0.0526316	0.0526316	0	0.353359	9.53333	1	35.9091	3.64656e-05	False	False	False	False	False	3	False	False	False	Yes
1392	1282	ab70780212	4	0	0	0	5	0	0	0	0	0	9	0	0	0	0	1.5	1311.75	1	1	0	False	False	False	False	False	0	False	False	False	No
2668	1283	jct8118	44	0.0227273	0	1	50	0	0.02	0.02	0	1	94	2	0.0106383	0.0212766	2	2.90203	5151.82	1	0	0	False	False	False	False	False	3	False	False	False	No
3926	1284	st1981	296	0.131757	38	1	345	0	0.153623	0.153623	52	1	641	92	0.0608424	0.143526	2	2.53767	599.888	1	0	0	False	False	False	False	False	3	False	False	False	No
323	1285	ert5445	2	0	0	0	0	0	0	0	0	0	2	0	0	0	0	0	1	2	2	4.00721e-08	True	False	False	False	False	0	False	False	False	Yes
1393	1286	abacadfj	26	0.0384615	0	1	23	0	0	0	0	0	49	1	0.0204082	0.0204082	1	2.66013	6026.12	1	0	0	False	False	False	False	False	3	False	False	False	No
2669	1287	jeff_cc	157	0.044586	0	7	108	0	0.0648148	0.0648148	0	7	265	14	0.0264151	0.0528302	14	3.29915	3509.13	1	0	0	False	False	False	False	False	3	False	False	False	No
3927	1288	st25466	7	0.142857	0	1	9	0	0.111111	0.111111	0	1	16	2	0.0625	0.125	2	2.58496	3429.67	1	0	0	False	False	False	False	False	3	False	False	False	No
324	1289	ertryty	1	0	0	0	0	0	0	0	0	0	1	0	0	0	0	0	62	1	1	0	False	False	False	False	False	0	False	False	False	Yes
1394	1290	abb102030	28	0.0357143	0	1	22	0	0	0	0	0	50	1	0.02	0.02	1	2.13339	5966.94	1	0	0	False	False	False	False	False	3	False	False	False	No
2670	1291	jeffery7	4	0	0	0	4	0	0	0	0	0	8	0	0	0	0	0.918296	275.333	1	0	0	False	False	False	False	False	3	False	False	False	No
3928	1292	st40133s	19	0	0	0	19	0	0	0	0	0	38	0	0	0	0	2.62352	4277.15	1	0	3.60649e-06	False	False	False	False	False	3	False	False	False	No
325	1293	esadjp34	1	0	0	0	0	0	0	0	0	0	1	0	0	0	0	0	29	1	0	0	False	False	False	False	False	3	False	False	False	Yes
1395	1294	abba79979	3	0	0	0	6	0	0	0	0	0	9	0	0	0	0	0	4710	1	0	0	False	False	False	False	False	3	False	False	False	No
2671	1295	jeffmao	158	0.00632911	0	1	158	0	0.00632911	0.00632911	0	1	316	2	0.00316456	0.00632911	2	3.26123	3745.92	1	0	0	False	False	False	False	False	3	False	False	False	No
3929	1296	st613241220	181	0.359116	43	22	237	0	0.409283	0.409283	75	22	418	162	0.155502	0.38756	44	2.55349	364.988	1	0	0	False	False	False	False	False	3	False	False	False	No
326	1297	essenwang	3	0	0	0	0	0	0	0	0	0	3	0	0	0	0	0	78	1	1	0	False	False	False	False	False	0	False	False	False	Yes
1396	1298	abbie830210	5	0.2	0	1	3	0	0	0	0	0	8	1	0.125	0.125	1	1.5	674	1	0	0	False	False	False	False	False	3	False	False	False	No
2672	1299	jeffrey0622	1	0	0	0	2	0	0	0	0	0	3	0	0	0	0	0	2085	1	1	0	False	False	False	False	False	0	False	False	False	No
3930	1300	st813058	20	0	0	0	11	0	0	0	0	0	31	0	0	0	0	2.99662	6615.56	1	0	0	False	False	False	False	False	3	False	False	False	No
327	1301	ethe2008	16	0.3125	5	0	0	0	0	0	0	0	16	5	0.3125	0.3125	0	0.865857	35.2727	2	0	0.000723799	True	False	False	False	False	4	False	False	False	Yes
1397	1302	abc_5050	17	0.117647	0	2	20	0	0.1	0.1	0	2	37	4	0.0540541	0.108108	4	2.77736	5991.92	1	0	0	False	False	False	False	False	3	False	False	False	No
2673	1303	jeffrey32183	16	0	0	0	15	0	0	0	0	0	31	0	0	0	0	2.87314	2591.54	1	0	0	False	False	False	False	False	3	False	False	False	No
3932	1304	st930499	3	0	0	0	106	0	0.528302	0.528302	0	56	109	56	0	0.513761	56	1.58496	11244.7	1	0	0	False	False	False	False	False	3	False	False	False	No
328	1305	ethio4	15	0	0	0	1	0	0	0	0	0	16	0	0	0	0	0.503258	29.5556	1	18.2857	0.000509316	False	False	False	False	False	3	False	False	False	Yes
1398	1306	abc0917324736	12	0	0	0	11	0	0	0	0	0	23	0	0	0	0	1	124.5	1	0	0	False	False	False	False	False	3	False	False	False	No
2674	1307	jeffrey881101	1	0	0	0	1	0	0	0	0	0	2	0	0	0	0	0	31	1	0	0	False	False	False	False	False	3	False	False	False	No
3933	1308	st952one	21	0.047619	0	1	17	0	0.0588235	0.0588235	0	1	38	2	0.0263158	0.0526316	2	2.72193	2847.5	1	0	0	False	False	False	False	False	3	False	False	False	No
329	1309	euiy98wi	13	0	0	0	0	0	0	0	0	0	13	0	0	0	0	0.439497	6.27273	2	24.4653	1.14558e-05	True	False	False	False	False	3	False	False	False	Yes
1399	1310	abc1436799	154	0.038961	0	6	160	0	0.0375	0.0375	0	6	314	12	0.0191083	0.0382166	12	2.72519	5623.28	1	0	0	False	False	False	False	False	3	False	False	False	No
2675	1311	jenlket0027	3	0	0	0	2	0	0	0	0	0	5	0	0	0	0	1.58496	1024	1	0	0	False	False	False	False	False	0	False	False	False	No
3934	1312	stacy3945	3	0	0	0	7	0	0	0	0	0	10	0	0	0	0	0.918296	25.3333	1	0	0	False	False	False	False	False	3	False	False	False	No
330	1313	evcwd	1	0	0	0	1	0	0	0	0	0	2	0	0	0	0	0	13	1	1	0	False	False	False	False	False	0	False	False	False	Yes
1400	1314	abc154325	6	0	0	0	7	0	0	0	0	0	13	0	0	0	0	1.9183	1407.33	1	0	0	False	False	False	False	False	3	False	False	False	No
2676	1315	jenny6111a	29	0.0344828	0	1	27	0	0	0	0	0	56	1	0.0178571	0.0178571	1	3.22347	6866.4	1	0	0	False	False	False	False	False	3	False	False	False	No
3935	1316	stage_gar	10	0	0	0	14	0	0	0	0	0	24	0	0	0	0	2.58496	5679	1	0	0	False	False	False	False	False	3	False	False	False	No
331	1317	ewr43	1	0	0	0	0	0	0	0	0	0	1	0	0	0	0	0	4	1	0	0	False	False	False	False	False	3	False	False	False	Yes
1401	1318	abc201314	3	0	0	0	8	0	0.25	0.25	0	2	11	2	0	0.181818	2	1	126	1	0	2.88519e-06	False	False	False	False	False	3	False	False	False	No
2677	1319	jenny84125	8	0	0	0	1	0	0	0	0	0	9	0	0	0	0	2.5	3455.38	1	0	0	False	False	False	False	False	3	False	False	False	No
3936	1320	stanly481025	2	0	0	0	3	0	0	0	0	0	5	0	0	0	0	1	1366.5	1	0	0	False	False	False	False	False	3	False	False	False	No
332	1321	ewrgio43	3	0	0	0	3	0	0	0	0	0	6	0	0	0	0	0	14	2	0	1.06772e-06	True	False	False	False	False	4	False	False	False	Yes
1402	1322	abc224148351	249	0	0	0	255	0	0	0	0	0	504	0	0	0	0	3.32343	4342.23	1	0	4.1675e-06	False	False	False	False	False	3	False	False	False	No
2678	1323	jer0229	51	0.0784314	0	4	52	0	0.0769231	0.0769231	0	4	103	8	0.038835	0.0776699	8	3.1739	3275.12	1	0	0	False	False	False	False	False	3	False	False	False	No
3937	1324	star117end413	14	0.0714286	0	1	18	0	0.0555556	0.0555556	0	1	32	2	0.03125	0.0625	2	2.52206	2627.5	1	0	0	False	False	False	False	False	3	False	False	False	No
333	1325	ewrpyth	21	0.619048	13	0	3	0	0.666667	0.666667	2	0	24	15	0.541667	0.625	0	0	17	1	0	1.52274e-06	False	False	False	False	False	3	False	False	False	Yes
1403	1326	abc279406	1	0	0	0	25	0	0	0	0	0	26	0	0	0	0	0	670	2	5	2.0036e-07	True	False	False	False	False	3	False	False	False	No
2679	1327	jerome9102	352	0.0170455	2	4	367	0	0.013624	0.013624	3	2	719	11	0.00834492	0.015299	6	3.42532	4660.18	1	0	0	False	False	False	False	False	3	False	False	False	No
3938	1328	star19800112	20	0.2	0	4	21	0	0.190476	0.190476	0	4	41	8	0.097561	0.195122	8	2.55034	11428.7	1	0	0	False	False	False	False	False	3	False	False	False	No
334	1329	ewrrff	2	0	0	0	0	0	0	0	0	0	2	0	0	0	0	1	147	1	3	1.60288e-07	False	False	False	False	False	3	False	False	False	Yes
1404	1330	abc348004	20	0.05	1	0	21	0	0.047619	0.047619	1	0	41	2	0.0243902	0.0487805	0	2.68925	1877.13	1	0	0	False	False	False	False	False	3	False	False	False	No
2680	1331	jerry_1929	18	0.333333	0	6	24	0	0.291667	0.291667	0	7	42	13	0.142857	0.309524	13	1.84644	142.5	1	0	0	False	False	False	False	False	3	False	False	False	No
3939	1332	star7213681	4	0	0	0	5	0	0	0	0	0	9	0	0	0	0	0.918296	7327.67	1	0	0	False	False	False	False	False	3	False	False	False	No
335	1333	eygenx	3	1	3	0	1	0	0	0	0	0	4	3	0.75	0.75	0	0	0	0	0	0	False	False	False	False	False	0	False	False	False	Yes
1405	1334	abc355051	12	0	0	0	48	0	0.3125	0.3125	0	15	60	15	0	0.25	15	2.66353	5056.45	2	0	5.31089e-06	True	False	False	False	False	4	False	False	False	No
2681	1335	jerry09265	80	0.0125	0	1	75	0	0.0133333	0.0133333	0	1	155	2	0.00645161	0.0129032	2	3.18198	2705.96	1	0	0	False	False	False	False	False	3	False	False	False	No
3940	1336	star8509012	32	0	0	0	36	0	0	0	0	0	68	0	0	0	0	3.12452	7825.75	1	0	0	False	False	False	False	False	3	False	False	False	No
336	1337	eyking	1	0	0	0	0	0	0	0	0	0	1	0	0	0	0	0	14	1	0	0	False	False	False	False	False	3	False	False	False	Yes
1406	1338	abc41kn31	2	0	0	0	3	0	0	0	0	0	5	0	0	0	0	0	12291	1	0	0	False	False	False	False	False	3	False	False	False	No
2682	1339	jerrytpi	203	0.0197044	4	0	206	0	0.0242718	0.0242718	5	0	409	9	0.00977995	0.0220049	0	3.21834	3200.95	1	0	0	False	False	False	False	False	3	False	False	False	No
3941	1340	starok2000	14	0	0	0	18	0	0	0	0	0	32	0	0	0	0	2.79248	10094.9	1	0	0	False	False	False	False	False	3	False	False	False	No
337	1341	eyun0908	3	0	0	0	3	0	0	0	0	0	6	0	0	0	0	1	249.5	1	4	8.01442e-08	False	False	False	False	False	3	False	False	False	Yes
1407	1342	abc475082	4	0	0	0	5	0	0	0	0	0	9	0	0	0	0	0	4876	1	0	0	False	False	False	False	False	3	False	False	False	No
2683	1343	jerryxsara	8	0	0	0	13	0	0	0	0	0	21	0	0	0	0	2.23593	2719	1	0	0	False	False	False	False	False	3	False	False	False	No
3942	1344	starsharptaiwan	734	0.0912807	67	0	953	0	0.0776495	0.0776495	74	0	1687	141	0.0397155	0.0835803	0	1.82258	91.3092	1	0	0	False	False	False	False	False	3	False	False	False	No
338	1345	f026315	1	0	0	0	0	0	0	0	0	0	1	0	0	0	0	0	1	1	0	0	False	False	False	False	False	3	False	False	False	Yes
1409	1346	abc620317	52	0	0	0	51	0	0	0	0	0	103	0	0	0	0	3.32519	5354.33	1	1	0	False	False	False	False	False	0	False	False	False	No
2684	1347	jet3402004	13	0	0	0	12	0	0	0	0	0	25	0	0	0	0	2.66353	7620.82	1	0	0	False	False	False	False	False	3	False	False	False	No
3943	1348	stateman5916	1395	0.0172043	8	16	1392	0	0.0172414	0.0172414	8	16	2787	48	0.00861141	0.0172228	32	3.25498	2500.25	2	0	2.27966e-05	True	False	False	False	False	4	False	False	False	No
339	1349	f11cq8m5	10	0.6	6	0	2	0	0.5	0.5	1	0	12	7	0.5	0.583333	0	0	6.33333	1	5	5.61009e-07	False	False	False	False	False	3	False	False	False	Yes
1410	1350	abc6520	103	0	0	0	108	0	0	0	0	0	211	0	0	0	0	3.18262	9429.61	1	0	0	False	False	False	False	False	3	False	False	False	No
2685	1351	jhains	52	0	0	0	54	0	0	0	0	0	106	0	0	0	0	2.99243	3033.44	1	0	0	False	False	False	False	False	3	False	False	False	No
3944	1352	std2727088450	2	0	0	0	3	0	0	0	0	0	5	0	0	0	0	1	438	1	0	0	False	False	False	False	False	3	False	False	False	No
340	1353	f34343	9	0.888889	8	0	24	0	0.958333	0.958333	23	0	33	31	0.242424	0.939394	0	0	9	1	0	0	False	False	False	False	False	3	False	False	False	Yes
1411	1354	abc7861771	54	0	0	0	51	0	0	0	0	0	105	0	0	0	0	3.24284	3448.73	1	0	0	False	False	False	False	False	3	False	False	False	No
2686	1355	jhchen731	23	0	0	0	21	0	0	0	0	0	44	0	0	0	0	2.53661	6535.94	1	0	0	False	False	False	False	False	3	False	False	False	No
3945	1356	stenmanqic	19	0.947368	0	18	59	0	0.898305	0.898305	0	53	78	71	0.230769	0.910256	71	0	5	1	3	1.60288e-07	False	False	False	False	False	3	False	False	False	No
341	1357	f41897489	8	0	0	0	0	0	0	0	0	0	8	0	0	0	0	0	16.5	1	4	8.01442e-08	False	False	False	False	False	0	False	False	False	Yes
1412	1358	abcd1233	101	0	0	0	102	0	0	0	0	0	203	0	0	0	0	3.02441	3336.06	1	0	0	False	False	False	False	False	3	False	False	False	No
2687	1359	jhgsdgjkl	8	0	0	0	8	0	0	0	0	0	16	0	0	0	0	0.918296	38	3	0	9.6173e-07	True	True	False	False	False	4	False	False	False	No
3946	1360	steve04171	114	0.0175439	0	2	116	0	0.0172414	0.0172414	0	2	230	4	0.00869565	0.0173913	4	2.97165	5924.36	1	0	0	False	False	False	False	False	3	False	False	False	No
342	1361	f426rb	8	0.125	1	0	0	0	0	0	0	0	8	1	0.125	0.125	0	0	30.3333	4	0	0.000225675	True	True	True	False	False	4	False	False	False	Yes
1413	1362	abcd520lkk	398	0.291457	74	42	424	0	0.301887	0.301887	86	42	822	244	0.141119	0.296837	84	3.16216	1663.23	1	0	0	False	False	False	False	False	3	False	False	False	No
2688	1363	ji31j4520	77	0.012987	0	1	77	0	0.012987	0.012987	0	1	154	2	0.00649351	0.012987	2	3.08594	4786.27	1	0	0	False	False	False	False	False	3	False	False	False	No
3947	1364	steve88	61	0.0491803	0	3	59	0	0.0508475	0.0508475	0	3	120	6	0.025	0.05	6	3.18567	1962.81	1	0	0	False	False	False	False	False	3	False	False	False	No
343	1365	f43435	32	0.21875	7	0	0	0	0	0	0	0	32	7	0.21875	0.21875	0	0	16.5	2	0	5.34295e-08	True	False	False	False	False	4	False	False	False	Yes
1414	1366	abcd556647	35	0	0	0	20	0	0	0	0	0	55	0	0	0	0	2.88178	3061.82	1	0	0	False	False	False	False	False	3	False	False	False	No
2689	1367	ji3ul4bp4g4	1	0	0	0	2	0	0	0	0	0	3	0	0	0	0	0	196	1	0	0	False	False	False	False	False	3	False	False	False	No
3948	1368	steven30330	7	0	0	0	7	0	0	0	0	0	14	0	0	0	0	2.12809	1753.29	1	0	0	False	False	False	False	False	3	False	False	False	No
344	1369	f45454f	1	0	0	0	1	0	0	0	0	0	2	0	0	0	0	0	9	1	0	0	False	False	False	False	False	3	False	False	False	Yes
1415	1370	abcd79910	4	0	0	0	5	0	0	0	0	0	9	0	0	0	0	1.5	195.5	1	0	0	False	False	False	False	False	3	False	False	False	No
2690	1371	jia159753	3	0	0	0	4	0	0	0	0	0	7	0	0	0	0	0.918296	1274.67	1	0	0	False	False	False	False	False	3	False	False	False	No
3949	1372	stevenyang1974	2775	0.0814414	226	0	4390	0	0.0740319	0.0740319	325	0	7165	551	0.0315422	0.0769016	0	1.5521	70.0117	1	0	0	False	False	False	False	False	3	False	False	False	No
345	1373	f4tk8sy4	18	0.777778	14	0	8	0	0.75	0.75	6	0	26	20	0.538462	0.769231	0	1	80.25	1	8.14286	6.49168e-06	False	False	False	False	False	3	False	False	False	Yes
1416	1374	abcd88041	55	0	0	0	54	0	0	0	0	0	109	0	0	0	0	3.07085	7969.37	1	0	0	False	False	False	False	False	3	False	False	False	No
2691	1375	jianlizeng	11	0	0	0	10	0	0	0	0	0	21	0	0	0	0	2.41938	1556	1	0	0	False	False	False	False	False	3	False	False	False	No
3950	1376	stewpuma	143	0	0	0	146	0	0	0	0	0	289	0	0	0	0	3.17748	2521.81	1	0	0	False	False	False	False	False	3	False	False	False	No
346	1377	f578ym1	3	0	0	0	0	0	0	0	0	0	3	0	0	0	0	0	13	1	0	0	False	False	False	False	False	3	False	False	False	Yes
1417	1378	abcdefg3621	1	0	0	0	34	0	0.852941	0.852941	0	29	35	29	0	0.828571	29	0	14434	2	0	1.33574e-06	True	False	False	False	False	4	False	False	False	No
2692	1379	jianungs	15	0	0	0	16	0	0	0	0	0	31	0	0	0	0	2.6645	4836.86	1	0	0	False	False	False	False	False	3	False	False	False	No
3951	1380	stilemiss	1	0	0	0	6	0	0	0	0	0	7	0	0	0	0	0	5654	1	8	2.28411e-05	False	False	False	False	False	3	False	False	False	No
347	1381	f5960236	115	0.713043	82	0	0	0	0	0	0	0	115	82	0.713043	0.713043	0	0	11.5556	2	18.325	6.86569e-06	True	False	False	False	False	4	False	False	False	Yes
1418	1382	abdc000123	7	0	0	0	22	0	0.0454545	0.0454545	0	1	29	1	0	0.0344828	1	1	43.5	3	0	8.44732e-06	True	True	False	False	False	4	False	False	False	No
2693	1383	jigaiejogji	1	0	0	0	1	0	0	0	0	0	2	0	0	0	0	0	998	1	0	0	False	False	False	False	False	3	False	False	False	No
3952	1384	stingray	912	0.176535	49	112	882	0	0.124717	0.124717	52	58	1794	271	0.0897436	0.151059	170	2.83252	807.401	1	0	0	False	False	False	False	False	3	False	False	False	No
348	1385	f7s8syqm	5	0	0	0	0	0	0	0	0	0	5	0	0	0	0	0	15.6	4	0	6.89641e-05	True	True	True	False	False	4	False	False	False	Yes
1419	1386	abel9192	457	0.0109409	0	5	470	0	0.0106383	0.0106383	0	5	927	10	0.00539374	0.0107875	10	3.15154	4509.02	1	0	0	False	False	False	False	False	3	False	False	False	No
2694	1387	jikey05	7	0	0	0	6	0	0	0	0	0	13	0	0	0	0	2.23593	12586.6	1	0	0	False	False	False	False	False	3	False	False	False	No
3953	1388	stone1114	42	0.0238095	0	1	49	0	0.0204082	0.0204082	0	1	91	2	0.010989	0.021978	2	3.27661	4278.46	1	0	0	False	False	False	False	False	3	False	False	False	No
349	1389	farsc8549	71	0.211268	15	0	153	0	0.111111	0.111111	17	0	224	32	0.0669643	0.142857	0	2.11808	261.091	2	18.5238	0.000101222	True	False	False	False	False	4	False	False	False	Yes
1420	1390	ablin123	3	0	0	0	1	0	0	0	0	0	4	0	0	0	0	0	1258	1	0	0	False	False	False	False	False	3	False	False	False	No
2695	1391	jill86202	16	0	0	0	16	0	0	0	0	0	32	0	0	0	0	2.85539	3055.92	1	0	0	False	False	False	False	False	3	False	False	False	No
3954	1392	stoneku	561	0.00356506	0	2	572	0	0.00524476	0.00524476	0	3	1133	5	0.00176523	0.00441306	5	3.21417	2131.08	1	0	0	False	False	False	False	False	3	False	False	False	No
350	1393	fbzswgjit13	1	0	0	0	0	0	0	0	0	0	1	0	0	0	0	0	11	1	1	0	False	False	False	False	False	0	False	False	False	Yes
1421	1394	abo1138	857	0.0431739	21	16	862	0	0.0591647	0.0591647	29	22	1719	88	0.0215241	0.0511926	38	3.25548	2311.15	1	0	0	False	False	False	False	False	3	False	False	False	No
2696	1395	jillbatr	136	0.0294118	4	0	149	0	0.0872483	0.0872483	13	0	285	17	0.0140351	0.0596491	0	3.29736	3055.97	1	0	0	False	False	False	False	False	3	False	False	False	No
3955	1396	story6452	5	0	0	0	6	0	0	0	0	0	11	0	0	0	0	1.5	7450.75	1	0	0	False	False	False	False	False	3	False	False	False	No
351	1397	fd3434	2	0	0	0	0	0	0	0	0	0	2	0	0	0	0	0	7.5	2	0	2.67147e-08	True	False	False	False	False	4	False	False	False	Yes
1422	1398	abod0129	197	0.00507614	1	0	205	0	0.00487805	0.00487805	1	0	402	2	0.00248756	0.00497512	0	3.25468	5089.42	1	0	0	False	False	False	False	False	3	False	False	False	No
2697	1399	jim3651143	9	0	0	0	10	0	0	0	0	0	19	0	0	0	0	2.40564	4106.38	1	0	0	False	False	False	False	False	3	False	False	False	No
3956	1400	stovermeis	15	0.8	0	12	49	0	0.897959	0.897959	0	44	64	56	0.1875	0.875	56	0	8	1	1	0	False	False	False	False	False	0	False	False	False	No
352	1401	fd445454	4	0	0	0	11	0	0	0	0	0	15	0	0	0	0	0	13.75	1	8	4.80865e-07	False	False	False	False	False	3	False	False	False	Yes
1423	1402	abrt	4	0	0	0	5	0	0	0	0	0	9	0	0	0	0	1.5	837.5	1	0	0	False	False	False	False	False	3	False	False	False	No
2698	1403	jimk90006	14	0	0	0	9	0	0	0	0	0	23	0	0	0	0	2.69951	5716.5	1	0	0	False	False	False	False	False	3	False	False	False	No
3957	1404	stronghsu	89	0.11236	5	5	93	0	0.129032	0.129032	6	6	182	22	0.0549451	0.120879	11	3.40231	3764.58	1	0	0	False	False	False	False	False	3	False	False	False	No
353	1405	fd545	1	1	1	0	0	0	0	0	0	0	1	1	1	1	0	0	0	0	0	0	False	False	False	False	False	0	False	False	False	Yes
1424	1406	abyss1216	2	0	0	0	8	0	0	0	0	0	10	0	0	0	0	1	77.5	1	0	0	False	False	False	False	False	3	False	False	False	No
2699	1407	jimmy19player	153	0.0261438	0	4	123	0	0.0243902	0.0243902	0	3	276	7	0.0144928	0.0253623	7	3.15147	3081.48	1	0	0	False	False	False	False	False	3	False	False	False	No
3958	1408	stu88037	1	0	0	0	2	0	0	0	0	0	3	0	0	0	0	0	26	1	0	0	False	False	False	False	False	3	False	False	False	No
354	1409	fdf43	8	0.5	1	3	6	0	0.833333	0.833333	1	4	14	9	0.285714	0.642857	7	0	6	2	7.45455	1.40252e-06	True	False	False	False	False	4	False	False	False	Yes
1425	1410	ac1519665	45	0.0888889	1	3	45	0	0.0444444	0.0444444	1	1	90	6	0.0444444	0.0666667	4	2.79335	5646.47	1	0	0	False	False	False	False	False	3	False	False	False	No
2700	1411	jimmy3738	35	0	0	0	33	0	0	0	0	0	68	0	0	0	0	3.03064	7218	1	0	0	False	False	False	False	False	3	False	False	False	No
3959	1412	stu97350	29	0	0	0	41	0	0	0	0	0	70	0	0	0	0	2.65564	5553.44	1	0	0	False	False	False	False	False	3	False	False	False	No
355	1413	fdg43gd	2	0.5	1	0	1	0	1	1	1	0	3	2	0.333333	0.666667	0	0	9	1	1	0	False	False	False	False	False	0	False	False	False	Yes
1426	1414	ac19860221	52	0	0	0	53	0	0	0	0	0	105	0	0	0	0	2.64125	3716.77	1	0	0	False	False	False	False	False	3	False	False	False	No
2701	1415	jimmyhwok	1249	0.0040032	0	5	253	0	0.0869565	0.0869565	0	22	1502	27	0.00332889	0.017976	27	3.14024	1731.97	1	0	0	False	False	False	False	False	3	False	False	False	No
3960	1416	style_love0902	23	0	0	0	17	0	0	0	0	0	40	0	0	0	0	2.68402	3460.14	1	1	0	False	False	False	False	False	0	False	False	False	No
356	1417	fdhfdjgffg	25	1	25	0	26	0	0.961538	0.961538	25	0	51	50	0.490196	0.980392	0	0	0	0	0	0	False	False	False	False	False	0	False	False	False	Yes
1427	1418	account9043259	19	0	0	0	8	0	0	0	0	0	27	0	0	0	0	2.42258	1489.13	1	0	0	False	False	False	False	False	3	False	False	False	No
2702	1419	jin-671029	209	0	0	0	121	0	0	0	0	0	330	0	0	0	0	3.20135	3598.8	1	0	0	False	False	False	False	False	3	False	False	False	No
3961	1420	su0831	3	0	0	0	2	0	0	0	0	0	5	0	0	0	0	1.58496	664.667	1	1	0	False	False	False	False	False	0	False	False	False	No
357	1421	fdhfjgk	1	0	0	0	1	0	0	0	0	0	2	0	0	0	0	0	58	1	1	0	False	False	False	False	False	0	False	False	False	Yes
1428	1422	accxcel	6	0	0	0	6	0	0	0	0	0	12	0	0	0	0	1.92193	1423.4	1	0	0	False	False	False	False	False	3	False	False	False	No
2703	1423	jin19970810	10	0	0	0	10	0	0	0	0	0	20	0	0	0	0	2.23593	1962.14	1	0	0	False	False	False	False	False	3	False	False	False	No
3962	1424	subanyo_2526	78	0.025641	2	0	83	0	0.0240964	0.0240964	2	0	161	4	0.0124224	0.0248447	0	3.19119	1967.96	1	0	0	False	False	False	False	False	3	False	False	False	No
358	1425	fdhjdet	13	0	0	0	3	0	0	0	0	0	16	0	0	0	0	1.29879	121.5	1	16.0667	6.1711e-06	False	False	False	False	False	3	False	False	False	Yes
1429	1426	ace12549	2	0.5	0	1	7	0	0	0	0	0	9	1	0.111111	0.111111	1	0	782	1	0	0	False	False	False	False	False	3	False	False	False	No
2704	1427	jin386531	225	0.0133333	2	1	233	0	0.0171674	0.0171674	3	1	458	7	0.00655022	0.0152838	2	3.21289	2381.57	1	0	0	False	False	False	False	False	3	False	False	False	No
3963	1428	sucalai	146	0	0	0	110	0	0.00909091	0.00909091	1	0	256	1	0	0.00390625	0	3.1714	1914.28	1	0	0	False	False	False	False	False	3	False	False	False	No
359	1429	fdjhfgjfgjfgj	1	1	1	0	0	0	0	0	0	0	1	1	1	1	0	0	0	0	0	0	False	False	False	False	False	0	False	False	False	Yes
1430	1430	achaotw	9	0	0	0	8	0	0	0	0	0	17	0	0	0	0	2.72548	1099.11	1	0	0	False	False	False	False	False	3	False	False	False	No
2705	1431	jing_587	40	0	0	0	36	0	0	0	0	0	76	0	0	0	0	2.7719	6805	1	0	0	False	False	False	False	False	3	False	False	False	No
3964	1432	suchihhung	8	0	0	0	7	0	0	0	0	0	15	0	0	0	0	2.52164	1692	1	0	0	False	False	False	False	False	3	False	False	False	No
360	1433	fdkffkd	4	0	0	0	4	0	0	0	0	0	8	0	0	0	0	0.918296	34	1	6	2.40433e-07	False	False	False	False	False	3	False	False	False	Yes
1431	1434	achilles188	30	0	0	0	34	0	0	0	0	0	64	0	0	0	0	3.17095	4203.25	1	0	0	False	False	False	False	False	3	False	False	False	No
2706	1435	jinn96501	37	0.432432	0	16	36	0	0.416667	0.416667	0	15	73	31	0.219178	0.424658	31	2.69478	4393.16	1	0	0	False	False	False	False	False	3	False	False	False	No
3965	1436	suhui3345427	343	0	0	0	362	0	0	0	0	0	705	0	0	0	0	3.18928	1810.64	1	0	0	False	False	False	False	False	3	False	False	False	No
361	1437	fdlknhdlfkjh	1	0	0	0	0	0	0	0	0	0	1	0	0	0	0	0	32	1	1	0	False	False	False	False	False	0	False	False	False	Yes
1432	1438	achun	83	0	0	0	77	0	0	0	0	0	160	0	0	0	0	3.16881	1923.62	1	0	0	False	False	False	False	False	3	False	False	False	No
2707	1439	jiro3321	23	0	0	0	21	0	0	0	0	0	44	0	0	0	0	2.7899	6448.73	1	0	0	False	False	False	False	False	3	False	False	False	No
3966	1440	sumeikai	2	0	0	0	2	0	0	0	0	0	4	0	0	0	0	1	71	1	0	0	False	False	False	False	False	3	False	False	False	No
362	1441	fdsaehgdrhed	4	1	4	0	0	0	0	0	0	0	4	4	1	1	0	0	0	0	0	0	False	False	False	False	False	0	False	False	False	Yes
1433	1442	actyon8960	7	0	0	0	7	0	0	0	0	0	14	0	0	0	0	1.58496	662	1	0	0	False	False	False	False	False	3	False	False	False	No
2708	1443	jiu84	68	0.0294118	0	2	73	0	0.0410959	0.0410959	0	3	141	5	0.0141844	0.035461	5	3.20359	5137.54	1	0	0	False	False	False	False	False	3	False	False	False	No
3967	1444	summer99601	14	0.0714286	0	1	8	0	0	0	0	0	22	1	0.0454545	0.0454545	1	2.64644	5991.5	1	0	0	False	False	False	False	False	3	False	False	False	No
363	1445	fdsagfdsg	18	0	0	0	17	0	0	0	0	0	35	0	0	0	0	0	15	1	8	4.80865e-07	False	False	False	False	False	3	False	False	False	Yes
1434	1446	acvbn84	47	0.851064	0	40	76	0	0.815789	0.815789	0	62	123	102	0.325203	0.829268	102	1.45915	63.6667	1	0	0	False	False	False	False	False	3	False	False	False	No
2709	1447	jj4949371120	5	0	0	0	7	0	0	0	0	0	12	0	0	0	0	2.32193	2300.2	1	0	0	False	False	False	False	False	3	False	False	False	No
3968	1448	sun294g	1	0	0	0	2	0	0	0	0	0	3	0	0	0	0	0	8600	1	0	0	False	False	False	False	False	3	False	False	False	No
364	1449	fdsaghewhg	14	0.571429	8	0	0	0	0	0	0	0	14	8	0.571429	0.571429	0	0	1	1	0	0	False	False	False	False	False	0	False	False	False	Yes
1435	1450	ad1911208	294	0.0136054	4	0	306	0	0.0163399	0.0163399	5	0	600	9	0.00666667	0.015	0	2.8823	601.976	1	0	0	False	False	False	False	False	3	False	False	False	No
2710	1451	jj870817tw	16	0	0	0	17	0	0	0	0	0	33	0	0	0	0	2.92193	4475.7	1	0	0	False	False	False	False	False	3	False	False	False	No
3969	1452	sun3535daisy	364	0	0	0	349	0	0	0	0	0	713	0	0	0	0	2.87165	2992.96	1	0	0	False	False	False	False	False	3	False	False	False	No
365	1453	fdsahesh	1	0	0	0	0	0	0	0	0	0	1	0	0	0	0	0	107	1	1	0	False	False	False	False	False	0	False	False	False	Yes
1436	1454	ad7013sf	68	0.264706	1	17	72	0	0.25	0.25	1	17	140	36	0.128571	0.257143	34	3.20372	7073.9	1	0	0	False	False	False	False	False	3	False	False	False	No
2711	1455	jjames1912tw	22	0	0	0	20	0	0	0	0	0	42	0	0	0	0	2.48068	2634.17	1	0	0	False	False	False	False	False	3	False	False	False	No
3970	1456	sunny1226	3	0	0	0	3	0	0	0	0	0	6	0	0	0	0	1.58496	2895	1	0	0	False	False	False	False	False	3	False	False	False	No
366	1457	fdsahewh	6	0	0	0	0	0	0	0	0	0	6	0	0	0	0	0	19	2	0	1.91774e-07	True	False	False	False	False	4	False	False	False	Yes
1437	1458	adamtsao	4	0	0	0	5	0	0	0	0	0	9	0	0	0	0	0	281.333	1	0	0	False	False	False	False	False	3	False	False	False	No
2712	1459	jjhata	70	0.0571429	4	0	74	0	0.0540541	0.0540541	4	0	144	8	0.0277778	0.0555556	0	2.4074	925.604	1	0	0	False	False	False	False	False	3	False	False	False	No
3972	1460	sunny850226	1	0	0	0	1	0	0	0	0	0	2	0	0	0	0	0	18	1	0	0	False	False	False	False	False	3	False	False	False	No
367	1461	fdsahfd	1	1	1	0	1	0	1	1	1	0	2	2	0.5	1	0	0	0	0	0	0	False	False	False	False	False	0	False	False	False	Yes
1438	1462	adcpt	370	0.0297297	7	4	378	0	0.042328	0.042328	12	4	748	27	0.0147059	0.0360963	8	3.24657	2512.51	1	0	0	False	False	False	False	False	3	False	False	False	No
2713	1463	jjhs0827	72	0.0138889	1	0	73	0	0.0136986	0.0136986	1	0	145	2	0.00689655	0.0137931	0	3.33298	6212.63	1	0	0	False	False	False	False	False	3	False	False	False	No
3973	1464	sunsk	25	0.04	0	1	21	0	0.047619	0.047619	0	1	46	2	0.0217391	0.0434783	2	2.52494	3557.44	1	1	0	False	False	False	False	False	0	False	False	False	No
368	1465	fdsahgshsd	7	0	0	0	5	0	0	0	0	0	12	0	0	0	0	0	11	2	0	1.01716e-05	True	False	False	False	False	4	False	False	False	Yes
1439	1466	addie19961005	7	0	0	0	3	0	0	0	0	0	10	0	0	0	0	2.52164	3035.14	1	0	0	False	False	False	False	False	3	False	False	False	No
2714	1467	jjj100china	2	0	0	0	4	0	0.25	0.25	0	1	6	1	0	0.166667	1	1	874.5	1	0	0	False	False	False	False	False	3	False	False	False	No
3974	1468	super820	1	0	0	0	2	0	0	0	0	0	3	0	0	0	0	0	2645	1	0	0	False	False	False	False	False	3	False	False	False	No
369	1469	fdshftrdjytr	1	0	0	0	1	0	0	0	0	0	2	0	0	0	0	0	2	1	1	0	False	False	False	False	False	0	False	False	False	Yes
1440	1470	addison3623	1	0	0	0	1	0	0	0	0	0	2	0	0	0	0	0	18	1	0	0	False	False	False	False	False	3	False	False	False	No
2715	1471	jjj1234521	30	0	0	0	26	0	0	0	0	0	56	0	0	0	0	2.88888	2745.28	1	0	0	False	False	False	False	False	3	False	False	False	No
3975	1472	superbox320	11	0	0	0	9	0	0	0	0	0	20	0	0	0	0	2.64644	3587.2	1	0	0	False	False	False	False	False	3	False	False	False	No
370	1473	fdshgtdrshd	4	0	0	0	0	0	0	0	0	0	4	0	0	0	0	0	11.25	2	6.98522	7.74269e-06	True	False	False	False	False	4	False	False	False	Yes
1441	1474	addle901ow	1	0	0	0	6	0	0	0	0	0	7	0	0	0	0	0	9341	1	0	0	False	False	False	False	False	3	False	False	False	No
2716	1475	jjj2573641	5	0	0	0	6	0	0	0	0	0	11	0	0	0	0	0.918296	2040.33	1	0	0	False	False	False	False	False	3	False	False	False	No
3976	1476	superman_lee	9	0.222222	2	0	11	0	0.181818	0.181818	2	0	20	4	0.1	0.2	0	1.9183	172.167	1	0	0	False	False	False	False	False	3	False	False	False	No
371	1477	fdshrehtew	1	1	1	0	0	0	0	0	0	0	1	1	1	1	0	0	0	0	0	0	False	False	False	False	False	0	False	False	False	Yes
1442	1478	adidas841003	2	0	0	0	4	0	0	0	0	0	6	0	0	0	0	1	16552	1	0	0	False	False	False	False	False	3	False	False	False	No
2717	1479	jjjiiimmmyyytw	68	0.0147059	0	1	77	0	0	0	0	0	145	1	0.00689655	0.00689655	1	2.79759	9075.28	1	0	0	False	False	False	False	False	3	False	False	False	No
3977	1480	supermillman	4	0	0	0	18	0	0	0	0	0	22	0	0	0	0	0	25.5	1	0	0	False	False	False	False	False	3	False	False	False	No
372	1481	feuifkrgtrh	16	1	16	0	1	0	0	0	0	0	17	16	0.941176	0.941176	0	0	0	0	0	0	False	False	False	False	False	0	False	False	False	Yes
1443	1482	adiroyder1594	27	0.037037	1	0	29	0	0.0344828	0.0344828	1	0	56	2	0.0178571	0.0357143	0	2.55327	705.16	1	0	0	False	False	False	False	False	3	False	False	False	No
2718	1483	jjjs93112	4	0.25	0	1	8	0	0	0	0	0	12	1	0.0833333	0.0833333	1	0.918296	8078	1	0	0	False	False	False	False	False	3	False	False	False	No
3978	1484	superrabbit3	17	0	0	0	15	0	0	0	0	0	32	0	0	0	0	3.05656	4459.07	1	0	0	False	False	False	False	False	3	False	False	False	No
373	1485	ffdgas	11	0	0	0	0	0	0	0	0	0	11	0	0	0	0	0	2.5	2	14	1.48267e-06	True	False	False	False	False	3	False	False	False	Yes
1444	1486	adpeter04	4	0	0	0	4	0	0	0	0	0	8	0	0	0	0	2	5645	1	0	0	False	False	False	False	False	3	False	False	False	No
2719	1487	jjoy670670	1	0	0	0	1	0	0	0	0	0	2	0	0	0	0	0	169	1	0	0	False	False	False	False	False	3	False	False	False	No
3979	1488	superstar5062	18	0	0	0	15	0	0.0666667	0.0666667	0	1	33	1	0	0.030303	1	2.3496	2047.38	1	0	0	False	False	False	False	False	3	False	False	False	No
374	1489	ffmbjlfez707	5	0	0	0	4	0	0	0	0	0	9	0	0	0	0	0	7.2	1	11	1.4426e-06	False	False	False	False	False	3	False	False	False	Yes
1445	1490	ae860711	25	0.44	0	11	27	0	0.407407	0.407407	0	11	52	22	0.211538	0.423077	22	2.34585	8358.77	2	0	0.00459467	True	False	False	False	False	3	False	False	False	No
2720	1491	jjtim	6	0.5	0	3	5	0	0.6	0.6	0	3	11	6	0.272727	0.545455	6	1.58496	329.333	1	0	0	False	False	False	False	False	3	False	False	False	No
3980	1492	supertlor	13	0	0	0	11	0	0	0	0	0	24	0	0	0	0	2.66123	2181.08	1	1	0	False	False	False	False	False	0	False	False	False	No
375	1493	fg4455	12	0.833333	0	10	12	0	0.75	0.75	0	9	24	19	0.416667	0.791667	19	0	7	1	3	1.00982e-05	False	False	False	False	False	3	False	False	False	Yes
1446	1494	aecs1283	7	0	0	0	6	0	0	0	0	0	13	0	0	0	0	2.58496	4816.17	1	0	0	False	False	False	False	False	3	False	False	False	No
2721	1495	jjy7090	156	0	0	0	159	0	0	0	0	0	315	0	0	0	0	2.84329	4396.13	1	0	0	False	False	False	False	False	3	False	False	False	No
3981	1496	supertoy49	110	0	0	0	116	0	0	0	0	0	226	0	0	0	0	3.20465	2764.77	1	0	0	False	False	False	False	False	3	False	False	False	No
376	1497	fgdge	11	0.363636	4	0	7	0	0.285714	0.285714	1	1	18	6	0.222222	0.333333	1	0.591673	24.2857	2	14.5455	2.84512e-06	True	False	False	False	False	4	False	False	False	Yes
1447	1498	aeeaee123	1	0	0	0	2	0	0	0	0	0	3	0	0	0	0	0	2686	1	0	0	False	False	False	False	False	3	False	False	False	No
2722	1499	jk012413	10	0.1	0	1	4	0	0	0	0	0	14	1	0.0714286	0.0714286	1	2.25163	1973	1	0	0	False	False	False	False	False	3	False	False	False	No
3982	1500	superxyz15	21	0	0	0	16	0	0	0	0	0	37	0	0	0	0	2.86032	5385.84	1	0	0	False	False	False	False	False	3	False	False	False	No
377	1501	fgfg54	3	0	0	0	0	0	0	0	0	0	3	0	0	0	0	0.918296	69.3333	1	5.4	2.64476e-06	False	False	False	False	False	3	False	False	False	Yes
1448	1502	afterstory	105	0.0285714	0	3	110	0	0.0272727	0.0272727	1	2	215	6	0.0139535	0.027907	5	3.20637	3213.57	1	0	0	False	False	False	False	False	3	False	False	False	No
2723	1503	jk5225	28	0	0	0	23	0	0	0	0	0	51	0	0	0	0	2.93988	1475.19	1	0	0	False	False	False	False	False	3	False	False	False	No
3983	1504	superyngo	70	0	0	0	73	0	0	0	0	0	143	0	0	0	0	3.26194	5144.2	1	0	0	False	False	False	False	False	3	False	False	False	No
378	1505	fgfhg4	8	0	0	0	7	0	0	0	0	0	15	0	0	0	0	0.811278	35.75	1	8	4.80865e-07	False	False	False	False	False	3	False	False	False	Yes
1449	1506	afu7186	512	0.00585938	0	3	522	0	0.00574713	0.00574713	0	3	1034	6	0.00290135	0.00580271	6	3.21712	1882.19	1	0	0	False	False	False	False	False	3	False	False	False	No
2724	1507	jkds1227	47	0	0	0	48	0	0	0	0	0	95	0	0	0	0	3.25671	4744.85	1	0	0	False	False	False	False	False	3	False	False	False	No
3984	1508	susyuan	1	0	0	0	1	0	0	0	0	0	2	0	0	0	0	0	48	1	0	0	False	False	False	False	False	3	False	False	False	No
379	1509	fgghg4	22	0.0454545	1	0	61	0	0.0983607	0.0983607	6	0	83	7	0.0120482	0.0843373	0	1.5	89.25	1	8	4.80865e-07	False	False	False	False	False	3	False	False	False	Yes
1450	1510	agheigyei	3	0	0	0	4	0	0	0	0	0	7	0	0	0	0	0	12	1	0	0	False	False	False	False	False	3	False	False	False	No
2725	1511	jkds34f	2	0	0	0	3	0	0	0	0	0	5	0	0	0	0	0	11	1	0	0	False	False	False	False	False	3	False	False	False	No
3985	1512	sutaylang168	3	0.333333	0	1	4	0	0.25	0.25	0	1	7	2	0.142857	0.285714	2	1	4062.5	1	0	0	False	False	False	False	False	3	False	False	False	No
380	1513	fghghh4	33	0.363636	2	10	37	0	0.324324	0.324324	2	10	70	24	0.171429	0.342857	20	0.650022	94.6667	2	12	4.72851e-06	True	False	False	False	False	4	False	False	False	Yes
1451	1514	agnisy	32	0	0	0	38	0	0	0	0	0	70	0	0	0	0	2.05459	3322.67	1	0	0	False	False	False	False	False	3	False	False	False	No
2726	1515	jkgsdjgkl	7	0	0	0	5	0	0	0	0	0	12	0	0	0	0	0.918296	38	3	0	9.6173e-07	True	True	False	False	False	4	False	False	False	No
3986	1516	sverne1930	126	0	0	0	134	0	0	0	0	0	260	0	0	0	0	2.96714	6562.6	1	0	0	False	False	False	False	False	3	False	False	False	No
381	1517	fghiluy	6	0	0	0	6	0	0	0	0	0	12	0	0	0	0	0	9.66667	2	0	1.05911e-06	True	False	False	False	False	4	False	False	False	Yes
1452	1518	ahan3762	51	0.0784314	4	0	56	0	0.125	0.125	4	3	107	11	0.0373832	0.102804	3	2.52611	2739.86	1	0	0	False	False	False	False	False	3	False	False	False	No
2727	1519	jkgsdlkgjl	7	0	0	0	9	0	0	0	0	0	16	0	0	0	0	0.918296	38	3	0	9.6173e-07	True	True	False	False	False	4	False	False	False	No
3987	1520	sw010803	18	0	0	0	21	0	0.047619	0.047619	1	0	39	1	0	0.025641	0	3.03856	2443.61	1	0	0	False	False	False	False	False	3	False	False	False	No
382	1521	fgjfgkhll	1	0	0	0	1	0	0	0	0	0	2	0	0	0	0	0	4	1	0	0	False	False	False	False	False	3	False	False	False	Yes
1453	1522	ahcan0422	1	0	0	0	1	0	0	0	0	0	2	0	0	0	0	0	3705	1	0	0	False	False	False	False	False	3	False	False	False	No
2729	1523	jkl0904	72	0	0	0	77	0	0	0	0	0	149	0	0	0	0	3.08841	1863.11	1	0	0	False	False	False	False	False	3	False	False	False	No
3988	1524	sweethome1968	8	0	0	0	8	0	0	0	0	0	16	0	0	0	0	0	19	1	0	0	False	False	False	False	False	3	False	False	False	No
383	1525	fgjfgkkg	1	0	0	0	0	0	0	0	0	0	1	0	0	0	0	0	16	1	1	0	False	False	False	False	False	0	False	False	False	Yes
1454	1526	ahhooa2	13	0	0	0	13	0	0	0	0	0	26	0	0	0	0	2.41938	912.889	1	0	0	False	False	False	False	False	3	False	False	False	No
2730	1527	jkyip14789	15	0	0	0	18	0	0	0	0	0	33	0	0	0	0	2.13394	9635.31	1	0	0	False	False	False	False	False	3	False	False	False	No
3989	1528	sweetlong0913	157	0.0191083	0	3	160	0	0.0125	0.0125	0	2	317	5	0.00946372	0.0157729	5	3.09994	2325.43	1	0	0	False	False	False	False	False	3	False	False	False	No
384	1529	fgjfgkl	1	1	1	0	0	0	0	0	0	0	1	1	1	1	0	0	0	0	0	0	False	False	False	False	False	0	False	False	False	Yes
1455	1530	ahhshay	42	0.047619	0	2	29	0	0	0	0	0	71	2	0.028169	0.028169	2	2.954	12198.2	1	0	0	False	False	False	False	False	3	False	False	False	No
2731	1531	jles95678	2	0	0	0	3	0	0	0	0	0	5	0	0	0	0	1	3875	1	0	0	False	False	False	False	False	3	False	False	False	No
3990	1532	swen0703	192	0.0833333	16	0	192	0	0.0833333	0.0833333	16	0	384	32	0.0416667	0.0833333	0	3.0941	1485.06	1	0	0	False	False	False	False	False	3	False	False	False	No
385	1533	fgjytkyu	2	1	2	0	0	0	0	0	0	0	2	2	1	1	0	0	0	0	0	0	False	False	False	False	False	0	False	False	False	Yes
1456	1534	ai3t86v	21	0	0	0	21	0	0	0	0	0	42	0	0	0	0	2.75343	2321.21	1	0	0	False	False	False	False	False	3	False	False	False	No
2732	1535	jlkuo56	244	0.00409836	0	1	254	0	0.00393701	0.00393701	0	1	498	2	0.00200803	0.00401606	2	3.19574	2208.8	1	0	0	False	False	False	False	False	3	False	False	False	No
3991	1536	sy2es1214	1	0	0	0	1	0	0	0	0	0	2	0	0	0	0	0	9	1	0	0	False	False	False	False	False	3	False	False	False	No
386	1537	fgkjfhlghl	26	0.884615	23	0	28	0	0.714286	0.714286	20	0	54	43	0.425926	0.796296	0	0.918296	25.3333	1	6	2.40433e-07	False	False	False	False	False	3	False	False	False	Yes
1457	1538	aia581003	95	0	0	0	96	0	0	0	0	0	191	0	0	0	0	2.99175	4207.65	1	0	0	False	False	False	False	False	3	False	False	False	No
2733	1539	jmps8335	1	0	0	0	15	0	0.133333	0.133333	0	2	16	2	0	0.125	2	0	964	2	0	2.36002e-06	True	False	False	False	False	4	False	False	False	No
3992	1540	sym8088s	106	0	0	0	94	0	0	0	0	0	200	0	0	0	0	3.07889	3229.49	2	0	4.96894e-05	True	False	False	False	False	4	False	False	False	No
387	1541	fgqwe	2	0.5	1	0	0	0	0	0	0	0	2	1	0.5	0.5	0	0	136	1	0	0	False	False	False	False	False	3	False	False	False	Yes
1458	1542	aikiahigh	12	0	0	0	12	0	0	0	0	0	24	0	0	0	0	2.68872	1597.58	1	0	0	False	False	False	False	False	3	False	False	False	No
2734	1543	joe-fet	180	0.00555556	1	0	187	0	0.0106952	0.0106952	2	0	367	3	0.0027248	0.00817439	0	3.19944	2339.19	1	1	0	False	False	False	False	False	0	False	False	False	No
3993	1544	t00087186	24	0	0	0	27	0	0	0	0	0	51	0	0	0	0	2.52164	1035.14	2	0	0.000220178	True	False	False	False	False	4	False	False	False	No
388	1545	fhdjkdj	72	0.0555556	4	0	100	0	0.06	0.06	6	0	172	10	0.0232558	0.0581395	0	1.7605	72.9231	1	26	6.25125e-06	False	False	False	False	False	3	False	False	False	Yes
1459	1546	airforce736	27	0.0740741	2	0	28	0	0.0714286	0.0714286	2	0	55	4	0.0363636	0.0727273	0	2.954	3880.14	1	0	0	False	False	False	False	False	3	False	False	False	No
2735	1547	joe1225	32	0	0	0	33	0	0	0	0	0	65	0	0	0	0	2.87291	4521	1	0	0	False	False	False	False	False	3	False	False	False	No
3994	1548	t00095815	21	0.047619	0	1	19	0	0.0526316	0.0526316	0	1	40	2	0.025	0.05	2	2.5048	3038.26	1	1	0	False	False	False	False	False	0	False	False	False	No
389	1549	fhds7889800	13	0.0769231	1	0	0	0	0	0	0	0	13	1	0.0769231	0.0769231	0	0.503258	28.3333	4	0	0.000707623	True	True	True	False	False	4	False	False	False	Yes
1460	1550	airwolf_wong	215	0	0	0	225	0	0	0	0	0	440	0	0	0	0	3.23356	2841.25	1	0	0	False	False	False	False	False	3	False	False	False	No
2736	1551	joe87331	7	0	0	0	8	0	0	0	0	0	15	0	0	0	0	0.918296	14915	1	0	0	False	False	False	False	False	3	False	False	False	No
3995	1552	t0229911059	28	0	0	0	30	0	0	0	0	0	58	0	0	0	0	2.72029	1648.19	1	0	0	False	False	False	False	False	3	False	False	False	No
390	1553	fhds8d6	3	1	3	0	0	0	0	0	0	0	3	3	1	1	0	0	0	0	0	0	False	False	False	False	False	0	False	False	False	Yes
1461	1554	aj0820	184	0	0	0	187	0	0	0	0	0	371	0	0	0	0	3.09206	1156.7	1	0	0	False	False	False	False	False	3	False	False	False	No
2737	1555	joen201009100	15	0.133333	0	2	10	0	0	0	0	0	25	2	0.08	0.08	2	2.62581	2039.08	1	0	0	False	False	False	False	False	3	False	False	False	No
3996	1556	t0310429	5	0	0	0	4	0	0	0	0	0	9	0	0	0	0	1.92193	3536	1	1	0	False	False	False	False	False	0	False	False	False	No
391	1557	fhfhlkjhoh	9	0	0	0	0	0	0	0	0	0	9	0	0	0	0	0.811278	38	1	8	4.80865e-07	False	False	False	False	False	3	False	False	False	Yes
1462	1558	ajaxc	14	0.0714286	0	1	13	0	0.0769231	0.0769231	0	1	27	2	0.037037	0.0740741	2	3.0958	5232.45	1	0	0	False	False	False	False	False	3	False	False	False	No
2738	1559	john880129	25	0	0	0	22	0	0.0454545	0.0454545	0	1	47	1	0	0.0212766	1	1.52193	6310.2	2	0	0.000112535	True	False	False	False	False	3	False	False	False	No
3997	1560	t0314	17	0.235294	0	4	5	0	0	0	0	0	22	4	0.181818	0.181818	4	2.48171	7162.27	1	0	0	False	False	False	False	False	3	False	False	False	No
392	1561	fhght	1	0	0	0	1	0	0	0	0	0	2	0	0	0	0	0	8	1	1	0	False	False	False	False	False	0	False	False	False	Yes
1463	1562	ajoe0726	52	0.0576923	0	3	57	0	0.0526316	0.0526316	0	3	109	6	0.0275229	0.0550459	6	2.59019	851.161	1	1	0	False	False	False	False	False	0	False	False	False	No
2739	1563	johnny7665	14	0.0714286	0	1	14	0	0.0714286	0.0714286	0	1	28	2	0.0357143	0.0714286	2	2.87314	1839.38	1	0	0	False	False	False	False	False	3	False	False	False	No
3998	1564	t0324189	39	0.025641	1	0	46	0	0.0217391	0.0217391	1	0	85	2	0.0117647	0.0235294	0	2.96345	4700.52	1	0	0	False	False	False	False	False	3	False	False	False	No
393	1565	fhsda76fuy	3	0	0	0	3	0	0	0	0	0	6	0	0	0	0	0	17	2	0	1.60288e-07	True	False	False	False	False	4	False	False	False	Yes
1464	1566	ak072200	2	0	0	0	3	0	0	0	0	0	5	0	0	0	0	0	489.5	1	0	0	False	False	False	False	False	3	False	False	False	No
2740	1567	johnnybmw	9	0	0	0	9	0	0	0	0	0	18	0	0	0	0	2.11328	6393.78	1	0	0	False	False	False	False	False	3	False	False	False	No
4000	1568	t08639274	136	0.0514706	7	0	149	0	0.0604027	0.0604027	9	0	285	16	0.0245614	0.0561404	0	3.30318	3601.42	1	0	0	False	False	False	False	False	3	False	False	False	No
394	1569	fieldh	10	0.9	9	0	0	0	0	0	0	0	10	9	0.9	0.9	0	0	6	1	1	0	False	False	False	False	False	0	False	False	False	Yes
1465	1570	ak4750r	2	0	0	0	3	0	0	0	0	0	5	0	0	0	0	1	23505.5	1	0	0	False	False	False	False	False	3	False	False	False	No
2741	1571	johnnygu	72	0.0416667	0	3	63	0	0.031746	0.031746	0	2	135	5	0.0222222	0.037037	5	2.88953	8219.78	1	0	0	False	False	False	False	False	3	False	False	False	No
4001	1572	t0929101283	13	0	0	0	11	0	0	0	0	0	24	0	0	0	0	2.55034	858	1	0	0	False	False	False	False	False	3	False	False	False	No
395	1573	fiofj312	10	0	0	0	3	0	0	0	0	0	13	0	0	0	0	0	9.7	1	20	3.60649e-06	False	False	False	False	False	3	False	False	False	Yes
1466	1574	akani1801	158	0.873418	0	138	166	0	0.879518	0.879518	0	146	324	284	0.425926	0.876543	284	2.81507	2354.15	1	0	0	False	False	False	False	False	3	False	False	False	No
2742	1575	johnyeh49	194	0.0309278	6	0	205	0	0.0341463	0.0341463	7	0	399	13	0.0150376	0.0325815	0	3.25271	2644.27	1	0	0	False	False	False	False	False	3	False	False	False	No
4002	1576	t0938029676	23	0.0434783	0	1	26	0	0.0384615	0.0384615	0	1	49	2	0.0204082	0.0408163	2	2.94639	7579.86	1	0	3.70266e-05	False	False	False	False	False	3	False	False	False	No
396	1577	fkfvydomo436	3	0	0	0	0	0	0	0	0	0	3	0	0	0	0	0	25	1	1	0	False	False	False	False	False	0	False	False	False	Yes
1467	1578	aki11111	29	0	0	0	33	0	0	0	0	0	62	0	0	0	0	2.99663	3796.7	1	0	0	False	False	False	False	False	3	False	False	False	No
2743	1579	jojo701030	13	0	0	0	13	0	0	0	0	0	26	0	0	0	0	1.92193	13318.6	1	0	0	False	False	False	False	False	3	False	False	False	No
4003	1580	t121416	28	0	0	0	40	0	0	0	0	0	68	0	0	0	0	2.94145	3521.6	1	0	0	False	False	False	False	False	0	False	False	False	No
397	1581	fkjadghdsjk	8	0.125	1	0	4	0	0	0	0	0	12	1	0.0833333	0.0833333	0	0	5.66667	1	11.4444	0.000197956	False	False	False	False	False	3	False	False	False	Yes
1468	1582	akiracast	531	0.118644	34	29	563	0	0.120782	0.120782	34	34	1094	131	0.0575868	0.119744	63	3.26885	2806.2	1	0	0	False	False	False	False	False	3	False	False	False	No
2744	1583	jojostarking	41	0	0	0	33	0	0	0	0	0	74	0	0	0	0	3.23555	4816.46	1	0	0	False	False	False	False	False	3	False	False	False	No
4004	1584	t122276069	50	0	0	0	43	0	0	0	0	0	93	0	0	0	0	3.23693	4652.59	1	0	0	False	False	False	False	False	3	False	False	False	No
398	1585	fkjhgklj	7	1	7	0	1	0	0	0	0	0	8	7	0.875	0.875	0	0	0	0	0	0	False	False	False	False	False	0	False	False	False	Yes
1469	1586	akiyama0319	120	0.05	1	5	126	0	0.047619	0.047619	1	5	246	12	0.0243902	0.0487805	10	3.38916	5694.41	1	0	0	False	False	False	False	False	3	False	False	False	No
2745	1587	jojowang99	3	0	0	0	4	0	0	0	0	0	7	0	0	0	0	0	64736	1	0	0	False	False	False	False	False	3	False	False	False	No
4005	1588	t124128888	2	0	0	0	2	0	0	0	0	0	4	0	0	0	0	1	4323.5	1	0	0	False	False	False	False	False	3	False	False	False	No
399	1589	fkjsdghk	3	0	0	0	0	0	0	0	0	0	3	0	0	0	0	0	1	1	1	0	False	False	False	False	False	0	False	False	False	Yes
1470	1590	akosharon	1	0	0	0	2	0	0	0	0	0	3	0	0	0	0	0	260	1	0	0	False	False	False	False	False	3	False	False	False	No
2746	1591	jolina11722	25	0.08	0	2	34	0	0	0	0	0	59	2	0.0338983	0.0338983	2	2.45083	7440.5	1	0	0	False	False	False	False	False	3	False	False	False	No
4006	1592	t1913135	11	0	0	0	11	0	0	0	0	0	22	0	0	0	0	2.64644	1510	1	0	0	False	False	False	False	False	3	False	False	False	No
400	1593	fksjadghkdjgl	1	1	1	0	0	0	0	0	0	0	1	1	1	1	0	0	0	0	0	0	False	False	False	False	False	0	False	False	False	Yes
1471	1594	al02035245	60	0	0	0	52	0	0	0	0	0	112	0	0	0	0	3.19347	5778.46	1	0	0	False	False	False	False	False	3	False	False	False	No
2747	1595	jolinsay124	199	0.180905	22	14	158	0	0.14557	0.14557	10	13	357	59	0.10084	0.165266	27	3.2951	3195.43	1	0	0	False	False	False	False	False	3	False	False	False	No
4007	1596	t27ina	67	0	0	0	69	0	0	0	0	0	136	0	0	0	0	2.6365	8640.45	1	0	0	False	False	False	False	False	3	False	False	False	No
401	1597	fkuns	26	0	0	0	1	0	0	0	0	0	27	0	0	0	0	0	3.88889	1	36.0909	3.67862e-05	False	False	False	False	False	3	False	False	False	Yes
1472	1598	al50223	15	0	0	0	17	0	0	0	0	0	32	0	0	0	0	2.82258	5936	1	0	0	False	False	False	False	False	3	False	False	False	No
2748	1599	jonneyku	288	0	0	0	283	0	0	0	0	0	571	0	0	0	0	3.10344	1866.04	1	0	0	False	False	False	False	False	3	False	False	False	No
4008	1600	t3311010	73	0.0273973	0	2	71	0	0.0140845	0.0140845	0	1	144	3	0.0138889	0.0208333	3	3.03189	2148.36	1	0	0	False	False	False	False	False	3	False	False	False	No
402	1601	fobkinpub553	28	0	0	0	27	0	0.222222	0.222222	6	0	55	6	0	0.109091	0	0.413817	18.25	3	24.9001	6.30416e-05	True	True	False	False	False	4	False	False	False	Yes
1473	1602	alancool619062	18	0	0	0	9	0	0	0	0	0	27	0	0	0	0	2.45282	5612.25	1	1	0	False	False	False	False	False	0	False	False	False	No
2749	1603	jordanjack	7	0	0	0	7	0	0	0	0	0	14	0	0	0	0	2.52164	12216.9	1	0	0	False	False	False	False	False	3	False	False	False	No
4009	1604	t456654g	1334	0.0877061	84	33	1437	0	0.0848991	0.0848991	91	31	2771	239	0.042223	0.0862505	64	3.30911	2685.92	1	0	0	False	False	False	False	False	3	False	False	False	No
403	1605	foeschzheny	1	0	0	0	0	0	0	0	0	0	1	0	0	0	0	0	228	1	1	0	False	False	False	False	False	0	False	False	False	Yes
1474	1606	alanli	29	0.275862	0	8	27	0	0.259259	0.259259	0	7	56	15	0.142857	0.267857	15	2.86558	2128.11	1	0	0	False	False	False	False	False	3	False	False	False	No
2750	1607	jorkinlen	202	0.039604	8	0	215	0	0.0372093	0.0372093	8	0	417	16	0.0191847	0.0383693	0	3.34557	3801.16	1	0	0	False	False	False	False	False	3	False	False	False	No
4010	1608	t4lin1	9	0.222222	0	2	10	0	0.3	0.3	0	3	19	5	0.105263	0.263158	5	2.58496	4243	1	0	0	False	False	False	False	False	3	False	False	False	No
404	1609	foxy0222	82	0.0243902	0	2	70	0	0.0571429	0.0571429	0	4	152	6	0.0131579	0.0394737	6	1.95021	2040.57	7	0	3.6675e-07	True	True	True	True	True	4	False	False	False	Yes
1475	1610	alanwu0710	439	0.0341686	3	12	137	0	0.0364964	0.0364964	3	2	576	20	0.0260417	0.0347222	14	3.19996	2053.13	1	0	0	False	False	False	False	False	3	False	False	False	No
2751	1611	joryime	1	0	0	0	5	0	0.4	0.4	0	2	6	2	0	0.333333	2	0	9205	1	0	0	False	False	False	False	False	3	False	False	False	No
4011	1612	t5790236	106	0	0	0	91	0	0	0	0	0	197	0	0	0	0	3.17409	3618.68	1	0	0	False	False	False	False	False	3	False	False	False	No
405	1613	frankslia	2	0	0	0	1	0	0	0	0	0	3	0	0	0	0	1	477.5	1	3	6.64395e-05	False	False	False	False	False	3	False	False	False	Yes
1476	1614	albatrossz	14	0.214286	0	3	14	0	0.214286	0.214286	0	3	28	6	0.107143	0.214286	6	2.25	10928.1	1	0	0	False	False	False	False	False	3	False	False	False	No
2752	1615	joy004212	3	0	0	0	21	0	0.047619	0.047619	0	1	24	1	0	0.0416667	1	0.918296	1028.33	1	0	0	False	False	False	False	False	3	False	False	False	No
4012	1616	t66396639	24	0	0	0	26	0	0	0	0	0	50	0	0	0	0	1.85539	2280.33	1	0	0	False	False	False	False	False	3	False	False	False	No
406	1617	frascobin	12	0.75	9	0	7	0	0.571429	0.571429	4	0	19	13	0.473684	0.684211	0	0.918296	37.6667	1	0	1.60288e-06	False	False	False	False	False	3	False	False	False	Yes
1477	1618	alc23457	26	0	0	0	30	0	0	0	0	0	56	0	0	0	0	2.76596	2036.8	1	0	0	False	False	False	False	False	3	False	False	False	No
2753	1619	joy168lin	3	0.333333	0	1	3	0	0.333333	0.333333	0	1	6	2	0.166667	0.333333	2	0	117	1	0	0	False	False	False	False	False	3	False	False	False	No
4013	1620	t8894v56	36	0	0	0	17	0	0	0	0	0	53	0	0	0	0	3.26259	6284.96	1	0	0	False	False	False	False	False	3	False	False	False	No
407	1621	frassoyaogo	3	0	0	0	3	0	0	0	0	0	6	0	0	0	0	0	31	1	6	2.40433e-07	False	False	False	False	False	3	False	False	False	Yes
1478	1622	alexchan19770	225	0.0311111	7	0	233	0	0.0343348	0.0343348	8	0	458	15	0.0152838	0.0327511	0	3.16245	1754.74	1	0	0	False	False	False	False	False	3	False	False	False	No
2754	1623	joy350951	13	0	0	0	12	0	0	0	0	0	25	0	0	0	0	2.58496	5963.5	1	0	0	False	False	False	False	False	3	False	False	False	No
4014	1624	t896523	10	0	0	0	32	0	0	0	0	0	42	0	0	0	0	1.36165	5973	2	0	7.1065e-06	True	False	False	False	False	4	False	False	False	No
408	1625	fsd67uy	2	1	2	0	0	0	0	0	0	0	2	2	1	1	0	0	0	0	0	0	False	False	False	False	False	0	False	False	False	Yes
1479	1626	alice0408	67	0	0	0	36	0	0	0	0	0	103	0	0	0	0	2.35319	2559.79	1	0	0	False	False	False	False	False	3	False	False	False	No
2755	1627	joy92777	16	0.0625	0	1	26	0	0.0769231	0.0769231	0	2	42	3	0.0238095	0.0714286	3	2.75	1373	1	0	0	False	False	False	False	False	3	False	False	False	No
4015	1628	t982008221	2	0	0	0	3	0	0	0	0	0	5	0	0	0	0	1	527.5	1	0	0	False	False	False	False	False	3	False	False	False	No
409	1629	fsdfd4	1	0	0	0	0	0	0	0	0	0	1	0	0	0	0	0	11	1	1	0	False	False	False	False	False	0	False	False	False	Yes
1480	1630	alice246800	4	0	0	0	62	0	0.629032	0.629032	0	39	66	39	0	0.590909	39	1.5	883.5	2	0	2.0036e-07	True	False	False	False	False	4	False	False	False	No
2756	1631	joyce_8395	68	0.0147059	1	0	71	0	0.0140845	0.0140845	1	0	139	2	0.00719424	0.0143885	0	2.9121	1224.7	1	0	0	False	False	False	False	False	3	False	False	False	No
4016	1632	t985026	22	0.136364	0	3	25	0	0.08	0.08	0	2	47	5	0.0638298	0.106383	5	2.24857	10031.6	1	0	0	False	False	False	False	False	3	False	False	False	No
410	1633	fsdfsdf234	87	0	0	0	56	0	0	0	0	0	143	0	0	0	0	0.777601	36.1429	3	114.314	0.00012161	True	True	False	False	False	4	False	False	False	Yes
1481	1634	alice364	2078	0.100577	207	2	2876	0	0.10153	0.10153	290	2	4954	501	0.0421881	0.10113	4	1.58993	99.4768	1	0	0	False	False	False	False	False	3	False	False	False	No
2757	1635	joyce860220	31	0	0	0	27	0	0	0	0	0	58	0	0	0	0	2.3983	7867.52	1	1	0	False	False	False	False	False	0	False	False	False	No
4017	1636	ta2011xxl	14	0	0	0	13	0	0	0	0	0	27	0	0	0	0	2.05881	2527.56	1	0	0	False	False	False	False	False	3	False	False	False	No
411	1637	fsfgfg	10	0.9	0	9	29	0	0.931034	0.931034	0	27	39	36	0.230769	0.923077	36	0	10	1	1	0	False	False	False	False	False	3	False	False	False	Yes
1482	1638	alice85051911	1	0	0	0	1	0	0	0	0	0	2	0	0	0	0	0	2251	1	0	0	False	False	False	False	False	3	False	False	False	No
2758	1639	joysu9145	161	0	0	0	161	0	0	0	0	0	322	0	0	0	0	3.20184	2905.09	1	0	0	False	False	False	False	False	3	False	False	False	No
4018	1640	taco_612	2081	0.00432484	0	9	2139	0	0.00420757	0.00420757	0	9	4220	18	0.0021327	0.0042654	18	3.29561	3016.67	1	0	0	False	False	False	False	False	3	False	False	False	No
412	1641	ftgjp43	2	0	0	0	0	0	0	0	0	0	2	0	0	0	0	1	63.5	1	4	8.01442e-08	False	False	False	False	False	3	False	False	False	Yes
1483	1642	alice880512	56	0	0	0	77	0	0	0	0	0	133	0	0	0	0	3.34406	4592.78	1	0	0	False	False	False	False	False	3	False	False	False	No
2759	1643	jp5569	123	0.130081	15	1	133	0	0.150376	0.150376	19	1	256	36	0.0625	0.140625	2	2.95438	1339.6	1	0	0	False	False	False	False	False	3	False	False	False	No
4019	1644	taco90150	8	0	0	0	11	0	0	0	0	0	19	0	0	0	0	1.9183	7886.5	1	0	0	False	False	False	False	False	3	False	False	False	No
413	1645	ftgjyhkk	99	0.989899	0	98	35	0	1	1	0	35	134	133	0.731343	0.992537	133	0	289	1	0	0	False	False	False	False	False	3	False	False	False	Yes
1484	1646	alingin	108	0	0	0	111	0	0	0	0	0	219	0	0	0	0	3.2261	5663.46	1	0	0	False	False	False	False	False	3	False	False	False	No
2760	1647	jqbdfpoat32	10	0	0	0	13	0	0	0	0	0	23	0	0	0	0	0	8.5	1	0	2.40433e-07	False	False	False	False	False	3	False	False	False	No
4020	1648	taipeiry	52	0.153846	0	8	52	0	0.153846	0.153846	0	8	104	16	0.0769231	0.153846	16	1.89106	699	1	0	0	False	False	False	False	False	3	False	False	False	No
414	1649	ftwec	10	0.1	1	0	2	0	0.5	0.5	1	0	12	2	0.0833333	0.166667	0	0	12	1	8	4.80865e-07	False	False	False	False	False	3	False	False	False	Yes
1485	1650	alio_yan	36	0	0	0	37	0	0	0	0	0	73	0	0	0	0	2.98009	1066.88	1	1	0	False	False	False	False	False	0	False	False	False	No
2761	1651	jr141074	1	0	0	0	1	0	0	0	0	0	2	0	0	0	0	0	14	1	0	0	False	False	False	False	False	3	False	False	False	No
4021	1652	takai814qq	14	0.285714	0	4	16	0	0.5	0.5	0	8	30	12	0.133333	0.4	12	1.9183	4302.83	1	0	0	False	False	False	False	False	3	False	False	False	No
415	1653	fubi0	12	0	0	0	10	0	0.1	0.1	1	0	22	1	0	0.0454545	0	1.24067	39.5455	1	21.2933	9.97795e-05	False	False	False	False	False	3	False	False	False	Yes
1486	1654	allanhsiao	20	0.05	0	1	13	0	0	0	0	0	33	1	0.030303	0.030303	1	2.65656	2100.27	1	0	0	False	False	False	False	False	3	False	False	False	No
2762	1655	jryulin	2	0	0	0	2	0	0	0	0	0	4	0	0	0	0	1	667	1	0	0	False	False	False	False	False	3	False	False	False	No
4022	1656	tallsun	44	0.0909091	0	4	51	0	0.117647	0.117647	0	6	95	10	0.0421053	0.105263	10	2.94474	1763.34	1	0	0	False	False	False	False	False	3	False	False	False	No
416	1657	fubi030	3	0.333333	0	1	0	0	0	0	0	0	3	1	0.333333	0.333333	1	0	10.5	1	3	6.64395e-05	False	False	False	False	False	3	False	False	False	Yes
1487	1658	allen09852146	11	0	0	0	11	0	0.0909091	0.0909091	0	1	22	1	0	0.0454545	1	2.24644	4430.5	1	0	0	False	False	False	False	False	3	False	False	False	No
2763	1659	js0619x	92	0	0	0	86	0	0	0	0	0	178	0	0	0	0	3.16111	3885.52	1	0	0	False	False	False	False	False	3	False	False	False	No
4023	1660	tania168	28	0	0	0	33	0	0	0	0	0	61	0	0	0	0	2.68872	4478.42	1	0	0	False	False	False	False	False	3	False	False	False	No
417	1661	fubi0309	2	0	0	0	1	0	0	0	0	0	3	0	0	0	0	1	41.5	1	0	2.24404e-06	False	False	False	False	False	3	False	False	False	Yes
1488	1662	allen811202	20	0.05	0	1	21	0	0.047619	0.047619	0	1	41	2	0.0243902	0.0487805	2	3.08506	7745.62	1	0	0	False	False	False	False	False	3	False	False	False	No
2764	1663	jsdf87sdiuf	12	0	0	0	32	0	0	0	0	0	44	0	0	0	0	1.82501	149.417	3	0	8.35111e-07	True	True	False	False	False	4	False	False	False	No
4024	1664	tank520007	14	0.5	0	7	15	0	0.466667	0.466667	0	7	29	14	0.241379	0.482759	14	1.92193	3712.8	1	0	0	False	False	False	False	False	3	False	False	False	No
418	1665	fv45345	16	1	0	16	18	0	1	1	0	18	34	34	0.470588	1	34	0	0	0	0	0	False	False	False	False	False	0	False	False	False	Yes
1489	1666	alltceol	529	0.0661626	25	10	578	0	0.0640138	0.0640138	27	10	1107	72	0.031617	0.0650407	20	2.56684	1284.19	1	0	0	False	False	False	False	False	3	False	False	False	No
2765	1667	jses8852	17	0.0588235	0	1	18	0	0.0555556	0.0555556	0	1	35	2	0.0285714	0.0571429	2	2.875	5499.88	1	0	0	False	False	False	False	False	3	False	False	False	No
4025	1668	tasty1203	1	0	0	0	7	0	0	0	0	0	8	0	0	0	0	0	569	1	0	0	False	False	False	False	False	3	False	False	False	No
419	1669	g2y12b2q	10	0	0	0	0	0	0	0	0	0	10	0	0	0	0	0	14.5714	4	0	0.000245132	True	True	True	False	False	4	False	False	False	Yes
1490	1670	almighty0110	29	0.0344828	0	1	31	0	0.0322581	0.0322581	0	1	60	2	0.0166667	0.0333333	2	2.99741	3740.76	1	0	0	False	False	False	False	False	3	False	False	False	No
2766	1671	jsk223	108	0	0	0	121	0	0	0	0	0	229	0	0	0	0	2.75506	6351.79	1	0	0	False	False	False	False	False	3	False	False	False	No
4026	1672	tasyborshyang	6	0	0	0	2	0	0	0	0	0	8	0	0	0	0	1.5	28994.8	1	0	0	False	False	False	False	False	3	False	False	False	No
420	1673	g48654121	1	0	0	0	0	0	0	0	0	0	1	0	0	0	0	0	13	1	0	0	False	False	False	False	False	3	False	False	False	Yes
1491	1674	altermemory1102	5	0	0	0	3	0	0	0	0	0	8	0	0	0	0	2	2568	1	1	0	False	False	False	False	False	0	False	False	False	No
2767	1675	jtodat	57	0	0	0	35	0	0	0	0	0	92	0	0	0	0	2.79633	6221.26	1	0	0	False	False	False	False	False	3	False	False	False	No
4027	1676	tata9985	59	0.0508475	1	2	58	0	0.0689655	0.0689655	1	3	117	7	0.025641	0.0598291	5	3.32521	4028.96	1	0	0	False	False	False	False	False	3	False	False	False	No
421	1677	g48978151	1	0	0	0	0	0	0	0	0	0	1	0	0	0	0	0	18	1	1	0	False	False	False	False	False	0	False	False	False	Yes
1492	1678	am03yyh	26	0	0	0	24	0	0	0	0	0	50	0	0	0	0	3.12075	3488.35	1	0	0	False	False	False	False	False	3	False	False	False	No
2768	1679	jtr556633	24	0.0833333	0	2	26	0	0.0769231	0.0769231	0	2	50	4	0.04	0.08	4	2.98233	4782.29	1	0	0	False	False	False	False	False	3	False	False	False	No
4028	1680	tatsuyatwothree	18	0.333333	1	5	20	0	0.3	0.3	1	5	38	12	0.157895	0.315789	10	2.32193	2080.4	1	1	0	False	False	False	False	False	0	False	False	False	No
422	1681	g72r19s5	2	0.5	1	0	0	0	0	0	0	0	2	1	0.5	0.5	0	0	42	1	1	0	False	False	False	False	False	0	False	False	False	Yes
1493	1682	amanda20070630	19	0	0	0	17	0	0	0	0	0	36	0	0	0	0	2.95021	7905.57	1	0	0	False	False	False	False	False	3	False	False	False	No
2769	1683	jtu0226	9	0	0	0	10	0	0	0	0	0	19	0	0	0	0	2.5	599.5	1	0	0	False	False	False	False	False	3	False	False	False	No
4029	1684	tb038626	12	0	0	0	13	0	0	0	0	0	25	0	0	0	0	2.12193	1213	1	0	0	False	False	False	False	False	3	False	False	False	No
423	1685	gallermeis	5	1	5	0	0	0	0	0	0	0	5	5	1	1	0	0	0	0	0	0	False	False	False	False	False	0	False	False	False	Yes
1494	1686	amandao52	38	0.0526316	0	2	41	0	0.0487805	0.0487805	0	2	79	4	0.0253165	0.0506329	4	3.18743	2907.73	1	0	0	False	False	False	False	False	3	False	False	False	No
2770	1687	jude0510	6234	0.0784408	489	0	7812	0	0.0750128	0.0750128	586	0	14046	1075	0.0348142	0.0765342	0	1.83673	103.463	1	0	0	False	False	False	False	False	3	False	False	False	No
4030	1688	tb070490	9	0	0	0	10	0	0	0	0	0	19	0	0	0	0	1	12866.5	1	0	0	False	False	False	False	False	3	False	False	False	No
424	1689	garfield888	1	0	0	0	1	0	0	0	0	0	2	0	0	0	0	0	1881	1	0	0	False	False	False	False	False	3	False	False	False	Yes
1495	1690	amat1786	5337	0.0768222	410	0	5830	0	0.0783877	0.0783877	457	0	11167	867	0.0367153	0.0776395	0	2.06194	125.489	1	0	4.1675e-06	False	False	False	False	False	3	False	False	False	No
2771	1691	juins	2	0	0	0	3	0	0	0	0	0	5	0	0	0	0	0	128	1	0	0	False	False	False	False	False	3	False	False	False	No
4031	1692	tb40w	69	0.057971	0	4	74	0	0.0540541	0.0540541	0	4	143	8	0.027972	0.0559441	8	2.97415	1071.06	1	0	0	False	False	False	False	False	3	False	False	False	No
425	1693	gbcsinswz490	1	0	0	0	1	0	0	0	0	0	2	0	0	0	0	0	20	1	1	0	False	False	False	False	False	0	False	False	False	Yes
1496	1694	amine	9649	0.135869	1277	34	12326	0	0.131835	0.131835	1595	30	21975	2936	0.0596587	0.133606	64	1.97771	118.87	1	0	0	False	False	False	False	False	3	False	False	False	No
2772	1695	july784117	217	0	0	0	219	0	0	0	0	0	436	0	0	0	0	3.22821	2450.61	1	0	0	False	False	False	False	False	3	False	False	False	No
4032	1696	tbymmp	71	0.084507	6	0	73	0	0.0958904	0.0958904	7	0	144	13	0.0416667	0.0902778	0	2.9752	1470.42	1	0	0	False	False	False	False	False	3	False	False	False	No
426	1697	gbkhfjyjk	7	0	0	0	0	0	0	0	0	0	7	0	0	0	0	0	1	1	1	0	False	False	False	False	False	0	False	False	False	Yes
1497	1698	amiss088	10	0.2	0	2	10	0	0.2	0.2	0	2	20	4	0.1	0.2	4	2.5	4131.38	1	0	0	False	False	False	False	False	3	False	False	False	No
2773	1699	jun751130	257	0	0	0	219	0	0	0	0	0	476	0	0	0	0	3.2586	5659.03	1	0	0	False	False	False	False	False	3	False	False	False	No
4033	1700	tdd1111	44	0.0227273	0	1	46	0	0.0217391	0.0217391	0	1	90	2	0.0111111	0.0222222	2	2.83009	1778.46	1	0	0	False	False	False	False	False	3	False	False	False	No
427	1701	gdsdd	6	0	0	0	0	0	0	0	0	0	6	0	0	0	0	0.721928	21.4	2	9.51923	7.96366e-06	True	False	False	False	False	3	False	False	False	Yes
1498	1702	amizai	7	0	0	0	6	0	0	0	0	0	13	0	0	0	0	1.84237	155	1	0	0	False	False	False	False	False	3	False	False	False	No
2774	1703	junck	2	0	0	0	3	0	0	0	0	0	5	0	0	0	0	1	1966	1	1	0	False	False	False	False	False	0	False	False	False	No
4034	1704	teamrc	1166	0.182676	211	2	1339	0	0.170276	0.170276	225	3	2505	441	0.0850299	0.176048	5	2.80649	1191.69	1	0	0	False	False	False	False	False	3	False	False	False	No
428	1705	gerdb146	4	0	0	0	2	0	0	0	0	0	6	0	0	0	0	0	8	1	8	4.80865e-07	False	False	False	False	False	3	False	False	False	Yes
1499	1706	amt1346	13	0	0	0	13	0	0	0	0	0	26	0	0	0	0	3	2348.38	1	1	0	False	False	False	False	False	0	False	False	False	No
2775	1707	june931490	38	0	0	0	41	0	0	0	0	0	79	0	0	0	0	2.80687	5174.52	1	0	0	False	False	False	False	False	3	False	False	False	No
4035	1708	ted79411	1	0	0	0	1	0	0	0	0	0	2	0	0	0	0	0	13	1	0	0	False	False	False	False	False	3	False	False	False	No
429	1709	gerges	1	0	0	0	0	0	0	0	0	0	1	0	0	0	0	0	1	1	1	0	False	False	False	False	False	0	False	False	False	Yes
1500	1710	amy1198	1	0	0	0	2	0	0	0	0	0	3	0	0	0	0	0	33303	1	0	0	False	False	False	False	False	3	False	False	False	No
2776	1711	juneblue	25	0	0	0	27	0	0.037037	0.037037	1	0	52	1	0	0.0192308	0	3.24022	2801	1	0	0	False	False	False	False	False	3	False	False	False	No
4036	1712	telessy	10	0.1	0	1	12	0	0.0833333	0.0833333	0	1	22	2	0.0454545	0.0909091	2	2.5	6086.38	1	0	0	False	False	False	False	False	3	False	False	False	No
430	1713	gfbdgydgf	2	0	0	0	4	0	0	0	0	0	6	0	0	0	0	0	4	1	1	0	False	False	False	False	False	3	False	False	False	Yes
1501	1714	amy2310733	13	0.307692	0	4	12	0	0.0833333	0.0833333	0	1	25	5	0.16	0.2	5	2.15564	7644.5	1	0	0	False	False	False	False	False	3	False	False	False	No
2777	1715	jungchung16327	11	0	0	0	12	0	0	0	0	0	23	0	0	0	0	2.19716	4836.89	1	1	0	False	False	False	False	False	0	False	False	False	No
4037	1716	teletubbies_s	384	0.0494792	19	0	387	0	0.0542636	0.0542636	21	0	771	40	0.0246433	0.0518807	0	3.08531	2138.06	2	0	0.000158058	True	False	False	False	False	4	False	False	False	No
431	1717	gfdgf45	3	0	0	0	3	0	0	0	0	0	6	0	0	0	0	1	28.5	1	3	4.80865e-07	False	False	False	False	False	3	False	False	False	Yes
1502	1718	amy848271010	25	0	0	0	9	0	0	0	0	0	34	0	0	0	0	2.78064	2844.75	1	0	0	False	False	False	False	False	3	False	False	False	No
2778	1719	justasign	12	0	0	0	15	0	0	0	0	0	27	0	0	0	0	2.25163	1719.83	1	0	0	False	False	False	False	False	3	False	False	False	No
4038	1720	ten575	16	0	0	0	15	0	0	0	0	0	31	0	0	0	0	2.92323	2742	1	0	0	False	False	False	False	False	3	False	False	False	No
432	1721	gfdshgfd	15	0	0	0	5	0	0	0	0	0	20	0	0	0	0	0.991264	30.3077	3	36.926	0.000410791	True	True	False	False	False	3	False	False	False	Yes
1503	1722	amy92295164	1	0	0	0	1	0	0	0	0	0	2	0	0	0	0	0	1262	1	0	0	False	False	False	False	False	3	False	False	False	No
2779	1723	justin0955807188	1	0	0	0	1	0	0	0	0	0	2	0	0	0	0	0	147	1	0	0	False	False	False	False	False	3	False	False	False	No
4039	1724	tensh	184	0.119565	1	21	170	0	0.141176	0.141176	1	23	354	46	0.0621469	0.129944	44	3.17474	3441.25	1	0	0	False	False	False	False	False	3	False	False	False	No
433	1725	gfhjytr	1	0	0	0	0	0	0	0	0	0	1	0	0	0	0	0	13	1	0	0	False	False	False	False	False	3	False	False	False	Yes
1504	1726	amyamy860808	21	0	0	0	25	0	0	0	0	0	46	0	0	0	0	2	5996	1	0	0	False	False	False	False	False	3	False	False	False	No
2781	1727	jw_aten	20	0	0	0	19	0	0	0	0	0	39	0	0	0	0	3.05881	2912.39	1	0	0	False	False	False	False	False	3	False	False	False	No
4040	1728	terence0314	3	0	0	0	3	0	0	0	0	0	6	0	0	0	0	1.58496	2415.33	1	0	0	False	False	False	False	False	3	False	False	False	No
434	1729	gfseg	13	0	0	0	8	0	0	0	0	0	21	0	0	0	0	0	23.25	2	0	2.24127e-05	True	False	False	False	False	4	False	False	False	Yes
1505	1730	ananshi	2	0	0	0	2	0	0	0	0	0	4	0	0	0	0	1	2472.5	1	0	0	False	False	False	False	False	3	False	False	False	No
2782	1731	jww540930	3	0	0	0	2	0	0	0	0	0	5	0	0	0	0	1.58496	271	1	0	0	False	False	False	False	False	3	False	False	False	No
4041	1732	terry2000	315	0.0031746	0	1	320	0	0.003125	0.003125	0	1	635	2	0.0015748	0.00314961	2	3.09329	2030.88	1	0	0.000915567	False	False	False	False	False	3	False	False	False	No
435	1733	gfsrer	2	0	0	0	0	0	0	0	0	0	2	0	0	0	0	0	2	1	1	0	False	False	False	False	False	0	False	False	False	Yes
1506	1734	anda1013	4	0	0	0	3	0	0	0	0	0	7	0	0	0	0	2	1516	1	0	0	False	False	False	False	False	3	False	False	False	No
2783	1735	jyhwaywu	1	0	0	0	12	0	0.25	0.25	0	3	13	3	0	0.230769	3	0	11	1	0	0	False	False	False	False	False	3	False	False	False	No
4042	1736	terrychyang	93	0.0967742	9	0	99	0	0.111111	0.111111	11	0	192	20	0.046875	0.104167	0	2.94661	885.974	1	0	0	False	False	False	False	False	3	False	False	False	No
436	1737	ggf43	8	0	0	0	8	0	0	0	0	0	16	0	0	0	0	0	10.1667	3	0	6.99364e-06	True	True	False	False	False	6	True	True	False	Yes
1507	1738	andro456	7	0.142857	0	1	5	0	0.2	0.2	0	1	12	2	0.0833333	0.166667	2	1.79248	604.833	1	0	0	False	False	False	False	False	3	False	False	False	No
2784	1739	jykiytklt	7	0	0	0	41	0	0	0	0	0	48	0	0	0	0	1.44882	155.714	3	0	8.35111e-07	True	True	False	False	False	4	False	False	False	No
4043	1740	tesla	728	0.0398352	0	29	694	0	0.0417867	0.0417867	0	29	1422	58	0.0203938	0.0407876	58	3.30774	2827.44	1	0	0	False	False	False	False	False	3	False	False	False	No
437	1741	ggrcs8gx	53	0	0	0	0	0	0	0	0	0	53	0	0	0	0	0	1	2	0	8.41514e-07	True	False	False	False	False	4	False	False	False	Yes
1508	1742	andx0312	22	0.318182	0	7	23	0	0.347826	0.347826	0	8	45	15	0.155556	0.333333	15	2.39624	937.083	1	0	0	False	False	False	False	False	3	False	False	False	No
2786	1743	jyuuza	17	0	0	0	17	0	0	0	0	0	34	0	0	0	0	2.96892	4195.85	1	0	0	False	False	False	False	False	3	False	False	False	No
4044	1744	th12450	27	0	0	0	21	0	0	0	0	0	48	0	0	0	0	2.94644	6597.6	1	0	0	False	False	False	False	False	3	False	False	False	No
438	1745	gh234dfsd	9	0	0	0	0	0	0	0	0	0	9	0	0	0	0	0	1.875	2	16.8667	3.93508e-06	True	False	False	False	False	3	False	False	False	Yes
1509	1746	andy111750	10	0.1	0	1	4	0	0.5	0.5	0	2	14	3	0.0714286	0.214286	3	1.79248	11684.8	1	0	0	False	False	False	False	False	3	False	False	False	No
2787	1747	jzc88188	27	0.037037	0	1	27	0	0.037037	0.037037	0	1	54	2	0.0185185	0.037037	2	2.93604	1311.23	1	0	0	False	False	False	False	False	3	False	False	False	No
4045	1748	thealth_car	4063	0.153335	623	0	5306	0	0.140219	0.140219	744	0	9369	1367	0.0664959	0.145907	0	2.17402	145.924	1	0	0	False	False	False	False	False	3	False	False	False	No
439	1749	gheagubaoshu	5	0.6	3	0	0	0	0	0	0	0	5	3	0.6	0.6	0	0	15	1	0	0	False	False	False	False	False	3	False	False	False	Yes
1510	1750	andy3460g	207	0.0724638	3	12	208	0	0.0721154	0.0721154	3	12	415	30	0.0361446	0.0722892	24	3.20838	2927.37	1	0	0	False	False	False	False	False	3	False	False	False	No
2788	1751	k1632	12	0.0833333	0	1	12	0	0	0	0	0	24	1	0.0416667	0.0416667	1	2.25163	3656.33	1	0	0	False	False	False	False	False	3	False	False	False	No
4046	1752	therecats	4	0	0	0	4	0	0	0	0	0	8	0	0	0	0	1.5	5239.5	1	0	0	False	False	False	False	False	3	False	False	False	No
440	1753	ghkjhgll	1	0	0	0	0	0	0	0	0	0	1	0	0	0	0	0	34	1	1	0	False	False	False	False	False	0	False	False	False	Yes
1511	1754	andy3733	134	0.0149254	0	2	23	0	0	0	0	0	157	2	0.0127389	0.0127389	2	2.22219	6601.91	1	0	0	False	False	False	False	False	3	False	False	False	No
2789	1755	k2000764	4	0	0	0	4	0	0	0	0	0	8	0	0	0	0	0.918296	1630.33	1	0	0	False	False	False	False	False	3	False	False	False	No
4047	1756	thpss90271	2	0	0	0	4	0	0	0	0	0	6	0	0	0	0	1	5593.5	1	0	0	False	False	False	False	False	3	False	False	False	No
441	1757	ghryh	24	0.0416667	1	0	24	0	0.0416667	0.0416667	1	0	48	2	0.0208333	0.0416667	0	0.845351	33.5455	3	28.099	6.48045e-05	True	True	False	False	False	4	False	False	False	Yes
1512	1758	andy4538	44	0	0	0	43	0	0	0	0	0	87	0	0	0	0	2.96814	5895.5	1	0	0	False	False	False	False	False	3	False	False	False	No
2790	1759	k200202	2	0	0	0	3	0	0	0	0	0	5	0	0	0	0	1	194	1	0	0	False	False	False	False	False	3	False	False	False	No
4048	1760	thshine	32	0	0	0	32	0	0	0	0	0	64	0	0	0	0	3.04411	2324.56	1	0	0	False	False	False	False	False	3	False	False	False	No
442	1761	gibson007	1	0	0	0	1	0	0	0	0	0	2	0	0	0	0	0	1881	1	0	0	False	False	False	False	False	3	False	False	False	Yes
1513	1762	andy6123	260	0.00384615	0	1	274	0	0.00364964	0.00364964	0	1	534	2	0.00187266	0.00374532	2	3.28294	3459.22	1	0	0	False	False	False	False	False	3	False	False	False	No
2791	1763	k25894148	3	0	0	0	2	0	0	0	0	0	5	0	0	0	0	1.58496	678.333	1	0	0	False	False	False	False	False	3	False	False	False	No
4049	1764	ti29615	291	0.00687285	0	2	312	0	0.00961538	0.00961538	0	3	603	5	0.00331675	0.00829187	5	3.17976	3054.57	1	0	0	False	False	False	False	False	3	False	False	False	No
443	1765	gkhkh7sy	1	0	0	0	0	0	0	0	0	0	1	0	0	0	0	0	14	1	1	0	False	False	False	False	False	0	False	False	False	Yes
1514	1766	andy931115	49	0.0204082	0	1	50	0	0.02	0.02	0	1	99	2	0.010101	0.020202	2	2.99917	1557.21	1	0	0	False	False	False	False	False	3	False	False	False	No
2792	1767	k29938664	1	0	0	0	15	0	0	0	0	0	16	0	0	0	0	0	157	1	0	0	False	False	False	False	False	3	False	False	False	No
4050	1768	tien_shirley	89	0.0674157	6	0	90	0	0.0555556	0.0555556	5	0	179	11	0.0335196	0.0614525	0	2.16468	466.268	1	0	0	False	False	False	False	False	3	False	False	False	No
444	1769	glksdgj	13	0	0	0	10	0	0	0	0	0	23	0	0	0	0	1.28067	63.1667	1	24	5.28952e-06	False	False	False	False	False	3	False	False	False	Yes
1515	1770	andyehs7	25	0.04	0	1	27	0	0.037037	0.037037	0	1	52	2	0.0192308	0.0384615	2	2.90195	6835	1	0	0	False	False	False	False	False	3	False	False	False	No
2793	1771	k4418	18	0	0	0	15	0	0	0	0	0	33	0	0	0	0	2.65564	1738.06	1	0	0	False	False	False	False	False	3	False	False	False	No
4051	1772	tigerlisa	44	0.0454545	0	2	45	0	0.0444444	0.0444444	0	2	89	4	0.0224719	0.0449438	4	2.87971	3268.86	1	0	0	False	False	False	False	False	3	False	False	False	No
445	1773	glskdjglk	21	0	0	0	26	0	0	0	0	0	47	0	0	0	0	1.63825	66.3158	2	38.2034	0.00114167	True	False	False	False	False	4	False	False	False	Yes
1516	1774	andywei1121	87	0.0574713	0	5	90	0	0.0555556	0.0555556	0	5	177	10	0.0282486	0.0564972	10	3.1247	2333.31	1	0	0	False	False	False	False	False	3	False	False	False	No
2794	1775	k45410011	12	0	0	0	35	0	0	0	0	0	47	0	0	0	0	1.82501	149.417	3	0	8.35111e-07	True	True	False	False	False	4	False	False	False	No
4052	1776	tim0198	22	0	0	0	24	0	0	0	0	0	46	0	0	0	0	2.84237	930.929	1	0	0	False	False	False	False	False	3	False	False	False	No
446	1777	goldinzheng	4	0	0	0	3	0	0	0	0	0	7	0	0	0	0	0.811278	62.25	1	8	4.80865e-07	False	False	False	False	False	3	False	False	False	Yes
1517	1778	ang520ang	76	0.0789474	1	5	79	0	0.0759494	0.0759494	1	5	155	12	0.0387097	0.0774194	10	3.22062	6339.08	1	0	0	False	False	False	False	False	3	False	False	False	No
2795	1779	k512345k	60	0	0	0	61	0	0.0163934	0.0163934	1	0	121	1	0	0.00826446	0	2.92489	6020.35	1	0	0	False	False	False	False	False	3	False	False	False	No
4053	1780	tim19970120	20	0	0	0	22	0	0	0	0	0	42	0	0	0	0	2.68872	2803.42	1	0	0	False	False	False	False	False	3	False	False	False	No
447	1781	goodsyizhou	6	0.833333	5	0	0	0	0	0	0	0	6	5	0.833333	0.833333	0	0	2	1	1	0	False	False	False	False	False	0	False	False	False	Yes
1518	1782	angel6070321	18	0	0	0	11	0	0	0	0	0	29	0	0	0	0	2.97356	4794.07	1	0	0	False	False	False	False	False	3	False	False	False	No
2796	1783	k516858888	13	0	0	0	13	0	0	0	0	0	26	0	0	0	0	2.96892	7166.31	1	0	0	False	False	False	False	False	3	False	False	False	No
4054	1784	timrice	22	0.0454545	0	1	18	0	0	0	0	0	40	1	0.025	0.025	1	3.05881	4567.44	1	0	0	False	False	False	False	False	3	False	False	False	No
448	1785	gorelickzen	5	1	5	0	0	0	0	0	0	0	5	5	1	1	0	0	0	0	0	0	False	False	False	False	False	0	False	False	False	Yes
1519	1786	angela_weng1214	225	0.0888889	20	0	249	0	0.0803213	0.0803213	20	0	474	40	0.0421941	0.0843882	0	2.68646	470.057	1	0	0	False	False	False	False	False	3	False	False	False	No
2797	1787	k56675	25	0	0	0	26	0	0	0	0	0	51	0	0	0	0	2.7744	5928.44	1	0	0	False	False	False	False	False	3	False	False	False	No
4055	1788	tin61222	59	0.186441	1	10	81	0	0.111111	0.111111	0	9	140	20	0.0785714	0.142857	19	3.27206	7466.46	1	0	0	False	False	False	False	False	3	False	False	False	No
449	1789	gr6mzjvu	2	0	0	0	0	0	0	0	0	0	2	0	0	0	0	0	3	1	0	0	False	False	False	False	False	3	False	False	False	Yes
1520	1790	angle840618	15	0.0666667	0	1	12	0	0	0	0	0	27	1	0.037037	0.037037	1	2.25163	16291.3	2	0	1.94387e-05	True	False	False	False	False	4	False	False	False	No
2798	1791	k5fcayfqdm	41	0.0243902	0	1	47	0	0.0212766	0.0212766	0	1	88	2	0.0113636	0.0227273	2	2.73739	1401.19	1	0	0	False	False	False	False	False	3	False	False	False	No
4056	1792	tina484790	1	0	0	0	2	0	0	0	0	0	3	0	0	0	0	0	186	1	0	0	False	False	False	False	False	3	False	False	False	No
450	1793	grahmzhishu	8	0.625	5	0	8	0	0.75	0.75	6	0	16	11	0.3125	0.6875	0	0.918296	67	1	6	2.40433e-07	False	False	False	False	False	3	False	False	False	Yes
1521	1794	aniko38	132	0.0378788	0	5	138	0	0.0217391	0.0217391	0	3	270	8	0.0185185	0.0296296	8	3.09186	6121.28	1	0	0	False	False	False	False	False	3	False	False	False	No
2799	1795	k6anana	6	0	0	0	8	0	0	0	0	0	14	0	0	0	0	2.25163	1479.33	1	0	0	False	False	False	False	False	3	False	False	False	No
4057	1796	tina850323	82	0	0	0	88	0	0	0	0	0	170	0	0	0	0	3.07134	3524.75	1	0	2.28411e-05	False	False	False	False	False	3	False	False	False	No
451	1797	greenozengf	5	1	5	0	5	0	1	1	5	0	10	10	0.5	1	0	0	0	0	0	0	False	False	False	False	False	0	False	False	False	Yes
1522	1798	anita0915_0529	14	0.928571	0	13	19	0	0.263158	0.263158	0	5	33	18	0.393939	0.545455	18	0	27095	2	0	0.00357606	True	False	False	False	False	3	False	False	False	No
2800	1799	k77889973	35	0	0	0	40	0	0	0	0	0	75	0	0	0	0	2.99992	2841.15	1	1	0	False	False	False	False	False	0	False	False	False	No
4058	1800	tina860413	26	0.115385	0	3	24	0	0	0	0	0	50	3	0.06	0.06	3	2.82059	8848.37	1	0	0	False	False	False	False	False	3	False	False	False	No
452	1801	greifyinjue	6	0.833333	5	0	1	0	0	0	0	0	7	5	0.714286	0.714286	0	0	22	1	1	0	False	False	False	False	False	0	False	False	False	Yes
1523	1802	anita0922735877	52	0.0961538	0	5	49	0	0.102041	0.102041	0	5	101	10	0.049505	0.0990099	10	2.87373	1046.6	1	0	0	False	False	False	False	False	3	False	False	False	No
2801	1803	k800938	46	0	0	0	46	0	0	0	0	0	92	0	0	0	0	3.1713	4372.06	1	0	0	False	False	False	False	False	3	False	False	False	No
4059	1804	ting10928	21	0.190476	0	4	24	0	0.208333	0.208333	0	5	45	9	0.0888889	0.2	9	2.82782	1771.75	1	0	0	False	False	False	False	False	3	False	False	False	No
453	1805	grimesfazgd	5	0.4	2	0	2	0	0	0	0	0	7	2	0.285714	0.285714	0	1	77.5	1	3	1.60288e-07	False	False	False	False	False	3	False	False	False	Yes
1524	1806	anita518999	26	0	0	0	25	0	0	0	0	0	51	0	0	0	0	2.85988	3732.78	1	0	0	False	False	False	False	False	3	False	False	False	No
2802	1807	k82602815	3	0	0	0	7	0	0	0	0	0	10	0	0	0	0	1	99	1	0	0	False	False	False	False	False	3	False	False	False	No
4060	1808	ting4387	41	0	0	0	39	0	0	0	0	0	80	0	0	0	0	3.2234	2670.57	1	0	0	False	False	False	False	False	3	False	False	False	No
454	1809	grimmj62802	1	0	0	0	1	0	0	0	0	0	2	0	0	0	0	0	334	1	1	0	False	False	False	False	False	0	False	False	False	Yes
1525	1810	anitaan	27	0.037037	1	0	29	0	0.0344828	0.0344828	1	0	56	2	0.0178571	0.0357143	0	2.65315	947.522	1	0	0	False	False	False	False	False	3	False	False	False	No
2803	1811	k83621	3	0	0	0	2	0	0	0	0	0	5	0	0	0	0	1	2547.5	1	0	0	False	False	False	False	False	3	False	False	False	No
4061	1812	ting530ya	2	0	0	0	2	0	0	0	0	0	4	0	0	0	0	1	53	1	0	0	False	False	False	False	False	3	False	False	False	No
455	1813	grswhgesg	16	0	0	0	0	0	0	0	0	0	16	0	0	0	0	0.468996	35.4	2	20.8221	2.22963e-05	True	False	False	False	False	4	False	False	False	Yes
1526	1814	anlihsieh	8	0.875	0	7	24	0	0.291667	0.291667	0	7	32	14	0.21875	0.4375	14	0	359	1	0	0	False	False	False	False	False	3	False	False	False	No
2804	1815	k928646950	8	0.125	1	0	10	0	0.1	0.1	1	0	18	2	0.0555556	0.111111	0	1.84237	798.714	1	0	0	False	False	False	False	False	3	False	False	False	No
4062	1816	ting7828	148	0.0337838	5	0	149	0	0.0536913	0.0536913	8	0	297	13	0.016835	0.043771	0	3.17923	2559.44	1	0	0	False	False	False	False	False	3	False	False	False	No
456	1817	gsalkdjgl	9	0	0	0	9	0	0	0	0	0	18	0	0	0	0	0.986427	65.2222	1	18	2.88519e-06	False	False	False	False	False	3	False	False	False	Yes
1527	1818	ann0526	1	0	0	0	2	0	0.5	0.5	0	1	3	1	0	0.333333	1	0	2686	1	0	0	False	False	False	False	False	3	False	False	False	No
2805	1819	k96r5e	287	0.763066	0	219	447	0	0.472036	0.472036	0	211	734	430	0.298365	0.585831	430	2.62352	395.077	1	0	0	False	False	False	False	False	3	False	False	False	No
4063	1820	ting983	11	0.0909091	0	1	11	0	0.0909091	0.0909091	0	1	22	2	0.0454545	0.0909091	2	2.04644	717.1	1	0	9.6173e-07	False	False	False	False	False	3	False	False	False	No
457	1821	gskdjgfslkdjflk	4	0.5	2	0	0	0	0	0	0	0	4	2	0.5	0.5	0	0	34	1	1	0	False	False	False	False	False	0	False	False	False	Yes
1528	1822	annie12397	4	0	0	0	4	0	0	0	0	0	8	0	0	0	0	1.5	18241.2	1	0	0	False	False	False	False	False	3	False	False	False	No
2806	1823	k999k99	97	0.0103093	0	1	93	0	0.0107527	0.0107527	0	1	190	2	0.00526316	0.0105263	2	3.12026	3120.71	1	0	0	False	False	False	False	False	3	False	False	False	No
4064	1824	tivalino	1	0	0	0	2	0	0	0	0	0	3	0	0	0	0	0	367	1	0	0	False	False	False	False	False	3	False	False	False	No
458	1825	gt626c47	1	0	0	0	0	0	0	0	0	0	1	0	0	0	0	0	7	1	1	0	False	False	False	False	False	0	False	False	False	Yes
1529	1826	annie501028	95	0	0	0	99	0	0	0	0	0	194	0	0	0	0	3.16546	2817.84	1	0	0	False	False	False	False	False	3	False	False	False	No
2808	1827	kag183	6	0	0	0	6	0	0	0	0	0	12	0	0	0	0	2.25163	3359.5	1	0	0	False	False	False	False	False	3	False	False	False	No
4065	1828	tjpfup3499	2	0	0	0	3	0	0	0	0	0	5	0	0	0	0	0	2670.5	1	0	0	False	False	False	False	False	3	False	False	False	No
459	1829	gx8272t2	7	0	0	0	0	0	0	0	0	0	7	0	0	0	0	0.650022	29	4	0	0.000263352	True	True	True	False	False	4	False	False	False	Yes
1530	1830	anniejie	16	0	0	0	11	0	0	0	0	0	27	0	0	0	0	2.95021	2469.14	1	0	0	False	False	False	False	False	3	False	False	False	No
2809	1831	kaga0228	1065	0.104225	105	6	1211	0	0.0999174	0.0999174	115	6	2276	232	0.0487698	0.101933	12	2.22302	318.828	1	0	0	False	False	False	False	False	3	False	False	False	No
4066	1832	tkb147	61	0.0327869	2	0	64	0	0.03125	0.03125	2	0	125	4	0.016	0.032	0	3.1561	4171.87	1	0	0	False	False	False	False	False	3	False	False	False	No
460	1833	h5445	21	0.190476	4	0	0	0	0	0	0	0	21	4	0.190476	0.190476	0	0	1	1	4	8.01442e-08	False	False	False	False	False	0	False	False	False	Yes
1531	1834	answer0630	8	0.125	0	1	7	0	0	0	0	0	15	1	0.0666667	0.0666667	1	1.79248	546.167	1	1	0	False	False	False	False	False	0	False	False	False	No
2810	1835	kagomeli	16	0	0	0	16	0	0	0	0	0	32	0	0	0	0	2.28778	1005.38	1	0	0	False	False	False	False	False	3	False	False	False	No
4067	1836	tnbbobhj	530	0.00377358	0	2	563	0	0	0	0	0	1093	2	0.00182983	0.00182983	2	3.3221	3201.55	1	0	0	False	False	False	False	False	3	False	False	False	No
461	1837	h56441000	52	0.903846	47	0	53	0	0.886792	0.886792	47	0	105	94	0.447619	0.895238	0	0.918296	186.667	1	0	4.72851e-06	False	False	False	False	False	3	False	False	False	Yes
1532	1838	anto768111	50	0.02	1	0	49	0	0.0408163	0.0408163	2	0	99	3	0.010101	0.030303	0	3.04756	4061.27	1	0	0	False	False	False	False	False	3	False	False	False	No
2811	1839	kai020433979	6	0.666667	0	4	35	0	0.428571	0.428571	0	15	41	19	0.097561	0.463415	19	0	3751	2	0	1.18461e-05	True	False	False	False	False	4	False	False	False	No
4068	1840	to200168	7	0.428571	0	3	2	0	0	0	0	0	9	3	0.333333	0.333333	3	0.918296	1892	1	1	0	False	False	False	False	False	0	False	False	False	No
462	1841	h56sfy	2	0	0	0	0	0	0	0	0	0	2	0	0	0	0	0	6	1	0	0	False	False	False	False	False	0	False	False	False	Yes
1533	1842	anyone58106	50	0	0	0	46	0	0	0	0	0	96	0	0	0	0	2.93868	1251.8	1	0	0	False	False	False	False	False	3	False	False	False	No
2812	1843	kai9	203	0	0	0	209	0	0	0	0	0	412	0	0	0	0	3.17136	1759.74	1	1	0	False	False	False	False	False	0	False	False	False	No
4069	1844	toloveangel520	25	0	0	0	25	0	0	0	0	0	50	0	0	0	0	2.54961	3399.55	1	0	0	False	False	False	False	False	3	False	False	False	No
463	1845	h56sfy2g	1	0	0	0	0	0	0	0	0	0	1	0	0	0	0	0	681	1	1	0	False	False	False	False	False	0	False	False	False	Yes
1534	1846	ao3g4sm31	3	0	0	0	4	0	0	0	0	0	7	0	0	0	0	1.58496	910.667	1	0	0	False	False	False	False	False	3	False	False	False	No
2813	1847	kaikai123	9	0	0	0	8	0	0	0	0	0	17	0	0	0	0	1.9183	6183.33	1	0	0	False	False	False	False	False	3	False	False	False	No
4070	1848	toltol681	13	0	0	0	15	0	0	0	0	0	28	0	0	0	0	2.12809	9327	1	0	0	False	False	False	False	False	3	False	False	False	No
464	1849	h7f4tym	2	0	0	0	31	0	0.903226	0.903226	0	28	33	28	0	0.848485	28	1	121.5	1	4	8.01442e-08	False	False	False	False	False	3	False	False	False	Yes
1535	1850	ap92901	1	0	0	0	4	0	0	0	0	0	5	0	0	0	0	0	944	1	0	0	False	False	False	False	False	3	False	False	False	No
2814	1851	kaiser0929	6	0.666667	0	4	7	0	0.571429	0.571429	0	4	13	8	0.307692	0.615385	8	1	2030.5	1	0	0	False	False	False	False	False	3	False	False	False	No
4071	1852	tom747200	102	0.00980392	0	1	87	0	0.0114943	0.0114943	0	1	189	2	0.00529101	0.010582	2	3.12884	3279.37	1	0	0	False	False	False	False	False	3	False	False	False	No
465	1853	h852m1tx	9	0.222222	2	0	6	0	0.166667	0.166667	1	0	15	3	0.133333	0.2	0	0	3.66667	3	11.3835	4.89452e-07	True	True	False	False	False	4	False	False	False	Yes
1536	1854	apahung	16	0.0625	0	1	14	0	0.0714286	0.0714286	0	1	30	2	0.0333333	0.0666667	2	3.18083	3738.69	1	0	0	False	False	False	False	False	3	False	False	False	No
2815	1855	kaketsu7298	220	0.00909091	0	2	225	0	0.0133333	0.0133333	0	3	445	5	0.00449438	0.011236	5	3.33127	5847.74	1	0	0	False	False	False	False	False	3	False	False	False	No
4072	1856	tome31126	11	0.363636	0	4	27	0	0.222222	0.222222	0	6	38	10	0.105263	0.263158	10	0.811278	55.75	2	0	0.000215091	True	False	False	False	False	4	False	False	False	No
466	1857	hack869	188	0.696809	131	0	112	0	0.455357	0.455357	49	2	300	182	0.436667	0.606667	2	0.828056	34.4348	1	48	2.20397e-05	False	False	False	False	False	3	False	False	False	Yes
1537	1858	apao6162	39	0.25641	0	10	45	0	0.222222	0.222222	0	10	84	20	0.119048	0.238095	20	2.85846	5721	1	0	0	False	False	False	False	False	3	False	False	False	No
2816	1859	kalamy5971	19	0.157895	0	3	14	0	0.0714286	0.0714286	0	1	33	4	0.0909091	0.121212	4	2.44931	8280.23	1	0	0	False	False	False	False	False	3	False	False	False	No
4073	1860	tomfool1688	1237	0.00161681	0	2	1256	0	0.00159236	0.00159236	0	2	2493	4	0.000802246	0.00160449	4	3.25853	2744.44	1	0	0	False	False	False	False	False	3	False	False	False	No
467	1861	haewa	4	0	0	0	5	0	0	0	0	0	9	0	0	0	0	1.58496	185.333	1	5.0375	2.92526e-05	False	False	False	False	False	3	False	False	False	Yes
1538	1862	apostall	78	0	0	0	78	0	0	0	0	0	156	0	0	0	0	3.15227	5195.65	1	0	0	False	False	False	False	False	3	False	False	False	No
2817	1863	kami7283	134	0.0820896	0	11	135	0	0.0814815	0.0814815	0	11	269	22	0.0408922	0.0817844	22	2.30956	7317.47	1	0	0	False	False	False	False	False	3	False	False	False	No
4074	1864	tommy4672	9	0.111111	0	1	12	0	0.0833333	0.0833333	0	1	21	2	0.047619	0.0952381	2	2.75	1399.62	1	0	0	False	False	False	False	False	3	False	False	False	No
468	1865	hafaf23sd	1	0	0	0	0	0	0	0	0	0	1	0	0	0	0	0	34	1	1	0	False	False	False	False	False	0	False	False	False	Yes
1539	1866	appap11111	104	0.221154	0	23	112	0	0.205357	0.205357	0	23	216	46	0.106481	0.212963	46	3.12621	4052.44	1	0	0	False	False	False	False	False	3	False	False	False	No
2818	1867	kamitai	53	0	0	0	54	0	0	0	0	0	107	0	0	0	0	3.02491	1326.86	1	0	0	False	False	False	False	False	3	False	False	False	No
4075	1868	tomweis82	16	0	0	0	15	0	0	0	0	0	31	0	0	0	0	2.72193	4449.5	1	0	0	False	False	False	False	False	3	False	False	False	No
469	1869	hallosaxiy	6	0.833333	5	0	0	0	0	0	0	0	6	5	0.833333	0.833333	0	0	99	1	1	0	False	False	False	False	False	0	False	False	False	Yes
1540	1870	appduck0111	23	0	0	0	13	0	0	0	0	0	36	0	0	0	0	2.7719	5567.47	1	0	0	False	False	False	False	False	3	False	False	False	No
2819	1871	kane96321	3	0	0	0	6	0	0	0	0	0	9	0	0	0	0	1	114.5	2	0	2.73203e-06	True	False	False	False	False	3	False	False	False	No
4076	1872	tony177167	92	0	0	0	93	0	0	0	0	0	185	0	0	0	0	3.11416	6455.14	1	0	0	False	False	False	False	False	3	False	False	False	No
470	1873	hanhphucnoiphuongxa1	46	0	0	0	22	0	0	0	0	0	68	0	0	0	0	0.106594	14.0769	2	33.6156	5.49652e-05	True	False	False	False	False	4	False	False	False	Yes
1541	1874	appie0528	11	0	0	0	10	0	0	0	0	0	21	0	0	0	0	2.9477	3720	1	0	0	False	False	False	False	False	3	False	False	False	No
2820	1875	kanee987	44	0.0227273	0	1	46	0	0.0217391	0.0217391	0	1	90	2	0.0111111	0.0222222	2	2.8428	5248.18	1	0	0	False	False	False	False	False	3	False	False	False	No
4077	1876	tony29932203	1	0	0	0	7	0	0	0	0	0	8	0	0	0	0	0	337	1	0	0	False	False	False	False	False	3	False	False	False	No
471	1877	hanmo771	6	0	0	0	1	0	0	0	0	0	7	0	0	0	0	0	21	1	10	8.01442e-07	False	False	False	False	False	3	False	False	False	Yes
1542	1878	apple011126	9	0	0	0	5	0	0	0	0	0	14	0	0	0	0	1.44882	4672.71	1	0	0	False	False	False	False	False	3	False	False	False	No
2821	1879	kao40533	20	0	0	0	21	0	0	0	0	0	41	0	0	0	0	2.65354	10897.9	1	0	0	False	False	False	False	False	3	False	False	False	No
4078	1880	tony840303	73	0.0136986	0	1	74	0	0.0135135	0.0135135	0	1	147	2	0.00680272	0.0136054	2	3.22978	7830.6	1	0	0	False	False	False	False	False	3	False	False	False	No
472	1881	hao2005	1	0	0	0	0	0	0	0	0	0	1	0	0	0	0	0	105	1	1	0	False	False	False	False	False	0	False	False	False	Yes
1543	1882	apple1995320	121	0	0	0	125	0	0	0	0	0	246	0	0	0	0	2.82102	604.447	1	0	0	False	False	False	False	False	3	False	False	False	No
2822	1883	kao5732	20	0	0	0	19	0	0	0	0	0	39	0	0	0	0	2.68925	3023.6	1	0	0	False	False	False	False	False	3	False	False	False	No
4079	1884	tonytsaiucb	48	0.0625	0	3	42	0	0.0952381	0.0952381	0	4	90	7	0.0333333	0.0777778	7	3.10091	3023.22	1	0	0	False	False	False	False	False	3	False	False	False	No
473	1885	happy1314923	23	0.0869565	0	2	11	0	0.0909091	0.0909091	0	1	34	3	0.0588235	0.0882353	3	2.47291	3874.47	1	30	8.41514e-06	False	False	False	False	False	3	False	False	False	Yes
1544	1886	apple2339	25	0.04	0	1	26	0	0.0769231	0.0769231	0	2	51	3	0.0196078	0.0588235	3	3.13072	5213.53	1	0	0	False	False	False	False	False	3	False	False	False	No
2823	1887	kaoyang68	25	0.04	0	1	12	0	0	0	0	0	37	1	0.027027	0.027027	1	2.82424	1949.5	1	0	0	False	False	False	False	False	3	False	False	False	No
4080	1888	toro12e	6	0	0	0	7	0	0	0	0	0	13	0	0	0	0	1.9183	1895.83	1	0	0	False	False	False	False	False	3	False	False	False	No
474	1889	harmonz	1259	0.178713	225	0	2813	0	0.204764	0.204764	576	0	4072	801	0.0552554	0.196709	0	2.37459	214.096	2	325.052	0.00132118	True	False	False	False	False	4	False	False	False	Yes
1545	1890	apple27	11	0.545455	1	5	14	0	0.5	0.5	2	5	25	13	0.24	0.52	10	2	5271.25	1	0	0	False	False	False	False	False	3	False	False	False	No
2825	1891	karta0739512	39	0	0	0	46	0	0	0	0	0	85	0	0	0	0	2.7668	5365.29	1	0	3.97515e-05	False	False	False	False	False	3	False	False	False	No
4081	1892	torosun	84	0.0833333	7	0	90	0	0.0777778	0.0777778	7	0	174	14	0.0402299	0.0804598	0	2.34122	234.636	1	0	0	False	False	False	False	False	3	False	False	False	No
475	1893	harsyleng	4	1	4	0	0	0	0	0	0	0	4	4	1	1	0	0	0	0	0	0	False	False	False	False	False	0	False	False	False	Yes
1546	1894	apple386387	751	0.121172	91	0	881	0	0.120318	0.120318	106	0	1632	197	0.0557598	0.120711	0	2.27143	289.298	1	0	0	False	False	False	False	False	3	False	False	False	No
2826	1895	karta2777269	23	0	0	0	20	0	0	0	0	0	43	0	0	0	0	2.55605	3276.18	1	0	0	False	False	False	False	False	3	False	False	False	No
4082	1896	touhou88442266	18	0.5	0	9	19	0	0.473684	0.473684	0	9	37	18	0.243243	0.486486	18	2.28104	4855.44	1	0	0	False	False	False	False	False	3	False	False	False	No
476	1897	hauwvr	31	0	0	0	32	0	0	0	0	0	63	0	0	0	0	1.49111	75	1	22	4.40793e-06	False	False	False	False	False	3	False	False	False	Yes
1547	1898	apple53198	32	0	0	0	32	0	0	0	0	0	64	0	0	0	0	2.52494	5790.17	1	0	0	False	False	False	False	False	3	False	False	False	No
2827	1899	karta278472	2	0	0	0	5	0	0	0	0	0	7	0	0	0	0	1	1595	1	0	0	False	False	False	False	False	3	False	False	False	No
4083	1900	tower5959	6	0	0	0	4	0	0	0	0	0	10	0	0	0	0	1.9183	5425.67	1	0	0	False	False	False	False	False	3	False	False	False	No
477	1901	havemanlvb	6	0.833333	5	0	1	0	0	0	0	0	7	5	0.714286	0.714286	0	0	171	1	1	0	False	False	False	False	False	0	False	False	False	Yes
1548	1902	apple730506	1490	0.2	294	4	1773	0	0.190637	0.190637	334	4	3263	636	0.091327	0.194913	8	2.37266	316.852	1	0	0	False	False	False	False	False	3	False	False	False	No
2828	1903	karta2808393	10	0.2	0	2	5	0	0	0	0	0	15	2	0.133333	0.133333	2	2.52164	10661.9	1	0	0	False	False	False	False	False	3	False	False	False	No
4084	1904	tp6jo354	7	0	0	0	9	0	0	0	0	0	16	0	0	0	0	2.52164	4481.86	1	0	0	False	False	False	False	False	3	False	False	False	No
478	1905	hbhne	4	0	0	0	0	0	0	0	0	0	4	0	0	0	0	0	20	1	0	0	False	False	False	False	False	3	False	False	False	Yes
1549	1906	apple730507	185	0.108108	19	1	210	0	0.0904762	0.0904762	19	0	395	39	0.0506329	0.0987342	1	2.63224	631.985	1	0	0	False	False	False	False	False	3	False	False	False	No
2829	1907	karta29027	13	0.0769231	0	1	16	0	0.0625	0.0625	0	1	29	2	0.0344828	0.0689655	2	2.85539	2253.08	1	0	0	False	False	False	False	False	3	False	False	False	No
4085	1908	tp6vul3jo15982	1	0	0	0	2	0	0	0	0	0	3	0	0	0	0	0	1591	1	1	0	False	False	False	False	False	0	False	False	False	No
479	1909	hddee	6	0	0	0	4	0	0	0	0	0	10	0	0	0	0	0	7.5	1	8	8.01442e-07	False	False	False	False	False	3	False	False	False	Yes
1550	1910	apple7789425	6	0	0	0	5	0	0	0	0	0	11	0	0	0	0	2.58496	12199.7	1	1	0	False	False	False	False	False	0	False	False	False	No
2830	1911	karta84573	7	0	0	0	7	0	0	0	0	0	14	0	0	0	0	2.12809	3047.29	1	0	0	False	False	False	False	False	3	False	False	False	No
4086	1912	tpe371	20	0.1	0	2	19	0	0.105263	0.105263	0	2	39	4	0.0512821	0.102564	4	2.86383	4941.72	1	0	0	False	False	False	False	False	3	False	False	False	No
480	1913	hdfh21	5	0.4	2	0	4	0	0.5	0.5	2	0	9	4	0.222222	0.444444	0	1	115	1	4	8.01442e-08	False	False	False	False	False	3	False	False	False	Yes
1551	1914	apsycul	104	0	0	0	100	0	0	0	0	0	204	0	0	0	0	3.11879	6670.83	1	0	0	False	False	False	False	False	3	False	False	False	No
2831	1915	katy6895	18	0.388889	4	3	22	0	0.363636	0.363636	5	3	40	15	0.175	0.375	6	2.24644	259.4	1	0	0	False	False	False	False	False	3	False	False	False	No
4087	1916	tr259872	23	0.217391	2	3	27	0	0.259259	0.259259	4	3	50	12	0.1	0.24	6	2.66329	6663.83	1	0	0	False	False	False	False	False	3	False	False	False	No
481	1917	hdfhlkmh	5	0	0	0	0	0	0	0	0	0	5	0	0	0	0	0	5.75	1	7.57143	0.000119014	False	False	False	False	False	3	False	False	False	Yes
1552	1918	aq168qq168	23	0.0869565	0	2	26	0	0.0769231	0.0769231	0	2	49	4	0.0408163	0.0816327	4	3.12799	3171.22	1	0	0	False	False	False	False	False	3	False	False	False	No
2832	1919	kaufman926	80	0.0125	1	0	86	0	0.0116279	0.0116279	1	0	166	2	0.0060241	0.0120482	0	2.87078	1342.56	1	0	0	False	False	False	False	False	3	False	False	False	No
4088	1920	tracy_lee255	1	0	0	0	1	0	0	0	0	0	2	0	0	0	0	0	77	1	0	0	False	False	False	False	False	3	False	False	False	No
482	1921	heyik6	8	0	0	0	18	0	0	0	0	0	26	0	0	0	0	1.6645	90.5714	1	16	2.16389e-06	False	False	False	False	False	3	False	False	False	Yes
1553	1922	aqswdefr87715	70	0	0	0	73	0	0	0	0	0	143	0	0	0	0	2.98397	10180.8	1	0	0	False	False	False	False	False	3	False	False	False	No
2833	1923	kaushin	36	0	0	0	37	0	0	0	0	0	73	0	0	0	0	2.79886	2192.78	1	0	0	False	False	False	False	False	3	False	False	False	No
4089	1924	travelfox	194	0.175258	6	28	201	0	0.159204	0.159204	6	26	395	66	0.0860759	0.167089	54	2.96039	1113.31	1	0	0	False	False	False	False	False	3	False	False	False	No
483	1925	hf782	4	0	0	0	0	0	0	0	0	0	4	0	0	0	0	0	1.5	2	6.78788	8.49529e-07	True	False	False	False	False	3	False	False	False	Yes
1554	1926	arashiohno5	36	0	0	0	24	0	0	0	0	0	60	0	0	0	0	3.28261	4946.67	1	0	0	False	False	False	False	False	3	False	False	False	No
2834	1927	kbs0328	1	0	0	0	5	0	0	0	0	0	6	0	0	0	0	0	37	1	0	0	False	False	False	False	False	3	False	False	False	No
4090	1928	treea00	20	0	0	0	21	0	0	0	0	0	41	0	0	0	0	3.15564	2381.94	1	0	0	False	False	False	False	False	3	False	False	False	No
484	1929	hfgdfd	9	0.111111	1	0	5	0	0	0	0	0	14	1	0.0714286	0.0714286	0	0.650022	39.1667	1	12	1.20216e-06	False	False	False	False	False	3	False	False	False	Yes
1555	1930	archangel_seal	46	0.0217391	0	1	47	0	0.0425532	0.0425532	0	2	93	3	0.0107527	0.0322581	3	2.74042	4532.75	1	0	0	False	False	False	False	False	3	False	False	False	No
2835	1931	kc7749kcpc	26	0	0	0	28	0	0	0	0	0	54	0	0	0	0	2.91969	3463.68	1	0	0	False	False	False	False	False	3	False	False	False	No
4091	1932	trouble9	6	0	0	0	8	0	0	0	0	0	14	0	0	0	0	1.9183	7541.83	1	0	0	False	False	False	False	False	3	False	False	False	No
485	1933	hg34sdfs	1	0	0	0	0	0	0	0	0	0	1	0	0	0	0	0	37	1	0	0	False	False	False	False	False	3	False	False	False	Yes
1556	1934	area0920	296	0.263514	8	70	263	0	0.220532	0.220532	6	52	559	136	0.139535	0.243292	122	3.18186	2014.7	1	0	0	False	False	False	False	False	3	False	False	False	No
2836	1935	kcrz2007211	12	0.0833333	0	1	12	0	0.0833333	0.0833333	0	1	24	2	0.0416667	0.0833333	2	2.58496	5867	1	0	0	False	False	False	False	False	3	False	False	False	No
4092	1936	truelove391	4	0	0	0	4	0	0	0	0	0	8	0	0	0	0	1.58496	4967	1	0	0	False	False	False	False	False	3	False	False	False	No
486	1937	hgdf435	2	0	0	0	0	0	0	0	0	0	2	0	0	0	0	0	1	2	0	2.67147e-08	True	False	False	False	False	3	False	False	False	Yes
1557	1938	arere1231	5	0	0	0	3	0	0	0	0	0	8	0	0	0	0	1.52193	1531.6	1	0	0	False	False	False	False	False	3	False	False	False	No
2837	1939	kd_468	66	0.106061	7	0	66	0	0.106061	0.106061	7	0	132	14	0.0530303	0.106061	0	2.97183	1444.52	1	0	0	False	False	False	False	False	3	False	False	False	No
4093	1940	tryit249698	14	0.0714286	0	1	14	0	0.0714286	0.0714286	0	1	28	2	0.0357143	0.0714286	2	2.73216	5029.18	1	1	0	False	False	False	False	False	0	False	False	False	No
487	1941	hghgfdjyhd	1	0	0	0	0	0	0	0	0	0	1	0	0	0	0	0	17	1	1	0	False	False	False	False	False	0	False	False	False	Yes
1560	1942	ariel6c	19	0	0	0	10	0	0.1	0.1	1	0	29	1	0	0.0344828	0	3.04411	2944.56	1	0	0	False	False	False	False	False	3	False	False	False	No
2838	1943	kei07101217	42	0.047619	0	2	39	0	0	0	0	0	81	2	0.0246914	0.0246914	2	3.10701	2889.41	1	0	0	False	False	False	False	False	3	False	False	False	No
4094	1944	tsaimohan	2	0	0	0	2	0	0	0	0	0	4	0	0	0	0	1	1126.5	1	0	0	False	False	False	False	False	3	False	False	False	No
488	1945	hgjhgdrh	5	1	5	0	0	0	0	0	0	0	5	5	1	1	0	0	0	0	0	0	False	False	False	False	False	0	False	False	False	Yes
1561	1946	aries0566	20	0	0	0	3	0	0	0	0	0	23	0	0	0	0	2.84535	4934.36	1	0	0	False	False	False	False	False	3	False	False	False	No
2839	1947	keita42625	5	0	0	0	5	0	0	0	0	0	10	0	0	0	0	2	18675.5	1	0	0	False	False	False	False	False	3	False	False	False	No
4095	1948	tsengac1	32	0	0	0	34	0	0	0	0	0	66	0	0	0	0	2.59467	1494.7	1	0	0	False	False	False	False	False	3	False	False	False	No
489	1949	hgjkdshgkj	2	1	2	0	0	0	0	0	0	0	2	2	1	1	0	0	0	0	0	0	False	False	False	False	False	0	False	False	False	Yes
1562	1950	arion0705	17	0	0	0	18	0	0	0	0	0	35	0	0	0	0	2.66353	4295.82	1	0	0	False	False	False	False	False	3	False	False	False	No
2840	1951	kell0124	21	0	0	0	19	0	0	0	0	0	40	0	0	0	0	2.37878	9081.71	1	0	0	False	False	False	False	False	3	False	False	False	No
4096	1952	tso234	174	0	0	0	180	0	0	0	0	0	354	0	0	0	0	3.15848	2082.45	1	0	0	False	False	False	False	False	3	False	False	False	No
490	1953	hgklsdjfk	33	0.969697	32	0	0	0	0	0	0	0	33	32	0.969697	0.969697	0	0	4	1	1	0	False	False	False	False	False	0	False	False	False	Yes
1563	1954	arkittw	29	0.0689655	2	0	26	0	0.0384615	0.0384615	1	0	55	3	0.0363636	0.0545455	0	2.62922	736.682	1	0	0	False	False	False	False	False	3	False	False	False	No
2841	1955	kelly202529593	12787	0.0943927	1189	18	14680	0	0.094346	0.094346	1374	11	27467	2592	0.0439436	0.0943678	29	1.6016	71.2191	1	0	0	False	False	False	False	False	3	False	False	False	No
4097	1956	tt1772tt	38	0.631579	0	24	43	0	0.534884	0.534884	0	23	81	47	0.296296	0.580247	47	2.4116	412.923	1	0	0	False	False	False	False	False	0	False	False	False	No
491	1957	hh5rcv	30	0.0333333	1	0	0	0	0	0	0	0	30	1	0.0333333	0.0333333	0	0.297472	15.2105	1	40	1.51472e-05	False	False	False	False	False	4	False	False	False	Yes
1564	1958	arode99	1	0	0	0	1	0	0	0	0	0	2	0	0	0	0	0	2	1	0	0	False	False	False	False	False	3	False	False	False	No
2842	1959	kelly402	48	0	0	0	39	0	0	0	0	0	87	0	0	0	0	2.61058	5472.43	1	0	0	False	False	False	False	False	3	False	False	False	No
4098	1960	tt262003	10	0.9	0	9	29	0	0.448276	0.448276	0	13	39	22	0.230769	0.564103	22	0	5	2	0	3.24291e-05	True	False	False	False	False	4	False	False	False	No
492	1961	hhcmh2xr	20	0	0	0	0	0	0	0	0	0	20	0	0	0	0	0	1	2	0	3.62519e-05	True	False	False	False	False	3	False	False	False	Yes
1565	1962	arry8888	6	0	0	0	2	0	0	0	0	0	8	0	0	0	0	1.9183	1872.33	1	0	0	False	False	False	False	False	3	False	False	False	No
2843	1963	kelly5209994	14	0	0	0	15	0	0	0	0	0	29	0	0	0	0	2.58496	3173.92	1	0	0	False	False	False	False	False	3	False	False	False	No
4099	1964	tt7388581	61	0.0655738	4	0	74	0	0.0945946	0.0945946	7	0	135	11	0.0296296	0.0814815	0	3.12606	2522.06	1	0	0	False	False	False	False	False	3	False	False	False	No
493	1965	hiramx	9	0	0	0	0	0	0	0	0	0	9	0	0	0	0	0	2	1	10	8.01442e-07	False	False	False	False	False	3	False	False	False	Yes
1566	1966	art70907	1	0	0	0	1	0	0	0	0	0	2	0	0	0	0	0	7	1	0	0	False	False	False	False	False	3	False	False	False	No
2844	1967	kelvinzero	6	0	0	0	7	0	0	0	0	0	13	0	0	0	0	2.25163	487	1	0	0	False	False	False	False	False	3	False	False	False	No
4101	1968	tteacherr21	16	0	0	0	17	0	0	0	0	0	33	0	0	0	0	2.45915	8276.17	1	0	0	False	False	False	False	False	3	False	False	False	No
494	1969	hjdas87w	24	1	24	0	0	0	0	0	0	0	24	24	1	1	0	0	0	0	0	0	False	False	False	False	False	0	False	False	False	Yes
1567	1970	artonbo	86	0	0	0	96	0	0	0	0	0	182	0	0	0	0	3.15547	1926.12	1	0	0	False	False	False	False	False	3	False	False	False	No
2845	1971	ken04261	1	0	0	0	1	0	0	0	0	0	2	0	0	0	0	0	18	1	0	0	False	False	False	False	False	3	False	False	False	No
4102	1972	tted0316	62	0.0967742	0	6	57	0	0.105263	0.105263	0	6	119	12	0.0504202	0.10084	12	2.99056	5149.94	1	0	0	False	False	False	False	False	3	False	False	False	No
495	1973	hjfgdf	1	0	0	0	0	0	0	0	0	0	1	0	0	0	0	0	9	1	1	0	False	False	False	False	False	0	False	False	False	Yes
1568	1974	as0116119	7	0	0	0	9	0	0	0	0	0	16	0	0	0	0	1.9183	4884.67	1	0	3.60649e-06	False	False	False	False	False	3	False	False	False	No
2846	1975	ken19921207	22	0	0	0	11	0	0	0	0	0	33	0	0	0	0	2.86659	5304	1	0	0	False	False	False	False	False	3	False	False	False	No
4103	1976	ttnvbbobhee	6	0	0	0	8	0	0	0	0	0	14	0	0	0	0	1.58496	3440	1	0	0	False	False	False	False	False	3	False	False	False	No
496	1977	hjfgjjfs	2	0	0	0	0	0	0	0	0	0	2	0	0	0	0	1	54	1	4	8.01442e-08	False	False	False	False	False	3	False	False	False	Yes
1569	1978	as03124	23	0	0	0	23	0	0	0	0	0	46	0	0	0	0	2.50469	2542.94	1	0	0	False	False	False	False	False	3	False	False	False	No
2847	1979	ken36973658	23	0.0434783	0	1	19	0	0	0	0	0	42	1	0.0238095	0.0238095	1	2.82322	10418.2	1	0	0	False	False	False	False	False	3	False	False	False	No
4104	1980	ttt85220	4	0	0	0	2	0	0	0	0	0	6	0	0	0	0	1.58496	2630.33	1	0	0	False	False	False	False	False	3	False	False	False	No
497	1981	hjfsfd	8	0.875	0	7	33	0	0.939394	0.939394	0	31	41	38	0.170732	0.926829	38	0	18	1	1	8.01442e-06	False	False	False	False	False	3	False	False	False	Yes
1570	1982	as08323	1	0	0	0	15	0	0.266667	0.266667	0	4	16	4	0	0.25	4	0	3158	1	0	0	False	False	False	False	False	3	False	False	False	No
2848	1983	ken41307	5	0	0	0	6	0	0	0	0	0	11	0	0	0	0	0.811278	2760.25	1	0	0	False	False	False	False	False	0	False	False	False	No
4106	1984	turekiss	50	0.04	0	2	43	0	0.0465116	0.0465116	0	2	93	4	0.0215054	0.0430108	4	3.20123	2565.87	1	0	0	False	False	False	False	False	3	False	False	False	No
498	1985	hjuyfdsnuefuew	23	0	0	0	17	0	0.0588235	0.0588235	1	0	40	1	0	0.025	0	0.640206	29.2353	2	32.7162	0.00497311	True	False	False	False	False	3	False	False	False	Yes
1571	1986	as10116117	1	0	0	0	1	0	0	0	0	0	2	0	0	0	0	0	1371	1	0	0	False	False	False	False	False	3	False	False	False	No
2849	1987	kenny1021	170	0.229412	38	1	178	0	0.247191	0.247191	42	2	348	83	0.112069	0.238506	3	2.6216	439.157	1	0	0	False	False	False	False	False	3	False	False	False	No
4107	1988	tw_tjormp	101	0.00990099	1	0	105	0	0.00952381	0.00952381	1	0	206	2	0.00485437	0.00970874	0	3.09473	4102.49	1	0	0	False	False	False	False	False	3	False	False	False	No
499	1989	hkgdd	3	0.333333	1	0	0	0	0	0	0	0	3	1	0.333333	0.333333	0	0	6	1	0	0	False	False	False	False	False	0	False	False	False	Yes
1572	1990	as24698739	25	0	0	0	15	0	0	0	0	0	40	0	0	0	0	2.95499	2320.92	1	0	0	False	False	False	False	False	3	False	False	False	No
2850	1991	kennygaga1661	27	0.259259	0	7	26	0	0.0384615	0.0384615	0	1	53	8	0.132075	0.150943	8	2.74717	7208.22	1	0	0	False	False	False	False	False	3	False	False	False	No
4108	1992	tw_user_001	417	0.0143885	5	1	379	0	0.0158311	0.0158311	5	1	796	12	0.00753769	0.0150754	2	3.19132	2270.78	1	0	0	False	False	False	False	False	3	False	False	False	No
500	1993	hnbwa	46	0.456522	21	0	19	0	0.736842	0.736842	14	0	65	35	0.323077	0.538462	0	0.286397	14.45	2	42.1001	0.000213386	True	False	False	False	False	4	False	False	False	Yes
1573	1994	as32sdfsd	1	0	0	0	2	0	0	0	0	0	3	0	0	0	0	0	17	1	0	0	False	False	False	False	False	3	False	False	False	No
2851	1995	kenshin1307	15	0	0	0	13	0	0	0	0	0	28	0	0	0	0	2.64559	1929.79	1	0	0	False	False	False	False	False	3	False	False	False	No
4109	1996	tw00298751	5	0	0	0	5	0	0	0	0	0	10	0	0	0	0	1.5	2813.5	1	0	0	False	False	False	False	False	3	False	False	False	No
501	1997	holakquxixue	5	1	5	0	0	0	0	0	0	0	5	5	1	1	0	0	0	0	0	0	False	False	False	False	False	0	False	False	False	Yes
1574	1998	as34259	6	0	0	0	7	0	0	0	0	0	13	0	0	0	0	1.9183	3022.17	1	0	0	False	False	False	False	False	3	False	False	False	No
[truncated: 2,541 more rows]
